1 **TITLE: Interplay of macromolecular interactions during assembly of human DNA**  
2 **polymerase  $\delta$  holoenzymes and initiation of DNA synthesis**

3  
4 Jessica L. Norris<sup>1</sup>, Lindsey O. Rogers<sup>1</sup>, Kara G. Pytko<sup>1</sup>, Rachel L. Dannenberg<sup>1</sup>, Samuel  
5 Perreault<sup>1</sup>, Vikas Kaushik<sup>2</sup>, Sahiti Kuppa<sup>2</sup>, Edwin Antony<sup>2</sup>, and Mark Hedglin<sup>1,\*</sup>

6 From the <sup>1</sup>Department of Chemistry, The Pennsylvania State University, University Park, PA  
7 16802

8 From the <sup>2</sup>The Saint Louis University School of Medicine, Department of Biochemistry and  
9 Molecular Biology, St. Louis MO, 63104

10  
11 Running Title:

12  
13 \*To whom correspondence should be addressed: Mark Hedglin: Department of Chemistry, The  
14 Pennsylvania State University, University Park, PA 16802; [muh218@psu.edu](mailto:muh218@psu.edu); Tel. (814) 863-  
15 1080

16  
17 **Keywords:** RPA, PCNA, DNA polymerase  $\delta$ , human lagging strand DNA replication, FRET

---

18  
19  
20 **ABSTRACT**

21 In humans, DNA polymerase  $\delta$  (Pol  $\delta$ ) holoenzymes, comprised of Pol  $\delta$  and the processivity  
22 sliding clamp, proliferating cell nuclear antigen (PCNA), carry out DNA synthesis during  
23 lagging strand DNA replication, initiation of leading strand DNA replication, and the major  
24 DNA damage repair and tolerance pathways. Pol  $\delta$  holoenzymes are assembled at  
25 primer/template (P/T) junctions and initiate DNA synthesis in a coordinated process involving  
26 the major single strand DNA-binding protein complex, replication protein A (RPA), the  
27 processivity sliding clamp loader, replication factor C (RFC), PCNA, and Pol  $\delta$ . Each of these  
28 factors interact uniquely with a P/T junction and most directly engage one another. Currently, the  
29 interplay between these macromolecular interactions is largely unknown. In the present study,  
30 novel Förster Resonance Energy Transfer (FRET) assays reveal that dynamic interactions of  
31 RPA with a P/T junction during assembly of a Pol  $\delta$  holoenzyme and initiation of DNA synthesis  
32 maintain RPA at a P/T junction and accommodate RFC, PCNA, and Pol  $\delta$ , maximizing the  
33 efficiency of each process. Collectively, these studies significantly advance our understanding of  
34 human DNA replication and DNA repair.

35  
36 In humans, DNA polymerase  $\delta$  (Pol  $\delta$ ) holoenzymes, comprised of Pol  $\delta$  and the processivity  
37 sliding clamp, proliferating cell nuclear antigen (PCNA), carry out DNA synthesis during  
38 lagging strand DNA replication, the initiation of leading strand DNA replication, and the major  
39 DNA damage repair and tolerance pathways<sup>1-11</sup>. In each of these DNA synthesis pathways, Pol  $\delta$   
40 holoenzymes are assembled at nascent primer/template (P/T) junctions and initiate DNA  
41 synthesis in a complex process that requires the spatially and temporally coordinated actions of  
42 many cellular factors that all interact with nascent P/T junctions; namely, the major single strand  
43 DNA (ssDNA)-binding protein complex, replication protein A (RPA), the processivity sliding  
44 clamp loader complex, replication factor C (RFC), PCNA, and Pol  $\delta$  (**Figure 1A**)<sup>12-22</sup>. Each of

45 these protein–DNA interactions with P/T junctions are unique (**Figure 1B**) and transpire in the  
46 context of the other protein–DNA interactions that assemble and disassemble over time.  
47 Furthermore, many of these protein–DNA interactions significantly overlap, implying mutual  
48 exclusivity and innate competition. Finally, nearly all of the aforementioned cellular factors  
49 (RPA, RFC, PCNA, Pol  $\delta$ ) directly engage one another through protein–protein interactions  
50 (**Figure 1C**). Currently, the interplay between the macromolecular interactions involved in the  
51 assembly of Pol  $\delta$  holoenzymes and subsequent initiation of DNA synthesis is unknown, greatly  
52 limiting our fundamental understanding of human DNA replication and DNA damage repair. In  
53 the present study, we design and utilize a novel and efficient Förster Resonance Energy Transfer  
54 (FRET) assay that directly and continuously monitors the interactions of PCNA and RPA with  
55 P/T junctions as Pol  $\delta$  holoenzymes are assembled and initiate DNA synthesis. Results reveal  
56 that dynamic interactions of RPA subunits with a P/T junction during assembly of a Pol  $\delta$   
57 holoenzyme and initiation of DNA synthesis both maintain RPA at the P/T junction and  
58 accommodate RFC, PCNA, and Pol  $\delta$ , maximizing the efficiency of each process.

59

## 60 **Results**

61 *RPA OBA maintains contacts with a P/T junction throughout loading of the resident PCNA.*

62 The ssDNA immediately adjacent to a nascent P/T junction is initially engaged by an RPA  
63 heterotrimer in an orientation-specific manner, as depicted in **Figure 1A**. In short,  
64 oligonucleotide binding (OB) fold A (OBA) of the RPA1 subunit aligns closer to the 5' end of  
65 the ssDNA sequence and OBD of the RPA2 subunit aligns closer to the 3' end such that OBD  
66 and OBC directly contact the 3' terminus of the primer strand<sup>12-19</sup>. Next, RFC loads PCNA onto a  
67 nascent P/T junction that is engaged by RPA. Specifically, RFC, in complex with ATP, engages  
68 the “front face” of a free PCNA clamp in solution, opens the sliding clamp, and the  
69 RFC•ATP•“Open” PCNA complex, referred to herein as the loading complex, engages a nascent  
70 P/T junction such that the “front face” of the PCNA clamp is oriented towards the 3' terminus of  
71 the primer from which DNA synthesis initiates. Loading complexes may be targeted to P/T  
72 junctions engaged by RPA through direct protein•protein interactions between subunits 1 – 3 of  
73 the RFC complex and the RPA1 subunit of the RPA complex (**Figure 1C**)<sup>23,24</sup>. Upon engaging a  
74 nascent P/T junction, the loading complex adopts an activated conformation in which ATP  
75 hydrolysis by RFC is optimized. Herein, the activated conformation of the loading complex is  
76 referred to as the activated loading complex. ATP hydrolysis by RFC within the activated  
77 loading complex simultaneously closes PCNA around the DNA and the closed (i.e., loaded)  
78 PCNA is subsequently released onto the double stranded DNA (dsDNA) region of the nascent  
79 P/T junction. The resultant RFC•ADP complex then releases into solution, and this step is rate-  
80 limited by dissociation of the RFC•ADP complex from the RPA1 subunit of the resident RPA  
81 <sup>20,21,23,25</sup>. After completion of PCNA loading, the resident RPA stabilizes the loaded PCNA  
82 at/near the nascent P/T junction by prohibiting RFC-catalyzed unloading of PCNA and diffusion  
83 of PCNA along the adjacent ssDNA<sup>25</sup>.

84 RPA maintains contact(s) with a nascent P/T junction throughout loading of the resident  
85 PCNA<sup>25,26</sup>. Given the significant overlap in the DNA footprints of RPA and the activated  
86 complex on nascent P/T junctions (**Figure 1B**), it is unclear how this is possible. Specifically,  
87 both RPA and RFC (as part of the activated loading complex) directly engage the 3' terminus of  
88 the primer strand and at least 13 nucleotides (nt) of the template ssDNA strand immediately  
89 downstream of a nascent P/T junction<sup>12-19,24</sup>. To address this long-standing enigma, we design

90 and utilize novel FRET assays to directly and continuously monitor RPA-DNA interactions  
91 throughout the PCNA loading process described above. Initially, we focus on the interaction(s)  
92 of RPA OBA with nascent P/T junctions during association and activation of the loading  
93 complex.

94 To establish and monitor interactions of loading complexes with P/T junctions, we utilized a  
95 previously characterized Cy3, Cy5 FRET pair comprised of a Cy3-labeled P/T DNA substrate  
96 (5' ddPCy3/T, **Figure S1**) and Cy5-labeled PCNA (Cy5-PCNA)<sup>22,25,27</sup>. The primer strand of the  
97 5' ddPCy3/T DNA substrate contains a Cy3 donor near the 5' end and is terminated at the 5' end  
98 with biotin and at the 3' end with a dideoxynucleotide (ddC). When pre-bound to NeutrAvidin,  
99 biotin attached to the 5' end of a primer strand prevents loaded PCNA from diffusing off the  
100 dsDNA end of the substrate. For consistency, NeutrAvidin is included in all experiments in the  
101 present study that utilize 5' biotin-terminated primers. A 3' dideoxy-terminated primer cannot be  
102 extended by a DNA polymerase and is implemented here in consideration of subsequent  
103 experiments in the present study that utilize human DNA polymerase  $\delta$  (pol  $\delta$ ). The Cy5-labeled  
104 PCNA homotrimer contains a single Cy5 acceptor at amino acid position 107 of a PCNA  
105 monomer. When encircling a P/T junction, either as part of a loading complex or as loaded  
106 PCNA, the Cy5 acceptor on the “back face” of the PCNA homotrimer is oriented towards the  
107 Cy3 donor on the 5' ddPCy3/T DNA substrate, yielding a FRET. Experiments are performed with  
108 adenosine 5'-O-(3-thio) triphosphate (ATP $\gamma$ S), an ATP analog in which one of the non-bridging  
109 oxygens of the  $\gamma$ -phosphoryl group is substituted for sulfur. This substitution severely inhibits  
110 hydrolysis of ATP by human RFC and, hence, stalls the PCNA loading pathway at activation of  
111 the loading complex<sup>21,28</sup>.

112 For a Cy3, Cy5 FRET pair, such as those described above, the gain and loss of FRET are  
113 directly indicated only by simultaneous, anti-correlated changes in the fluorescence emission  
114 intensities of the Cy3 donor and Cy5 acceptor. Specifically, appearance of (or increase in) FRET  
115 is indicated by a decrease (i.e., quenching) of Cy3 donor fluorescence emission intensity ( $I_{563}$ )  
116 together with a concomitant increase in sensitized Cy5 acceptor fluorescence emission intensity  
117 ( $I_{665}$ ). Likewise, disappearance of (or decrease in) FRET is indicated by a decrease in sensitized  
118  $I_{665}$  together with a concomitant increase (i.e., de-quenching) of  $I_{563}$ . Therefore, to directly and  
119 continuously monitor change in FRET over time, we utilized a spectrofluorometer that monitors  
120  $I_{563}$  and  $I_{665}$  essentially simultaneously ( $\Delta t = 0.235$  ms) and permits successive additions of  
121 components to a given reaction mixture. The approximate FRET efficiency,  $E_{\text{FRET}}$ , is then  
122 calculated for each  $I_{563}$ ,  $I_{665}$  pair over time. To analyze binding and activation of loading  
123 complexes on P/T junctions via FRET, the 5' ddPCy3/T DNA substrate is first pre-bound with  
124 NeutrAvidin and native RPA and  $I_{563}$  and  $I_{665}$  are monitored over time (**Figure 2A**). Then,  
125 loading complex pre-formed with RFC, Cy5-PCNA and ATP $\gamma$ S is added to the reaction mixture,  
126 the resultant solution is mixed, and the fluorescence emission intensity recording is resumed.  
127 Under the conditions of the assay, the loading complex rapidly engages the P/T junction and then  
128 the PCNA loading pathway stalls prior to ATP hydrolysis. Thus, an increase in  $E_{\text{FRET}}$   
129 encompasses all kinetic steps along the PCNA loading pathway up to but not including  
130 hydrolysis of ATP by RFC within the activated loading complex<sup>21,25,28</sup>.

131 Upon addition of the loading complex,  $I_{665}$  rapidly increases concomitantly with a rapid  
132 decrease in  $I_{563}$  after which  $I_{665}$  continues to increase slowly while  $I_{563}$  continues to decrease  
133 slowly (**Figure 2B, Top**). These synchronized, anti-correlated changes in  $I_{563}$  and  $I_{665}$  are  
134 indicative of the appearance and increase FRET (**Figure 2B, Bottom**). As observed in **Figure**  
135 **2C**,  $E_{\text{FRET}}$  traces increase to values significantly above the  $E_{\text{FRET}}$  traces predicted for no

136 interaction between the loading complex (with Cy5-PCNA and ATP $\gamma$ S) and 5' ddPCy3/T DNA.  
137 The increase in  $E_{\text{FRET}}$  is comprised of two phases (i.e., biphasic) with a lower limit for the  
138 observed rate constant of the first phase of  $k_{\text{obs inc},1} \geq 0.275 \pm 0.019 \text{ s}^{-1}$  and an observed rate  
139 constant of the second phase of  $k_{\text{obs inc},2} = 3.59 \pm 0.01 (\times 10^{-4} \text{ s}^{-1})$ . A lower limit of  $k_{\text{obs inc},1}$  is  
140 indicated due to the kinetic fitting of relatively few time points within its lifetime. The biphasic  
141 behavior and kinetic variables observed in the present study agree with that observed in a  
142 previous report that analyzed PCNA loading under similar conditions by monitoring sensitized  
143 Cy5 acceptor fluorescence emission intensity ( $I_{665}$ ) via stopped flow<sup>25</sup>. Next, we repeated these  
144 assays utilizing native PCNA and an alternative FRET pair to monitor interactions of RPA OBA  
145 with P/T junctions (**Figure 2D**). The Cy3-labeled P/T DNA substrate (ddP/5'TCy3 DNA, **Figure**  
146 **S1**) is identical to 5' ddPCy3/T DNA substrate described above except that the Cy3 donor is  
147 located towards the 5' end of the template strand, rather than the 5' end of the primer strand. The  
148 Cy5-labeled RPA (RPA-OBA-Cy5) contains a Cy5 acceptor on OBA of the RPA1 subunit that  
149 faces the Cy3 donor of ddP/5'TCy3 when engaged with the P/T junction (**Figure 2D**, **Figures S4**  
150 **– S6**)<sup>29</sup>. RPA-OBA-Cy5 fully supports RFC-catalyzed loading of PCNA onto P/T junctions  
151 (**Figure S7** and **Table S1**).

152 The ddP/5'TCy3 DNA substrate is first pre-bound with NeutrAvidin and RPA-OBA-Cy5 and  
153  $I_{563}$  and  $I_{665}$  are monitored over time (**Figure 2D**). Here, a significant, constant  $E_{\text{FRET}}$  is observed  
154 prior to the addition of RFC in any form due to the stable interaction of RPA-OBA-Cy5 with  
155 ddP/5'TCy3 DNA (**Figures S4 – S6**). Next, loading complex pre-formed with RFC, native  
156 PCNA, and ATP $\gamma$ S is added, and the fluorescence emission intensities are monitored over time.  
157 Upon addition of the loading complex, both  $I_{665}$  and  $I_{563}$  rapidly and very slightly decrease then  
158 very slowly decrease over time (**Figure 2E**, *Top*). These synchronized, correlated changes in the  
159 fluorescence emission intensities are not attributable to FRET. Thus, any apparent change in the  
160  $E_{\text{FRET}}$  values observed after the addition of the pre-formed loading complex is due to nonspecific  
161 effects<sup>30</sup>. For the example  $E_{\text{FRET}}$  trajectory depicted in **Figure 2E** (*Bottom*), the  $E_{\text{FRET}}$  values  
162 observed prior to the addition of the loading complex are maintained after addition of the pre-  
163 formed loading complex. For the averaged  $E_{\text{FRET}}$  trajectory depicted in **Figure 2F**, the  $E_{\text{FRET}}$   
164 traces observed prior to the addition of the loading complex persist and are maintained at the  
165 significantly elevated level above the  $E_{\text{FRET}}$  traces predicted for no interaction between  
166 ddP/5'TCy3 DNA and RPA-OBA-Cy5. This indicates that during binding and activation of the  
167 loading complex at a P/T junction the distance/orientation of RPA OBA relative to the 5' end of  
168 the template strand does not change. Thus, the interaction(s) of RPA OBA with a P/T junction  
169 are not affected by interactions of activated complexes with the RPA1 subunit of RPA or any  
170 kinetic step along the PCNA loading pathway up to but not including hydrolysis of ATP by RFC  
171 within the activated loading complex. Next, we performed similar assays with ATP (**Figure 3**) to  
172 investigate the interaction(s) of RPA OBA with a P/T junction during the remainder of the  
173 PCNA loading pathway.

174 First, interactions of RFC and PCNA with P/T junctions were monitored. The 5' ddPCy3/T  
175 DNA substrate is pre-bound with NeutrAvidin and native RPA. Then, Cy5-PCNA is added and  
176  $I_{563}$  and  $I_{665}$  are monitored over time (**Figure 3A**). Here, a low, constant  $E_{\text{FRET}}$  is observed prior  
177 to the addition of RFC in any form due to the presence of both the Cy3 donor and the Cy5  
178 acceptor.  $E_{\text{FRET}}$  values observed during this period are a true experimental baseline signal  
179 representing the absence of any interactions between Cy5-PCNA and the 5' ddPCy3/T  
180 DNA•RPA complex. Next, pre-formed RFC•ATP complex is added, and the fluorescence  
181 emission intensities are monitored. Here, RFC•ATP must first bind a “free” PCNA in solution in

182 order for loading to proceed. Under the conditions of the assay, PCNA loading is stoichiometric  
183 and biphasic<sup>25</sup>; first, all steps up to and including release of the closed PCNA ring on the P/T  
184 junction are rate-limited by a kinetic step along the PCNA loading pathway that occurs prior to  
185 and much slower than binding of the loading complex to the P/T junction; second, the loaded  
186 PCNA repositions relatively slowly on the P/T junction concurrent with release of the RFC•ADP  
187 complex into solution via its dissociation from the RPA1 subunit of the resident RPA engaged  
188 with the P/T junction. Thus, the appearance and increase in  $E_{\text{FRET}}$  towards maximal values  
189 encompasses all kinetic steps along the PCNA loading pathway and reflects; 1) a relatively fast  
190 kinetic step(s) ( $k_{\text{obs inc,1}}$ ) along the PCNA loading pathway that occurs prior to and much slower  
191 than binding of the loading complex to the P/T junction and; 2) a relatively slower release of the  
192 RFC•ADP complex into solution via its dissociation from the resident RPA engaged with the  
193 P/T junction ( $k_{\text{obs inc,2}}$ )<sup>25</sup>.

194 Upon addition of RFC•ATP, the observed changes in  $I_{665}$  and  $I_{563}$  are synchronized and anti-  
195 correlated (**Figure 3B, Top**), indicating the appearance and increase in FRET (**Figure 3B,**  
196 **Bottom**). As observed in **Figure 3C**,  $E_{\text{FRET}}$  traces rapidly increase to values significantly above  
197 the  $E_{\text{FRET}}$  values observed for no interaction between Cy5-PCNA and the 5' ddPCy3/T•RPA  
198 complex. As expected, the rapid increase in  $E_{\text{FRET}}$  observed upon addition of RFC is biphasic  
199 with observed rate constants of  $k_{\text{obs inc,1}} = 5.29 \pm 0.14$  ( $\times 10^{-2} \text{ s}^{-1}$ ) and  $k_{\text{obs inc,2}} = 1.72 \pm 0.02$  ( $\times 10^{-2}$   
200  $\text{ s}^{-1}$ ) (**Table S1**). Importantly,  $k_{\text{obs inc,2}}$  agrees very well with the values reported in a previous  
201 study that analyzed PCNA loading under similar conditions by monitoring sensitized Cy5  
202 acceptor fluorescence emission intensity ( $I_{665}$ ) via stopped flow. As discussed above,  $k_{\text{obs inc,2}}$   
203 reports on release of the RFC•ADP complex into solution via its dissociation from the RPA1  
204 subunit of the resident RPA engaged with the P/T junction. This kinetic step occurs throughout  
205 the time-dependent increase in  $E_{\text{FRET}}$  observed in **Figure 3C** and accounts for ~30 – 60% of the  
206  $E_{\text{FRET}}$  signal at any point in time, based on fits of the kinetic data.

207 Next, we repeated these assays utilizing ddP/5'TCy3 DNA substrate, RPA-OBA-Cy5, and  
208 PCNA (**Figure 3D**) to monitor the interaction(s) of RPA OBA with P/T junctions. Upon addition  
209 of RFC•ATP, neither  $I_{665}$  nor  $I_{563}$  change over time (**Figure 3E, Top**). These persistent  $I_{563}$  and  
210  $I_{665}$  values indicate that the observed  $E_{\text{FRET}}$  values observed prior to the addition of the  
211 RFC•ATP complex do not change upon its subsequent addition (**Figure 3E, Bottom**). As  
212 observed in **Figure 3F**, the  $E_{\text{FRET}}$  traces observed prior to the addition of the RFC•ATP complex  
213 persist and are maintained at the significantly elevated level above the  $E_{\text{FRET}}$  traces predicted for  
214 no interaction between ddP/5'TCy3 DNA and RPA-OBA-Cy5. This indicates that the  
215 distance/orientation of RPA OBA relative to the 5' end of the template strand does not change as  
216 the RFC•ADP complex engages and releases from the RPA1 subunit. Altogether, the results  
217 presented in **Figures 2** and **3** indicate that the distance/orientation of RPA OBA relative to the 5'  
218 end of the template strand does not change throughout the PCNA loading pathway. Thus, the  
219 interaction(s) of RPA OBA with a nascent P/T junction is maintained throughout loading of the  
220 resident PCNA and unaffected by interactions of RFC complexes (loading complexes,  
221 RFC•ADP) with the P/T junction and the RPA1 subunit of the resident RPA. Next, we focused  
222 on the interaction(s) of RPA OBD with nascent P/T junctions during loading of the resident  
223 PCNA.

224  
225 *RPA OBD is transiently displaced from the primer terminus of a P/T junction during loading of*  
226 *the resident PCNA.*

227 To establish and monitor interactions of loading complexes with P/T junctions, we utilized  
228 the aforementioned Cy5-PCNA and a Cy3-labeled P/T DNA substrate (5'PCy3/T, **Figure S1**)  
229 substrate in which the primer strand contains a Cy3 donor near the 5' end and is also terminated  
230 at the 5' end with biotin; the 3' terminus of the primer is not modified. As expected, experiments  
231 performed with ATP $\gamma$ S (**Figure 4A – C**) yielded nearly identical results to those observed for the  
232 5'ddPCy3/T DNA substrate under identical conditions (**Figure 2A – C**). Specifically, the  
233 increase in  $E_{\text{FRET}}$  is biphasic with a lower limit for the observed rate constant of the first phase of  
234  $k_{\text{obs inc},1} \geq 0.336 \pm 0.039 \text{ s}^{-1}$  and an observed rate constant of the second phase of  $k_{\text{obs inc},2} = 7.98 \pm$   
235  $0.01 \text{ (} \times 10^{-4} \text{ s}^{-1}\text{)}$  (**Figure 4C**). Next, we repeated these assays utilizing native PCNA and an  
236 alternative FRET pair to monitor interactions of RPA OBD with P/T junctions (**Figure 4D**). The  
237 Cy3-labeled P/T DNA substrate (3'PCy3/T DNA, **Figure S1**) is identical to the 5'PCy3/T DNA  
238 substrate described above except that the Cy3 donor is located at the 3' terminus of the primer  
239 strand, rather than near 5' end of the primer strand. The Cy5-labeled RPA (Cy5-OBD-RPA)  
240 contains a Cy5 acceptor on OBD of the RPA2 subunit that faces the Cy3 donor of the 3'PCy3/T  
241 when engaged with the P/T junction (**Supplemental Information, Figures S4 – S6**)<sup>29</sup>. RFC-  
242 catalyzed loading of PCNA onto P/T junctions is fully supported by Cy5-OBD-RPA (**Figure S8,**  
243 **Table S1**) and on the 3'PCy3/T DNA substrate (**Figure S9 – S10, Table S1**). The latter results  
244 agree with a recent report that revealed that *S. cerevisiae* RFC does not discriminate against  
245 nucleotides at the 3' terminus of the primer strand during clamp loading<sup>31</sup>.

246 The 3'PCy3/T DNA substrate is first pre-bound with NeutrAvidin and Cy5-OBD-RPA and  
247  $I_{563}$  and  $I_{665}$  are monitored over time (**Figure 4D**). A significant, constant  $E_{\text{FRET}}$  is observed prior  
248 to the addition of RFC in any form due to the stable interaction of Cy5-OBD-RPA with  
249 3'PCy3/T DNA (**Figures S4 – S6**). Upon addition of the loading complex (RFC•ATP $\gamma$ S•Cy5-  
250 PCNA),  $I_{665}$  rapidly decreases concomitantly with a rapid increase in  $I_{563}$  after which  $I_{665}$   
251 continues to decrease slowly while  $I_{563}$  continues to increase slowly (**Figure 4E, Top**). These  
252 synchronized, anti-correlated changes in  $I_{563}$  and  $I_{665}$  are indicative of a decrease in FRET  
253 (**Figure 4E, Bottom**). The decrease in  $E_{\text{FRET}}$  observed in **Figure 4F** is comprised of three phases  
254 with observed rate constants of  $k_{\text{obs inc},1} \geq 0.165 \pm 0.024 \text{ s}^{-1}$ ,  $k_{\text{obs inc},2} = 8.98 \pm 0.79 \text{ (} \times 10^{-3} \text{ s}^{-1}\text{)}$ , and  
255  $k_{\text{obs inc},3} = 7.89 \pm 0.04 \text{ (} \times 10^{-4} \text{ s}^{-1}\text{)}$ .  $k_{\text{obs inc},3}$ , which accounts for  $67.4 \pm 2.50 \%$  of the  $E_{\text{FRET}}$  decrease  
256 in **Figure 4F**, is nearly identical to  $k_{\text{obs},2}$  for the  $E_{\text{FRET}}$  increase observed in **Figure 4C**.

257 Interestingly, and in contrast to those observed in **Figure 2C** and **2F**, the  $E_{\text{FRET}}$  behaviors  
258 observed in **Figures 4C** and **4F** with ATP $\gamma$ S are anti-correlated and occur with very similar  
259 kinetics;  $E_{\text{FRET}}$  between PCNA and DNA increases (**Figure 4C**), indicating binding of the  
260 loading complex to the P/T junction and adoption of the activated conformation;  $E_{\text{FRET}}$  between  
261 RPA OBD and DNA decreases, indicating that the distance between RPA OBD and the 3'  
262 terminus of the primer strand increases. Together, this suggests that during PCNA loading,  
263 RPAOBD releases from the 3' terminus of the primer strand to accommodate binding and  
264 activation of the loading complex at the nascent P/T junction. Next, we performed similar assays  
265 with ATP (**Figure 5**) to investigate the interaction(s) of RPA OBD with a P/T junction during the  
266 remainder of the PCNA loading pathway.

267 First, interactions of RFC and PCNA with P/T junctions were monitored (**Figure 5A – C**).  
268 The 5'PCy3/T DNA substrate is pre-bound with NeutrAvidin and native RPA. Then, Cy5-PCNA  
269 is added and  $I_{563}$  and  $I_{665}$  are monitored over time (**Figure 5A**). Here, a low, constant  $E_{\text{FRET}}$  is  
270 observed prior to the addition of RFC in any form due to the presence of both the Cy3 donor and  
271 the Cy5 acceptor.  $E_{\text{FRET}}$  values observed during this period represent a true experimental baseline

272 signal representing the complete absence of interactions between Cy5-PCNA and the 5'PCy3/T  
273 DNA•RPA complex. Next, a pre-formed RFC•ATP complex is added, and the fluorescence  
274 emission intensities are monitored over time. Under the conditions of the assay, the appearance  
275 and increase in  $E_{\text{FRET}}$  towards maximal values encompasses all kinetic steps along the PCNA  
276 loading pathway and reflects; 1) a relatively fast kinetic step(s) ( $k_{\text{obs inc},1}$ ) along the PCNA  
277 loading pathway that occurs prior to and much slower than binding of the loading complex to the  
278 P/T junction and; 2) a relatively slower release of the RFC•ADP complex into solution via its  
279 dissociation from the RPA1 subunit of the resident RPA complex engaged with the P/T junction  
280 ( $k_{\text{obs inc},2}$ )<sup>25</sup>.

281 Upon addition of RFC•ATP, the observed changes in  $I_{665}$  and  $I_{563}$  are synchronized and anti-  
282 correlated (**Figure 5B, Top**), indicating the appearance and increase in FRET (**Figure 5B,**  
283 **Bottom**). As observed in **Figure 5C**,  $E_{\text{FRET}}$  traces rapidly increase to values significantly above  
284 the  $E_{\text{FRET}}$  values observed for no interaction between Cy5-PCNA and the 5'PCy3/T•RPA  
285 complex. As expected, the rapid increase in  $E_{\text{FRET}}$  observed upon addition of RFC is biphasic  
286 with observed rate constants of  $k_{\text{obs inc},1} = 4.34 \pm 0.18$  ( $\times 10^{-2} \text{ s}^{-1}$ ) and  $k_{\text{obs inc},2} = 1.78 \pm 0.04$  ( $\times 10^{-2}$   
287  $\text{ s}^{-1}$ ) (**Table S1**). Each of the observed rate constants agree very well with the values observed in  
288 **Figure 3C**. As discussed above,  $k_{\text{obs inc},2}$  reports on release of the RFC•ADP complex into  
289 solution via its dissociation from the RPA1 subunit of the resident RPA engaged with the P/T  
290 junction. This kinetic step occurs throughout the time-dependent increase in  $E_{\text{FRET}}$  observed in  
291 **Figure 5C** and accounts for ~30 – 60% of the  $E_{\text{FRET}}$  signal at any point in time, based on fits of  
292 the kinetic data. Release of the RFC•ADP complex into solution immediately follows hydrolysis  
293 of ATP by RFC within the activated loading complex (and concomitant closure of the sliding  
294 clamp ring) or release of the closed PCNA ring from the RFC•ADP complex<sup>25</sup>. Next, we  
295 repeated these assays utilizing the 3'PCy3/T DNA substrate, Cy5-OBD-RPA, and PCNA  
296 (**Figure 5D**) to monitor the interaction(s) of RPA OBD with P/T junctions.

297 A significant, constant  $E_{\text{FRET}}$  is observed prior to the addition of RFC in any form due to the  
298 stable interaction of Cy5-OBD-RPA with 3'PCy3/T DNA (**Figure 5E, Top, Figures S4 – S6**).  
299 After addition of RFC•ATP complex, RPA OBD subsequently releases from the 3' terminus of  
300 the primer strand to accommodate binding and activation of the loading complex at the P/T  
301 junction (**Figure 4**). Under the conditions of the assay depicted in **Figure 5D**, kinetic steps along  
302 the PCNA loading pathway from binding of the loading complex to the P/T junction up to and  
303 including release of the closed PCNA ring on the DNA are kinetically invisible; only release of  
304 RFC•ADP into solution (via its dissociation from the RPA1 subunit of the resident RPA) is  
305 visible. This raises at least three scenarios for  $E_{\text{FRET}}$  traces observed after the addition of the  
306 RFC•ATP complex. First, if RPA OBD interactions are not subsequently re-established with the  
307 3' terminus of the primer,  $E_{\text{FRET}}$  will instantaneously decrease upon addition of the RFC•ATP  
308 complex and then remain at a reduced level. Second, if RPA OBD interactions are re-established  
309 with the 3' terminus of the primer prior to and much faster than release of RFC•ADP into  
310 solution, then a change in  $E_{\text{FRET}}$  will not be observed upon addition of the RFC•ATP complex.  
311 Third, if RPA OBD interactions are re-established concomitantly with or subsequent to release of  
312 RFC•ADP into solution,  $E_{\text{FRET}}$  will instantaneously decrease upon addition of the RFC•ATP  
313 complex and then increase over time to  $E_{\text{FRET}}$  values observed prior to the addition of the  
314 RFC•ATP complex.

315 Upon addition of RFC•ATP, the slight changes in  $I_{665}$  and  $I_{563}$  are synchronized and  
316 correlated (**Figure 5E, Top**). This behavior is due to nonspecific effects<sup>30</sup>. For the example  $E_{\text{FRET}}$

317 trajectory depicted in **Figure 5E (Bottom)**,  $E_{\text{FRET}}$  values observed prior to the addition of the  
318 RFC•ATP complex are maintained after addition of the RFC•ATP loading complex. For the  
319 averaged  $E_{\text{FRET}}$  trajectory depicted in **Figure 5F**, the  $E_{\text{FRET}}$  traces observed prior to the addition  
320 of the RFC•ATP complex persist and are maintained at the significantly elevated level above the  
321  $E_{\text{FRET}}$  traces predicted for no interaction between 3'PCy3/T DNA and Cy5-OBD-RPA. This  
322 agrees with the second scenario described above where RPA OBD interactions are re-established  
323 with the 3' terminus of the primer prior to and much faster than release of RFC•ADP into  
324 solution via its dissociation from the RPA1 subunit of the resident RPA engaged with the P/T  
325 junction.

326

327 *Initiation of DNA synthesis by a Pol  $\delta$  holoenzyme alters the orientation of PCNA encircling a*  
328 *P/T junction.*

329 In the next step of human Pol  $\delta$  holoenzyme assembly, Pol  $\delta$  engages the “front face” of  
330 PCNA encircling a P/T junction, forming a holoenzyme, and subsequently initiates DNA  
331 synthesis (**Figure 1A**). Currently, the interplay between the macromolecular interactions of Pol  
332  $\delta$ , PCNA, and RPA at nascent P/T junctions are unknown. In the present study, we utilize FRET  
333 assays to analyze these macromolecular interactions. Initially, we focus on interactions of PCNA  
334 with P/T junctions during formation of the Pol  $\delta$  holoenzyme and subsequent initiation of DNA  
335 synthesis (**Figure 6A**).

336 The 5'ddPCy3/T DNA substrate is pre-bound with NeutrAvidin and native RPA. Then, Cy5-  
337 PCNA is added, and  $I_{563}$  and  $I_{665}$  are monitored over time. Next, pre-formed RFC•ATP is added,  
338 and the fluorescence emission intensities are monitored over time until PCNA loading is  
339 complete. Finally, dGTP is added together with Pol  $\delta$  at a stoichiometric ratio of Pol  $\delta$  to DNA  
340 and PCNA (i.e., DNA:PCNA:Pol  $\delta$  = 1:1:1) and the fluorescence emission intensities are  
341 monitored over time. Under these conditions, Pol  $\delta$  is stabilized in the initiation state for DNA  
342 synthesis where Pol  $\delta$  engages PCNA encircling the P/T junction, the P/T junction, and aligns an  
343 incoming dGTP at the 3' terminus of the primer strand in a correct base pair (bp) with the  
344 template nucleotide (C) immediately 5' of the P/T junction<sup>24,25,32</sup>. Both extension of the primer  
345 (via Pol  $\delta$  DNA polymerase activity) and degradation of the primer (via Pol  $\delta$  exonuclease  
346 activity) are prohibited due to the utilization of a 3' dideoxy-terminated primer and exonuclease-  
347 deficient Pol  $\delta$ <sup>25</sup>.

348 Upon addition of RFC•ATP, the observed changes in  $I_{665}$  and  $I_{563}$  are synchronized and anti-  
349 correlated (**Figure 6B, Top**), indicating the appearance and increase in FRET (**Figure 6B,**  
350 *Bottom*). As expected,  $E_{\text{FRET}}$  traces observed in **Figure 6C** rapidly increase in a biphasic manner  
351 upon addition of RFC•ATP and plateau at values significantly above the  $E_{\text{FRET}}$  traces observed  
352 for no interaction between Cy5-PCNA and 5'ddPCy3/T DNA. At the plateau, a PCNA is  
353 assembled onto each P/T junction and is rapidly and randomly diffusing along the dsDNA region  
354 ( $D = 2.24 \times 10^7 \text{ bp}^2/\text{s}$ )<sup>33</sup>. The biotin/NeutrAvidin complex at the 5' terminus of the template  
355 strands prevent diffusion of loaded PCNA off the dsDNA end of the P/T DNA substrate. The  
356 resident RPA engaged at the P/T junction prohibits diffusion of PCNA along the adjacent ssDNA  
357 as well as RFC-catalyzed unloading of PCNA<sup>25</sup>. In the current experimental setup, rapid  
358 diffusion of loaded PCNA along the dsDNA region is kinetically invisible and, hence,  $E_{\text{FRET}}$   
359 values observed at the plateau report on the average position of loaded PCNA relative to the 5'  
360 end of the primer strand. Upon addition of stoichiometric Pol  $\delta$ ,  $I_{665}$  rapidly increases  
361 concomitantly with a rapid decrease in  $I_{563}$ , after which both fluorescence emission intensities



362 stabilize and persist over time (**Figure 6B, Top**). These synchronized, anti-correlated changes in  
363  $I_{563}$  and  $I_{665}$  are indicative of a further increase in FRET (**Figure 6B, Bottom**). As observed in  
364 **Figure 6C**, upon addition of Pol  $\delta$ ,  $E_{\text{FRET}}$  traces rapidly increase to values significantly above the  
365  $E_{\text{FRET}}$  values observed for the 5' ddPCy3/T•RPA•Cy5-PCNA complex (i.e., loaded Cy5-PCNA).  
366 The rapid increase in  $E_{\text{FRET}}$  observed upon addition of Pol  $\delta$  is comprised of two phases (i.e.,  
367 biphasic) with an observed rate constant for the slower phase ( $k_{\text{obs inc},2}$ ) of  $8.41 \times 10^{-3} \pm 0.19$  ( $\times$   
368  $10^{-3} \text{ s}^{-1}$ ). The overall  $E_{\text{FRET}}$  increase is due to a further reduction in the distance between the Cy3  
369 donor near the 5' end of the primer strand and the Cy5 acceptor on the “back” face of the loaded  
370 PCNA ring. Next, we further characterized the enhanced FRET state observed upon addition of  
371 Pol  $\delta$  by monitoring the “% FRET Change” (depicted in **Figure 6C**) under various conditions  
372 (**Figure 6D**).

373 For reference, the % FRET change observed in **Figure 6C** is reported in **Figure 6D** (+  
374 dGTP, 1X Pol  $\delta$ ). Doubling the concentration of Pol  $\delta$  in the presence of dGTP (+ dGTP, 2X Pol  
375  $\delta$ ) did not affect the % FRET Change, indicating that the enhanced FRET state is saturated at  
376 stoichiometric Pol  $\delta$ . Next, dGTP was omitted. Under these conditions, Pol  $\delta$  saturates PCNA  
377 encircling P/T junctions to form Pol  $\delta$  holoenzymes but engages P/T junctions with dramatically  
378 low affinity, if at all<sup>21,22,24,27,34,35</sup>. Inclusion of only Pol  $\delta$  (- dGTP, + 1X Pol  $\delta$ ) did not yield a %  
379 FRET Change and this behavior persisted at increasing concentrations of Pol  $\delta$  (up to a  
380 DNA:PCNA:Pol  $\delta$  ratio of 1:1:4). This indicates that the enhanced FRET state requires dGTP.  
381 Furthermore, these results reveal that Pol  $\delta$  alone does not displace RPA from a P/T junction  
382 upon engaging the resident PCNA, as follows. A large protein, such as Pol  $\delta$ , simply binding to  
383 PCNA encircling a P/T junction decreases the diffusion constant only 2.1-fold<sup>33</sup>. Thus, in the  
384 absence of dNTPs, if Pol  $\delta$  displaced RPA from the 5' ddPCy3/T DNA upon engaging the  
385 resident Cy5-PCNA, the resultant Cy5-PCNA•Pol  $\delta$  complex would rapidly diffuse off the  
386 ssDNA end of the 5' ddPCy3/T DNA simultaneously with RPA displacement. This would lead to  
387 a rapid decrease in  $E_{\text{FRET}}$  (rate-limited by displacement of RPA) and a subsequent, relatively  
388 slow increase in  $E_{\text{FRET}}$  as free Cy5-PCNA is reloaded by RFC. However, a % FRET Change is  
389 not observed in **Figure 6D** when only Pol  $\delta$  is included, indicating that loaded PCNA persists on  
390 P/T DNA throughout Pol  $\delta$  holoenzyme formation and, hence, RPA maintains contact(s) with the  
391 respective P/T junction throughout Pol  $\delta$  holoenzyme formation. This is directly investigated in  
392 **Figure 7** below.

393 Inclusion of only dGTP (+ dGTP, - Pol  $\delta$ ) led to a slight decrease in FRET due to the  
394 inhibition of PCNA re-loading by RFC (**Figure S11 - S13**)<sup>36</sup>. Thus, the enhanced FRET state  
395 requires Pol  $\delta$ . Altogether, the results in **Figure 6D** indicate that formation of the enhanced  
396 FRET state following RFC-catalyzed loading of PCNA requires both dGTP and Pol  $\delta$ . Hence,  
397 the enhanced FRET state represents the initiation state for DNA synthesis. Furthermore, these  
398 results reveal that formation of the initiation state for DNA synthesis alters the  
399 orientation/distance of the closed PCNA ring relative to the P/T junction. Next, we investigated  
400 the interactions of RPA with a P/T junction during formation of a Pol  $\delta$  holoenzyme and  
401 subsequent initiation of DNA synthesis.

402  
403 *RPA remains engaged with a P/T junction during formation of a Pol  $\delta$  holoenzyme and initiation*  
404 *of DNA synthesis.*

405 Human Pol  $\delta$  interacts (albeit with unknown affinity) with the RPA1 subunit of an RPA  
406 complex that is engaged with a P/T junction (**Figure 1C**) and, hence, these interactions may

407 initially target Pol  $\delta$  to P/T junctions where it captures a diffusing, loaded PCNA<sup>23,37</sup>. However,  
408 during initiation of DNA synthesis from a nascent P/T junction, the DNA footprints of RPA and  
409 Pol  $\delta$  on a P/T junction significantly overlap (**Figure 1B**)<sup>12-18,24,32</sup>. To investigate the interplay  
410 between the macromolecular interactions of Pol  $\delta$  and RPA at a nascent P/T junction, we  
411 performed FRET assays similar to those described above in **Figure 6** to monitor interactions of  
412 RPA OBA with a P/T junction during formation of a Pol  $\delta$  holoenzyme and initiation of DNA  
413 synthesis (**Figure 7**).

414 The ddP/5'TCy3 DNA substrate is pre-bound with NeutrAvidin and RPA-OBA-Cy5 (**Figure**  
415 **7A**). Then, PCNA is added followed by pre-formed RFC•ATP complex. After completion of  
416 RFC-catalyzed loading of PCNA,  $I_{563}$  and  $I_{665}$  are monitored over time. Here, a significant,  
417 constant  $E_{\text{FRET}}$  is observed prior to the addition of Pol  $\delta$  due to the stable interaction of RPA-  
418 OBA-Cy5 with ddP/5'TCy3 DNA (**Figures 2, 3, and S4 – S6**). Next, Pol  $\delta$  alone is added at a 2-  
419 fold excess to DNA and PCNA to ensure all loaded PCNA is engaged in a Pol  $\delta$  holoenzyme and  
420 the fluorescence emission intensities are monitored over time. Finally, to demonstrate RPA  
421 occupancy of the P/T junction following Pol  $\delta$  holoenzyme formation, a large excess of  
422 poly(dT)<sub>70</sub> ssDNA is added, and the fluorescence emission intensities are monitored over time.  
423 Human RPA has exceptionally high affinity for ssDNA at physiological ionic strength but can  
424 undergo facilitated exchange due to the dynamic ssDNA-binding interactions of its individual  
425 OB folds, enabling RPA to exchange between ssDNA sequences when free ssDNA is present in  
426 solution (**Figure S14**)<sup>29,38-40</sup>. The ssDNA binding affinity of human RPA is highest for poly(dT)  
427 and each poly(dT)<sub>70</sub> accommodates at least two RPA complexes<sup>12-14,41</sup>. Hence, poly(dT)<sub>70</sub> serves  
428 as an effective trap to release RPA-OBA-Cy5 from the ddP/5'TCy3 DNA substrate via facilitated  
429 exchange and prohibit re-binding.

430 Upon addition of Pol  $\delta$  alone, the slight changes in  $I_{665}$  and  $I_{563}$  are synchronized and  
431 correlated (**Figure 7B, Top**). For the example  $E_{\text{FRET}}$  trajectory depicted in **Figure 7B (Bottom)**,  
432 the  $E_{\text{FRET}}$  values observed after addition of Pol  $\delta$  increase very slightly and then slowly and  
433 minimally decrease over time, mirroring the synchronized, correlated changes observed for  $I_{665}$   
434 and  $I_{563}$  over time (**Figure 7B, Top**). This apparent time-dependent change in the  $E_{\text{FRET}}$  values  
435 observed after the addition of Pol  $\delta$  is due to nonspecific effects and not attributable to changes  
436 in the distance between the cyanine labels<sup>30</sup>. Upon addition of poly(dT)<sub>70</sub>, the observed changes  
437 in  $I_{665}$  and  $I_{563}$  are synchronized and anti-correlated (**Figure 7B, Top**), indicating a decrease in  
438 FRET (**Figure 7B, Bottom**). For the averaged  $E_{\text{FRET}}$  trajectory in **Figure 7C**, the  $E_{\text{FRET}}$  values  
439 observed prior to the addition of Pol  $\delta$  increase very slightly after addition of Pol  $\delta$ , and then  
440 slowly and minimally decrease. These time-dependent changes in  $E_{\text{FRET}}$  are due to indirect  
441 effects on the fluorescence emission intensities of Cy3 and Cy5 (**Figure 7B, Top**). Regardless,  
442  $E_{\text{FRET}}$  values observed after addition of Pol  $\delta$  remain within experimental error of the  $E_{\text{FRET}}$   
443 values observed prior to the addition of Pol  $\delta$  and also significantly elevated above the  $E_{\text{FRET}}$   
444 trace predicted for no interaction between ddP/5'TCy3 DNA and Cy5-OBD-RPA. Upon addition  
445 of excess poly(dT)<sub>70</sub>,  $E_{\text{FRET}}$  rapidly decreases over time to the  $E_{\text{FRET}}$  trace predicted for no  
446 interaction between ddP/5'TCy3 DNA and RPA-OBA-Cy5, indicating release of RPA-OBA-Cy5  
447 from ddP/5'TCy3 via facilitated exchange with the ssDNA trap. Together, this suggests that  
448 nearly all ( $\geq 85.1 \pm 11.6\%$ , based on the observed  $E_{\text{FRET}}$  changes), if not all, RPA maintains  
449 contact(s) with a P/T junction throughout formation of the resident Pol  $\delta$  holoenzyme, which  
450 may include direct protein•protein interactions with Pol  $\delta$ . This agrees with the results discussed  
451 above for **Figure 6D**.

452 Next, we repeated the experiments described in **Figure 7A – C** by adding dGTP  
453 simultaneously with a 2-fold excess of Pol  $\delta$  compared to DNA and PCNA (**Figure 7D – F**).  
454 Here, excess polymerase ensures all loaded PCNA is engaged with Pol  $\delta$  in the initiation state for  
455 DNA synthesis (**Figure 6D**). Upon addition of Pol  $\delta$  and dGTP, the slight changes in  $I_{665}$  and  $I_{563}$   
456 are synchronized and correlated (**Figure 7E, Top**). This behavior is due to nonspecific effects<sup>30</sup>.  
457 For the example  $E_{\text{FRET}}$  trajectory depicted in **Figures 7E (Bottom)** and the averaged  $E_{\text{FRET}}$   
458 trajectory depicted in **Figures 7F**, the  $E_{\text{FRET}}$  values observed prior to the addition of Pol  $\delta$  and  
459 dGTP slowly and minimally decrease after the addition of Pol  $\delta$  and dGTP due to indirect effects  
460 on the fluorescence emission intensities of Cy3 and Cy5 (**Figure 7E, Top**).  $E_{\text{FRET}}$  values  
461 observed after addition of Pol  $\delta$  and dGTP remain within experimental error of the  $E_{\text{FRET}}$  values  
462 observed prior to the addition of Pol  $\delta$  and dGTP and also significantly elevated above the  $E_{\text{FRET}}$   
463 trace predicted for no interaction between ddP/5'TCy3 DNA and Cy5-OBD-RPA. Upon addition  
464 of excess poly(dT)<sub>70</sub>,  $E_{\text{FRET}}$  rapidly decreases over time to the  $E_{\text{FRET}}$  trace predicted for no  
465 interaction between ddP/5'TCy3 DNA and RPA-OBA-Cy5, indicating release of RPA-OBA-Cy5  
466 from ddP/5'TCy3 via facilitated exchange with the ssDNA trap. Together, this indicates that  
467 nearly all ( $\geq 77.3 \pm 5.7\%$  based on the observed changes in  $E_{\text{FRET}}$ ), if not all, RPA maintains  
468 contact(s) with a P/T junction during initiation of DNA synthesis by the resident Pol  $\delta$   
469 holoenzyme.

470

## 471 Discussion

472 Human Pol  $\delta$  holoenzymes are assembled at primer/template (P/T) junctions and initiate  
473 DNA synthesis in a complex process that requires the spatially and temporally coordinated  
474 actions of RPA, RFC, PCNA, and Pol  $\delta$ . Each of these factors interact uniquely with a P/T  
475 junction and most directly engage one another. Currently, the interplay between these  
476 macromolecular interactions during Pol  $\delta$  holoenzyme assembly and initiation of DNA synthesis  
477 is largely unknown. In the present study, we designed and utilized novel FRET assays to monitor  
478 these macromolecular interactions using recombinant human proteins. Together with previous  
479 work from our lab and others, the results from the present study provide the first complete  
480 description of human Pol  $\delta$  holoenzyme assembly and initiation of DNA synthesis (**Figure 8**).

481 The ssDNA immediately adjacent to a nascent P/T junction is initially engaged by an RPA  
482 heterotrimer in an orientation-specific manner (**Figure 1**). Specifically, 30 – 33 nt of ssDNA are  
483 engaged with a defined 5'→3' polarity where OBA of the RPA1 subunit aligns closer to the 5'  
484 end of the ssDNA sequence and OBD of the RPA2 subunit aligns closer to the 3' end such that  
485 OBD and OBC directly contact the 3' terminus of the primer strand. RPA remains engaged with  
486 the P/T DNA with exceptionally high affinity but exists in microscopically dissociated states due  
487 to the dynamic ssDNA-binding interactions of its individual OB folds. In particular, both OBA  
488 and OBD have been directly observed to rapidly bind to and dissociate from ssDNA while RPA  
489 remains engaged with ssDNA<sup>12-19</sup>. Next, RFC, in complex with ATP, engages the “front face” of  
490 a free PCNA in solution, opens the sliding clamp, and the resultant loading complex engages a  
491 nascent P/T junction such that the “front face” of PCNA is oriented towards the 3' terminus of  
492 the primer from which DNA synthesis initiates (**Figure 8, Step 1**). Loading complexes may be  
493 targeted to P/T junctions engaged by RPA through direct protein•protein interactions between  
494 subunits 1 – 3 of the RFC complex and the RPA1 subunit of the RPA complex (**Figure 1C**)<sup>23,24</sup>.  
495 Such targeting, if it occurs, does not observably affect the interaction(s) of RPA OBA with a P/T  
496 junction (**Figures 2D - F**). Upon engaging a nascent P/T junction, the loading complex adopts an

497 activated conformation in which ATP hydrolysis by RFC is optimized (**Figures 2A - C** and **4A -**  
498 **C**). During association and activation of the loading complex, RPA OBD is released from the 3'  
499 terminus of the primer strand to accommodate binding and activation of the loading complex at  
500 the nascent P/T junction (**Figure 4D - F**) but RPA remains engaged with the P/T DNA through  
501 the persistent interaction(s) of at least RPA OBA with the template strand downstream of the P/T  
502 junction (**Figure 3D - F**). Given the dynamics of RPA•ssDNA complexes discussed above, we  
503 posit that a loading complex captures a P/T junction that is exposed during microscopic  
504 dissociation of RPA OBD, and likely RPA OBC, from the 3' terminus of the primer strand and  
505 the template ssDNA immediately 5' of the P/T junction. Microscopic dissociation of RPA OBA  
506 and other OB folds downstream of the nascent P/T junction do not manifest to microscopic  
507 dissociation of RPA.

508 ATP hydrolysis by RFC within the activated loading complex simultaneously closes PCNA  
509 around the DNA and the closed (i.e., loaded) PCNA is subsequently released onto the dsDNA  
510 region of the nascent P/T junction (**Figure 8, Step 2**). RPA engaged with a nascent P/T junction  
511 promotes release of closed PCNA from RFC•ADP either directly or indirectly via stimulation of  
512 ATP hydrolysis by RFC within the activated loading complex (and simultaneous closure of the  
513 PCNA clamp)<sup>25</sup>. Concomitant with closure of PCNA or release of loaded PCNA, the resultant  
514 RFC•ADP complex vacates the P/T junction, transferring to the RPA1 subunit, and the  
515 interactions of RPA OBD are re-established with the 3' terminus of the primer strand (**Figure 5D**  
516 **- F**). The RFC•ADP complex subsequently releases into solution (**Figure 8, Step 3**) and this  
517 step is rate-limited by dissociation of the RFC•ADP complex from the RPA1 subunit of the  
518 resident RPA engaged with the nascent P/T junction (**Figures 3A - C** and **5A - C**)<sup>20,21,23,25</sup>. RFC  
519 then exchanges ADP for ATP (**Figure 8, Step 4**) and is once again competent for PCNA loading.

520 Loaded PCNA rapidly and randomly diffuses ( $D = 2.24 \times 10^7$  bp<sup>2</sup>/s) along the dsDNA region  
521 immediately 5' of the P/T junction<sup>33</sup>. Diffusion of loaded PCNA away from a P/T junction is  
522 restricted by physical blocks, i.e., “protein roadblocks,” such as sub-nucleosomes and high-  
523 affinity transcription factors that rapidly re-assemble on or rebind to nascent DNA generated  
524 during DNA replication<sup>42-44</sup>. This is mimicked in the current experimental setup where  
525 biotin/NeutrAvidin complexes at the 5' termini of the template strands prevent diffusion of  
526 loaded PCNA off the dsDNA end of the P/T DNA substrates. The resident RPA engaged at the  
527 P/T junction prohibits diffusion of PCNA along the adjacent ssDNA as well as RFC-catalyzed  
528 unloading of PCNA<sup>25</sup>. Recent *in vivo* evidence suggests that enzyme-catalyzed unloading of  
529 PCNA from a P/T junction will not occur until the primer is completely extended and ligated to  
530 the downstream duplex region<sup>45</sup>. In the absence of catalyzed unloading of PCNA and significant  
531 translocation of loaded PCNA, the only pathway for dissociation of loaded PCNA from a nascent  
532 P/T junction is through spontaneous opening of the PCNA ring, which is dramatically slow [ $k_{\text{open}}$   
533  $= 1.25 \pm 0.32$  ( $\times 10^{-3}$ ) s<sup>-1</sup>]<sup>46</sup>, ~20-fold slower than the observed rate constant RFC-catalyzed  
534 loading of “free” PCNA onto a P/T junction in the presence of ATP (**Figure 3, 5, S3, S3 - S9,**  
535 **and Table 1**). Thus, upon dissociation of PCNA from a nascent P/T junction via spontaneous  
536 opening of the PCNA ring (**Figure 8, Step 5**), RFC utilizes ATP to instantly reload PCNA back  
537 onto the nascent P/T junction (**Figure 8, Steps 1 - 3**) such that the loss of loaded PCNA from a  
538 nascent P/T junction is very transient and essentially not observed (**Figure S11**)<sup>21,25</sup>.

539 In the next step of Pol  $\delta$  holoenzyme assembly, Pol  $\delta$  engages the “front face” of loaded  
540 PCNA encircling a P/T junction, forming a holoenzyme (**Figure 8, Step 6**). Human Pol  $\delta$  is  
541 comprised of four subunits, three of which contain PCNA-binding motifs and simultaneously  
542 bind all subunits within a given PCNA homotrimer. This multivalent interaction leads to a

543 significantly high affinity for PCNA encircling P/T junctions ( $K_D < 10 \text{ nM}$ )<sup>34</sup>. In the absence of  
544 dNTPs (i.e., no DNA synthesis), Pol  $\delta$  has dramatically low affinity, if any, for P/T junctions  
545 <sup>22,24,25,27,34</sup>. Thus, it is likely that Pol  $\delta$  directly engages a loaded PCNA that is rapidly and  
546 randomly diffusing along the dsDNA region of a nascent P/T junction. However, human Pol  $\delta$   
547 interacts (albeit with unknown affinity) with the RPA1 subunit of an RPA complex that is  
548 engaged with a P/T junction (**Figure 1C**). Thus, it is possible that these interactions initially  
549 target Pol  $\delta$  to a nascent P/T junction where it captures a diffusing, loaded PCNA<sup>23,37</sup>. Such  
550 targeting, if it occurs, as well as formation of a Pol  $\delta$  holoenzyme do not displace the resident  
551 RPA from nascent P/T junction nor observably affect the interaction(s) of RPA OBA with a P/T  
552 junction (**Figure 6D** and **7A-C**).

553 Finally, an assembled Pol  $\delta$  holoenzyme engages a nascent P/T junction and an incoming  
554 dNTP and aligns the incoming dNTP at the 3' terminus of the primer strand in a correct bp with  
555 the template nucleotide immediately 5' of the P/T junction (**Figure 8, Step 7**)<sup>24,25,32</sup>. The results  
556 presented in **Figure 6** indicate that formation of the initiation state for DNA synthesis alters the  
557 orientation/distance of the closed PCNA ring relative to the P/T junction. Specifically, the  
558 distance between the 5' end of the primer strand and the “back face” of the loaded PCNA ring is  
559 decreased. In the initiation state for DNA synthesis, Pol  $\delta$  directly engages 12 – 14 bp of the  
560 dsDNA region immediately upstream of the nascent P/T junction and PCNA encircles the next  
561 10 – 12 bp directly upstream<sup>24,32</sup>. Hence, the aforementioned decrease in distance is likely due to  
562 the Pol  $\delta$ •PCNA interaction maintaining loaded PCNA in closer proximity to the 5' end of the  
563 primer strand. The results presented in **Figure 7D – F** indicate that during initiation of DNA  
564 synthesis by the resident Pol  $\delta$  holoenzyme the interaction of RPA OBA is not observably  
565 affected and nearly all, if not all, RPA maintains contact(s) with a nascent P/T junction. In the  
566 initiation state for DNA synthesis, Pol  $\delta$  directly engages the 3' terminus of the primer strand and  
567 4 - 6 nt of the template ssDNA strand immediately downstream of a nascent P/T junction and  
568 these protein•DNA interactions significantly overlap with those of the resident RPA complex  
569 (**Figure 1B**)<sup>12-18,24,32</sup>. This situation is similar to that of the overlap of the activated loading  
570 complex and the RPA complex at nascent P/T junction where RPA OBD transiently releases  
571 from the 3' terminus of the primer strand to accommodate binding and activation of the loading  
572 complex (**Figure 8, Step 1**). Thus, we postulate RPA OBD is released from the 3' terminus of the  
573 primer strand to accommodate initiation of DNA synthesis by the assembled Pol  $\delta$  holoenzyme.  
574 This hypothesis is currently being investigated.

575 Altogether, the results from the present study reveal that dynamic interactions of RPA  
576 subunits with a nascent P/T junction during assembly of a Pol  $\delta$  holoenzyme and initiation of  
577 DNA synthesis both maintain RPA at a P/T junction and accommodate RFC, PCNA, and Pol  $\delta$ .  
578 Furthermore, as discussed above, the only pathway for dissociation of loaded PCNA from a  
579 nascent P/T junction during these processes is through spontaneous opening of the PCNA ring,  
580 which is dramatically slow and essentially not observed. Hence, the coordinated actions of RPA,  
581 RFC, Pol  $\delta$  and protein roadblocks maximize the efficiency of PCNA utilization throughout  
582 these processes. As Pol  $\delta$  holoenzymes also carry out DNA synthesis during the major DNA  
583 repair and tolerance pathways, the current studies provide critical insights and direction for  
584 future studies on the DNA synthesis steps of long patch base excision repair, nucleotide excision  
585 repair, break-induced repair, mismatch DNA repair, translesion DNA synthesis and homology-  
586 dependent recombination<sup>2-6,11</sup>.

587

## 588 **Methods**

### 589 **Oligonucleotides**

590 Oligonucleotides were synthesized by Integrated DNA Technologies (Coralville, IA) or Bio-  
591 Synthesis (Lewisville, TX) and purified on denaturing polyacrylamide gels. The concentrations  
592 of unlabeled DNAs were determined from the absorbance at 260 nm using the calculated  
593 extinction coefficients. The concentrations of Cy5-labeled DNAs were determined from the  
594 extinction coefficient at 650 nm for Cy5 ( $\epsilon_{650} = 250,000 \text{ M}^{-1}\text{cm}^{-1}$ ). Concentrations of Cy3-  
595 labeled DNAs were determined from the extinction coefficient at 550 nm for Cy3 ( $\epsilon_{550} = 136,000$   
596  $\text{M}^{-1}\text{cm}^{-1}$ ). For annealing two ssDNAs (as depicted in **Figure S1**), the primer and corresponding  
597 complementary template strands were mixed in equimolar amounts in 1X Annealing Buffer (10  
598 mM TrisHCl, pH 8.0, 100 mM NaCl, 1 mM EDTA), heated to 95 °C for 5 minutes, and allowed  
599 to slowly cool to room temperature.

### 600 **Recombinant Human Proteins**

601 Human RPA, Cy5-PCNA, exonuclease-deficient Pol  $\delta$  (referred to herein as simply Pol  $\delta$ ) and  
602 RFC were obtained as previously described<sup>21,47</sup>. The concentration of active RPA was  
603 determined via a FRET-based activity assay as described previously<sup>48</sup>. Human RPA containing a  
604 Cy5 label at either residue 101 of the RPA2 subunit (Cy5-OBDRPA) or residue 211 of the  
605 RPA1 subunit (RPA-OBA-Cy5) was obtained essentially as described for *S. cerevisiae* RPA<sup>29</sup>.  
606 Residue 101 of the RPA2 subunit and residue 211 of the RPA1 subunit reside in the OB-folds D  
607 and A of the RPA heterotrimeric complex, respectively. The concentration of active Cy5-labeled  
608 RPA was determined by a FRET-based assay that is described in detail in the **Supplementary**  
609 **Information**.

### 610 **Ensemble FRET Measurements**

611 All experiments were performed at room temperature ( $23 \pm 2 \text{ }^\circ\text{C}$ ) and, unless indicated  
612 otherwise, in 1X  $\text{Mg}^{2+}/\text{Ca}^{2+}$  buffer (20 mM HEPES, pH 7.5, 150 mM KCl, 5 mM  $\text{MgCl}_2$ , 5 mM  
613  $\text{CaCl}_2$ ) supplemented with 1 mM DTT, 1 mM ATP, and the ionic strength was adjusted to  
614 physiological (200 mM) by the addition of appropriate amounts of KCl.  $\text{Ca}^{2+}$  is included to  
615 account for experimental conditions in future studies and the presence of  $\text{Ca}^{2+}$  does not affect the  
616 amount of RPA that binds to ssDNA (**Figure S6**) nor the amount of PCNA loaded onto DNA by  
617 RFC (**Figure S4A and B** and **Table S1**). All experiments were performed in a 16.100F-Q-  
618 10/Z15 sub-micro fluorometer cell (Starna Cells) and monitored in a Horiba Scientific Duetta-  
619 Bio fluorescence/absorbance spectrometer. Reaction solutions are excited at 514 nm and the  
620 fluorescence emission intensities ( $I$ ) are monitored essentially simultaneously at 563 nm ( $I_{563}$ )  
621 and 665 nm ( $I_{665}$ ) over time, recording  $I$  every 0.17 s. The acquisition rate of the instrument is  
622 510,000 nm/min. Thus, for a given recording, the time between the acquisition of  $I_{563}$  and  $I_{665}$  for  
623 each time point is negligible (0.235 ms). For all FRET experiments, excitation and emission slit  
624 widths are 10 nm. For any recording of the fluorescence emission intensities ( $I_{665}$  and  $I_{563}$ ), the  
625 approximate FRET efficiency is estimated from the equation  $E_{\text{FRET}} = \frac{I_{665}}{I_{665} + I_{563}}$ . All recorded  
626 fluorescence emission intensities are corrected by a respective dilution factor and all time  
627 courses are adjusted for the time between the addition of each component and the fluorescence  
628 emission intensity recording ( $\Delta t \leq 10 \text{ s}$ ). For each experiment below, the final concentrations of  
629 all reaction components are indicated. The concentrations of all nucleotides (ATP,  $\text{ATP}\gamma\text{S}$ ,  
630 dGTP) in all experimental solutions described below are each 1.0 mM and, hence, this  
631 concentration is maintained for each nucleotide upon mixing.

632 For PCNA loading experiments in the presence of ATP $\gamma$ S, a Cy3-labeled P/T DNA (20 nM,  
633 **Figure S1**), NeutrAvidin (80 nM), and ATP $\gamma$ S are pre-incubated with RPA (25 nM heterotrimer,  
634 wild type, RPA-OBA-Cy5 or Cy5-OBD-RPA) and the resultant solution is transferred to a  
635 fluorometer cell, and the cell is placed in the instrument. Fluorescence emission intensities ( $I_{665}$   
636 and  $I_{563}$ ) are monitored over time until both signals stabilize for at least 1 min. Within this stable  
637 region,  $E_{\text{FRET}}$  values are calculated from the observed fluorescence emission intensities ( $I_{665}$  and  
638  $I_{563}$ ) and averaged to obtain the  $E_{\text{FRET}}$  value observed prior to addition of the loading complex.  
639 Finally, a loading complex pre-formed with PCNA (20 nM homotrimer, Cy5-PCNA or PCNA),  
640 RFC (20 nM heteropentamer) and ATP $\gamma$ S is added, the resultant solution is mixed via pipetting,  
641 and the fluorescence emission intensities ( $I_{665}$  and  $I_{563}$ ) are monitored over time, beginning 10 s  
642 after the addition of loading complex (i.e.,  $\Delta t \leq 10$  s).

643 For PCNA loading experiments in the presence of ATP, a Cy3-labeled P/T DNA (20 nM,  
644 **Figure S1**), NeutrAvidin (80 nM), and ATP are pre-incubated with RPA (25 nM heterotrimer,  
645 wild type, RPA-OBA-Cy5 or Cy5-OBD-RPA). Then, PCNA (20 nM homotrimer, Cy5-PCNA or  
646 PCNA) is added, the resultant solution is transferred to a fluorometer cell, and the cell is placed  
647 in the instrument. Fluorescence emission intensities ( $I_{665}$  and  $I_{563}$ ) are monitored over time until  
648 both signals stabilize for at least 1 min. Within this stable region,  $E_{\text{FRET}}$  values are calculated  
649 from the observed fluorescence emission intensities ( $I_{665}$  and  $I_{563}$ ) and averaged to obtain the  
650  $E_{\text{FRET}}$  value observed prior to addition of the RFC•ATP. Finally, a pre-formed RFC•ATP  
651 complex (20 nM RFC heteropentamer) is added, the resultant solution is mixed via pipetting, and  
652 the fluorescence emission intensities ( $I_{665}$  and  $I_{563}$ ) are monitored over time, beginning 10 s after  
653 the addition of loading complex (i.e.,  $\Delta t \leq 10$  s).

654 For Pol  $\delta$  holoenzyme formation and initiation of DNA synthesis experiments with Cy5-  
655 PCNA, a solution containing a 5'ddPCy3/T DNA (20 nM, **Figure S1**), NeutrAvidin (80 nM),  
656 and ATP is pre-incubated with RPA (25 nM heterotrimer). Then, Cy5-PCNA (20 nM  
657 homotrimer) is added, the resultant solution is transferred to a fluorometer cell, and the cell is  
658 placed in the instrument. Fluorescence emission intensities ( $I_{665}$  and  $I_{563}$ ) are monitored over time  
659 until both signals stabilize for at least 1 min. Within this stable region,  $E_{\text{FRET}}$  values are  
660 calculated from the observed fluorescence emission intensities ( $I_{665}$  and  $I_{563}$ ) and averaged to  
661 obtain the  $E_{\text{FRET}}$  value observed prior to addition of the RFC•ATP. Next, a pre-formed  
662 RFC•ATP complex (20 nM RFC heteropentamer) is added, the resultant solution is mixed via  
663 pipetting, and the fluorescence emission intensities ( $I_{665}$  and  $I_{563}$ ) are monitored over time,  
664 beginning 10 s after the addition of loading complex (i.e.,  $\Delta t \leq 10$  s). Fluorescence emission  
665 intensities ( $I_{665}$  and  $I_{563}$ ) are monitored over time until both signals stabilize for at least 1 min.  
666 Within this stable region,  $E_{\text{FRET}}$  values are calculated from the observed fluorescence emission  
667 intensities ( $I_{665}$  and  $I_{563}$ ) and averaged to obtain the  $E_{\text{FRET}}$  value observed prior to addition of Pol  
668  $\delta$ . Finally, Pol  $\delta$  (20 – 80 nM Pol  $\delta$  heterotetramer,  $\pm$  dGTP) is added, the resultant solution is  
669 mixed by pipetting, and fluorescence emission intensities ( $I_{665}$  and  $I_{563}$ ) are monitored beginning  
670  $\leq 10$  s after the addition of Pol  $\delta$  ( $\pm$  dGTP).

671 For Pol  $\delta$  holoenzyme formation and initiation of DNA synthesis experiments with PCNA, a  
672 solution containing ddP/5'TCy3 DNA (20 nM, **Figure S1**), NeutrAvidin (80 nM), and ATP is  
673 pre-incubated with RPA-OBA-Cy5 (25 nM heterotrimer). Then, PCNA (20 nM homotrimer) is  
674 added, followed by pre-formed RFC•ATP complex (20 nM RFC heteropentamer). The resultant  
675 solution is pre-incubated for the duration of RFC-catalyzed loading of PCNA ( $\geq 5$  min),  
676 transferred to a fluorometer cell, and the cell is placed in the instrument. Fluorescence emission

677 intensities ( $I_{665}$  and  $I_{563}$ ) are monitored over time until both signals stabilize for at least 1 min.  
678 Within this stable region,  $E_{\text{FRET}}$  values are calculated from the observed fluorescence emission  
679 intensities ( $I_{665}$  and  $I_{563}$ ) and averaged to obtain the  $E_{\text{FRET}}$  value observed prior to addition of the  
680 Pol  $\delta$ . Next, Pol  $\delta$  (40 nM Pol  $\delta$  heterotetramer,  $\pm$  dGTP) is added, the resultant solution is mixed  
681 via pipetting, and the fluorescence emission intensities ( $I_{665}$  and  $I_{563}$ ) are monitored over time,  
682 beginning 10 s after the addition of Pol  $\delta$  ( $\pm$  dGTP,  $\Delta t \leq 10$  s). Fluorescence emission intensities  
683 ( $I_{665}$  and  $I_{563}$ ) are monitored over time until both signals stabilize for at least 1 min. Within this  
684 stable region,  $E_{\text{FRET}}$  values are calculated from the observed fluorescence emission intensities  
685 ( $I_{665}$  and  $I_{563}$ ) and averaged to obtain the  $E_{\text{FRET}}$  value observed after the addition of Pol  $\delta$ . Finally,  
686 poly(dT)<sub>70</sub> (413 nM) is added, the resultant solution is mixed by pipetting, and fluorescence  
687 emission intensities ( $I_{665}$  and  $I_{563}$ ) are monitored beginning  $\leq 10$  s after the addition of  
688 poly(dT)<sub>70</sub>.

689

## 690 SUPPLEMENTAL INFORMATION

691 Supplemental Information includes Supplementary Results, Supplementary Methods,  
692 Supplemental Figures S1 – S14, and a Supplemental Table (Table S1).

693

694 **ACKNOWLEDGEMENTS.** We would like to thank all members of the Hedglin and Antony  
695 labs for their efforts in reviewing/proofreading the current manuscript. This work was supported  
696 by funding from the National Institutes of Health to S.K. (F99CA274696), E.A. (R01  
697 GM130756, R01 GM133967, R35 GM149320, and S10 OD030343) and M.H. (R35 GM147238-  
698 02),

699

## 700 CONFLICTS OF INTEREST

701 The authors declare that they have no conflicts of interest with the contents of this article.<sup>1</sup>

702

## 703 AUTHOR CONTRIBUTIONS

704 J.L.N., K.G.P., R.L.D., S.P., S.K., and V.K. expressed, purified, and characterized all proteins.  
705 J.L.N. and L.O.R. performed the experiments. M.H. designed the experiments. M.H. and E.A.  
706 analyzed the data and wrote the paper.

707

## 708 REFERENCES

709

- 710 1 Zhou, Z. X., Lujan, S. A., Burkholder, A. B., Garbacz, M. A. & Kunkel, T. A. Roles for DNA  
711 polymerase delta in initiating and terminating leading strand DNA replication. *Nat Commun*  
712 **10**, 3992, doi:10.1038/s41467-019-11995-z (2019).
- 713 2 Hedglin, M. & Benkovic, S. J. Eukaryotic Translesion DNA Synthesis on the Leading and  
714 Lagging Strands: Unique Detours around the Same Obstacle. *Chem Rev* **117**, 7857-7877,  
715 doi:10.1021/acs.chemrev.7b00046 (2017).
- 716 3 Robertson, A. B., Klungland, A., Rognes, T. & Leiros, I. DNA repair in mammalian cells: Base  
717 excision repair: the long and short of it. *Cell Mol Life Sci* **66**, 981-993, doi:10.1007/s00018-  
718 009-8736-z (2009).



- 719 4 Spivak, G. Nucleotide excision repair in humans. *DNA Repair (Amst)* **36**, 13-18,  
720 doi:10.1016/j.dnarep.2015.09.003 (2015).
- 721 5 Donnianni, R. A. *et al.* DNA Polymerase Delta Synthesizes Both Strands during Break-  
722 Induced Replication. *Mol Cell* **76**, 371-381 e374, doi:10.1016/j.molcel.2019.07.033 (2019).
- 723 6 Modrich, P. Mechanisms in E. coli and Human Mismatch Repair (Nobel Lecture). *Angew*  
724 *Chem Int Ed Engl* **55**, 8490-8501, doi:10.1002/anie.201601412 (2016).
- 725 7 Nick McElhinny, S. A., Gordenin, D. A., Stith, C. M., Burgers, P. M. & Kunkel, T. A. Division of  
726 labor at the eukaryotic replication fork. *Mol Cell* **30**, 137-144,  
727 doi:10.1016/j.molcel.2008.02.022 (2008).
- 728 8 Miyabe, I., Kunkel, T. A. & Carr, A. M. The major roles of DNA polymerases epsilon and delta  
729 at the eukaryotic replication fork are evolutionarily conserved. *PLoS Genet* **7**, e1002407,  
730 doi:10.1371/journal.pgen.1002407 (2011).
- 731 9 Lujan, S. A., Williams, J. S. & Kunkel, T. A. DNA Polymerases Divide the Labor of Genome  
732 Replication. *Trends Cell Biol* **26**, 640-654, doi:10.1016/j.tcb.2016.04.012 (2016).
- 733 10 Clausen, A. R. *et al.* Tracking replication enzymology in vivo by genome-wide mapping of  
734 ribonucleotide incorporation. *Nat Struct Mol Biol* **22**, 185-191, doi:10.1038/nsmb.2957  
735 (2015).
- 736 11 Miyabe, I. *et al.* Polymerase delta replicates both strands after homologous recombination-  
737 dependent fork restart. *Nat Struct Mol Biol* **22**, 932-938, doi:10.1038/nsmb.3100 (2015).
- 738 12 Kim, C., Paulus, B. F. & Wold, M. S. Interactions of human replication protein A with  
739 oligonucleotides. *Biochemistry* **33**, 14197-14206 (1994).
- 740 13 Kim, C., Snyder, R. O. & Wold, M. S. Binding properties of replication protein A from human  
741 and yeast cells. *Mol Cell Biol* **12**, 3050-3059 (1992).
- 742 14 Kim, C. & Wold, M. S. Recombinant human replication protein A binds to polynucleotides  
743 with low cooperativity. *Biochemistry* **34**, 2058-2064 (1995).
- 744 15 Kolpashchikov, D. M. *et al.* Polarity of human replication protein A binding to DNA. *Nucleic*  
745 *Acids Res* **29**, 373-379, doi:10.1093/nar/29.2.373 (2001).
- 746 16 Pestryakov, P. E., Khlimankov, D. Y., Bochkareva, E., Bochkarev, A. & Lavrik, O. I. Human  
747 replication protein A (RPA) binds a primer-template junction in the absence of its major  
748 ssDNA-binding domains. *Nucleic Acids Res* **32**, 1894-1903, doi:10.1093/nar/gkh346 (2004).
- 749 17 Pestryakov, P. E. *et al.* Human replication protein A. The C-terminal RPA70 and the central  
750 RPA32 domains are involved in the interactions with the 3'-end of a primer-template DNA. *J*  
751 *Biol Chem* **278**, 17515-17524, doi:10.1074/jbc.M301265200 (2003).

- 752 18 Kolpashchikov, D. M. *et al.* Interaction of the p70 subunit of RPA with a DNA template  
753 directs p32 to the 3'-end of nascent DNA. *FEBS Lett* **450**, 131-134, doi:10.1016/s0014-  
754 5793(99)00484-6 (1999).
- 755 19 Kolinjivadi, A. M. *et al.* Smarcal1-Mediated Fork Reversal Triggers Mre11-Dependent  
756 Degradation of Nascent DNA in the Absence of Brca2 and Stable Rad51 Nucleofilaments.  
757 *Mol Cell* **67**, 867-881 e867, doi:10.1016/j.molcel.2017.07.001 (2017).
- 758 20 Hedglin, M., Kumar, R. & Benkovic, S. J. Replication clamps and clamp loaders. *Cold Spring*  
759 *Harb Perspect Biol* **5**, a010165 - a010183, doi:10.1101/cshperspect.a010165 (2013).
- 760 21 Hedglin, M., Perumal, S. K., Hu, Z. & Benkovic, S. Stepwise assembly of the human  
761 replicative polymerase holoenzyme. *Elife* **2**, e00278, 00271 - 00220,  
762 doi:10.7554/eLife.00278 (2013).
- 763 22 Hedglin, M., Pandey, B. & Benkovic, S. J. Stability of the human polymerase delta  
764 holoenzyme and its implications in lagging strand DNA synthesis. *Proc Natl Acad Sci U S A*  
765 **113**, E1777-1786, doi:10.1073/pnas.1523653113 (2016).
- 766 23 Yuzhakov, A., Kelman, Z., Hurwitz, J. & O'Donnell, M. Multiple competition reactions for RPA  
767 order the assembly of the DNA polymerase delta holoenzyme. *EMBO J* **18**, 6189-6199,  
768 doi:10.1093/emboj/18.21.6189 (1999).
- 769 24 Tsurimoto, T. & Stillman, B. Replication factors required for SV40 DNA replication in vitro. I.  
770 DNA structure-specific recognition of a primer-template junction by eukaryotic DNA  
771 polymerases and their accessory proteins. *J Biol Chem* **266**, 1950-1960 (1991).
- 772 25 Hedglin, M. & Benkovic, S. J. Replication Protein A Prohibits Diffusion of the PCNA Sliding  
773 Clamp along Single-Stranded DNA. *Biochemistry* **56**, 1824-1835,  
774 doi:10.1021/acs.biochem.6b01213 (2017).
- 775 26 Gomes, X. V. & Burgers, P. M. ATP utilization by yeast replication factor C. I. ATP-mediated  
776 interaction with DNA and with proliferating cell nuclear antigen. *J Biol Chem* **276**, 34768-  
777 34775, doi:10.1074/jbc.M011631200 (2001).
- 778 27 Hedglin, M., Pandey, B. & Benkovic, S. J. Characterization of human translesion DNA  
779 synthesis across a UV-induced DNA lesion. *Elife* **5**, e19788, 19781 - 19718,  
780 doi:10.7554/eLife.19788 (2016).
- 781 28 Kang, M. S. *et al.* Regulation of PCNA cycling on replicating DNA by RFC and RFC-like  
782 complexes. *Nat Commun* **10**, 2420, doi:10.1038/s41467-019-10376-w (2019).
- 783 29 Yates, L. A. *et al.* A structural and dynamic model for the assembly of Replication Protein A  
784 on single-stranded DNA. *Nat Commun* **9**, 5447, doi:10.1038/s41467-018-07883-7 (2018).

- 785 30 Tims, H. S. & Widom, J. Stopped-flow fluorescence resonance energy transfer for analysis of  
786 nucleosome dynamics. *Methods* **41**, 296-303, doi:10.1016/j.ymeth.2007.01.001 (2007).
- 787 31 Gaubitz, C. *et al.* Cryo-EM structures reveal high-resolution mechanism of a DNA  
788 polymerase sliding clamp loader. *Elife* **11**, doi:10.7554/eLife.74175 (2022).
- 789 32 Lancey, C. *et al.* Structure of the processive human Pol delta holoenzyme. *Nat Commun* **11**,  
790 1109, doi:10.1038/s41467-020-14898-6 (2020).
- 791 33 Kochaniak, A. B. *et al.* Proliferating cell nuclear antigen uses two distinct modes to move  
792 along DNA. *J Biol Chem* **284**, 17700-17710, doi:10.1074/jbc.M109.008706 (2009).
- 793 34 Zhou, Y., Meng, X., Zhang, S., Lee, E. Y. & Lee, M. Y. Characterization of human DNA  
794 polymerase delta and its subassemblies reconstituted by expression in the MultiBac system.  
795 *PLoS One* **7**, e39156, doi:10.1371/journal.pone.0039156 (2012).
- 796 35 Li, M., Larsen, L. & Hedglin, M. Rad6/Rad18 Competes with DNA Polymerases eta and delta  
797 for PCNA Encircling DNA. *Biochemistry* **59**, 407-416, doi:10.1021/acs.biochem.9b00938  
798 (2020).
- 799 36 Lee, S. H., Kwong, A. D., Pan, Z. Q. & Hurwitz, J. Studies on the activator 1 protein complex,  
800 an accessory factor for proliferating cell nuclear antigen-dependent DNA polymerase delta.  
801 *J Biol Chem* **266**, 594-602 (1991).
- 802 37 Mo, J., Liu, L., Leon, A., Mazloum, N. & Lee, M. Y. Evidence that DNA polymerase delta  
803 isolated by immunoaffinity chromatography exhibits high-molecular weight characteristics  
804 and is associated with the KIAA0039 protein and RPA. *Biochemistry* **39**, 7245-7254,  
805 doi:10.1021/bi0000871 (2000).
- 806 38 Ma, C. J., Gibb, B., Kwon, Y., Sung, P. & Greene, E. C. Protein dynamics of human RPA and  
807 RAD51 on ssDNA during assembly and disassembly of the RAD51 filament. *Nucleic Acids Res*  
808 **45**, 749-761, doi:10.1093/nar/gkw1125 (2017).
- 809 39 Pokhrel, N. *et al.* Dynamics and selective remodeling of the DNA-binding domains of RPA.  
810 *Nat Struct Mol Biol* **26**, 129-136, doi:10.1038/s41594-018-0181-y (2019).
- 811 40 Ahmad, F. *et al.* Hydrogen-deuterium exchange reveals a dynamic DNA-binding map of  
812 replication protein A. *Nucleic Acids Res* **49**, 1455-1469, doi:10.1093/nar/gkaa1288 (2021).
- 813 41 Blackwell, L. J. & Borowiec, J. A. Human replication protein A binds single-stranded DNA in  
814 two distinct complexes. *Mol Cell Biol* **14**, 3993-4001 (1994).
- 815 42 Shibahara, K. & Stillman, B. Replication-dependent marking of DNA by PCNA facilitates CAF-  
816 1-coupled inheritance of chromatin. *Cell* **96**, 575-585 (1999).

- 817 43 Fennessy, R. T. & Owen-Hughes, T. Establishment of a promoter-based chromatin  
818 architecture on recently replicated DNA can accommodate variable inter-nucleosome  
819 spacing. *Nucleic Acids Res* **44**, 7189-7203, doi:10.1093/nar/gkw331 (2016).
- 820 44 Smith, D. J. & Whitehouse, I. Intrinsic coupling of lagging-strand synthesis to chromatin  
821 assembly. *Nature* **483**, 434-438, doi:10.1038/nature10895 (2012).
- 822 45 Kubota, T., Katou, Y., Nakato, R., Shirahige, K. & Donaldson, A. D. Replication-Coupled PCNA  
823 Unloading by the Elg1 Complex Occurs Genome-wide and Requires Okazaki Fragment  
824 Ligation. *Cell Rep* **12**, 774-787, doi:10.1016/j.celrep.2015.06.066 (2015).
- 825 46 Perumal, S. K., Xu, X., Yan, C., Ivanov, I. & Benkovic, S. J. Recognition of a Key Anchor  
826 Residue by a Conserved Hydrophobic Pocket Ensures Subunit Interface Integrity in DNA  
827 Clamps. *J Mol Biol* **431**, 2493-2510, doi:10.1016/j.jmb.2019.04.035 (2019).
- 828 47 Henricksen, L. A., Umbricht, C. B. & Wold, M. S. Recombinant replication protein A:  
829 expression, complex formation, and functional characterization. *J Biol Chem* **269**, 11121-  
830 11132 (1994).
- 831 48 Li, M., Sengupta, B., Benkovic, S. J., Lee, T. H. & Hedglin, M. PCNA Monoubiquitination Is  
832 Regulated by Diffusion of Rad6/Rad18 Complexes along RPA Filaments. *Biochemistry*,  
833 doi:10.1021/acs.biochem.0c00849 (2020).

834  
835  
836  
837  
838  
839

---

<sup>1</sup> The content is solely the responsibility of the authors and does not necessarily represent the official views of the National Institutes of Health

840 **Figures and Figure Legends**

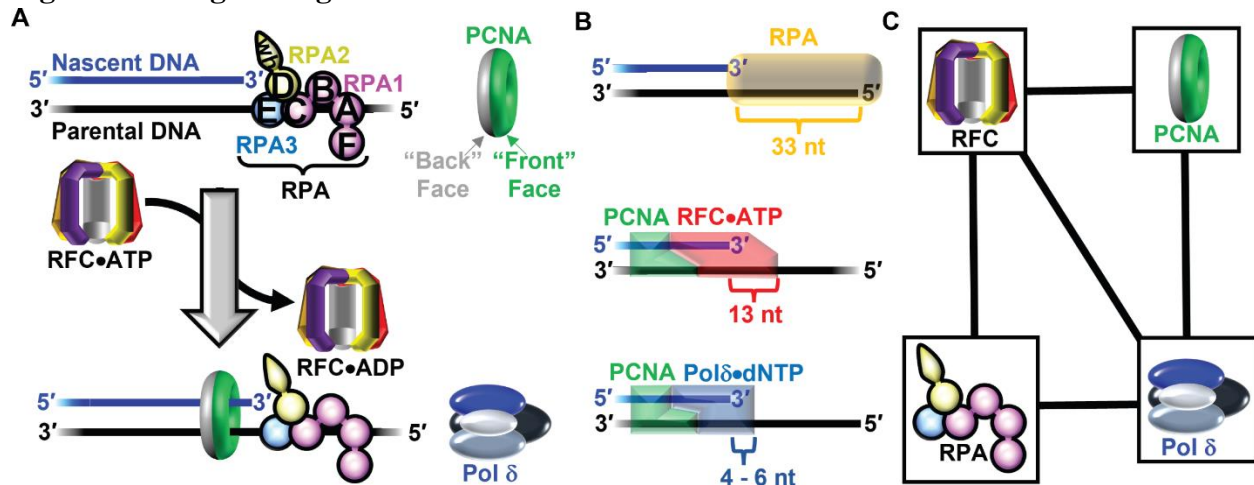

841 **Figure 1.** Assembly and macromolecular interactions of human Pol δ holoenzymes. (A)

842 Assembly of human Pol δ holoenzymes. The subunits of human RPA are color-coded (RPA1 in

843 pink, RPA2 in yellow, and RPA3 in blue) and depicted to illustrate the OB-folds (A – E) and

844 winged-helix (wh) domain. A nascent P/T junction is pre-engaged by RPA in an orientation-

845 specific manner (as depicted). First, RFC utilizes ATP to load PCNA onto a nascent P/T junction

846 in an orientation-specific manner such that the “front face” of the clamp is oriented towards the

847 3’ terminus of the primer from which DNA synthesis initiates. Next, Pol δ engages the “front

848 face” of the PCNA sliding clamp encircling the nascent P/T junction, forming a holoenzyme, and

849 subsequently initiates DNA synthesis (not shown). (B) Isolated protein•DNA interactions during

850 assembly of the Pol δ holoenzyme. Shown in *Top*, *Middle*, and *Bottom* are the DNA footprints of the

851 RPA complex, the activated RFC•ATP•“Open” PCNA complex (i.e., activated loading

852 complex), and the Pol δ holoenzyme, respectively. For each, the respective DNA region

853 protected (i.e., DNA footprint) is depicted as a given protein complex (shown in color as a

854 simple cartoon shape) overlaid on a P/T junction comprised of a 29 bp duplex region and a 33 nt

855 ssDNA overhang. The protected ssDNA region is indicated for each. (C) Protein•protein

856 interactions of the protein complexes involved in Pol δ holoenzyme assembly. Direct interactions

857 are indicated by a solid black line connecting two respective protein complexes.

858  
859  
860  
861  
862  
863  
864  
865  
866  
867  
868  
869  
870  
871

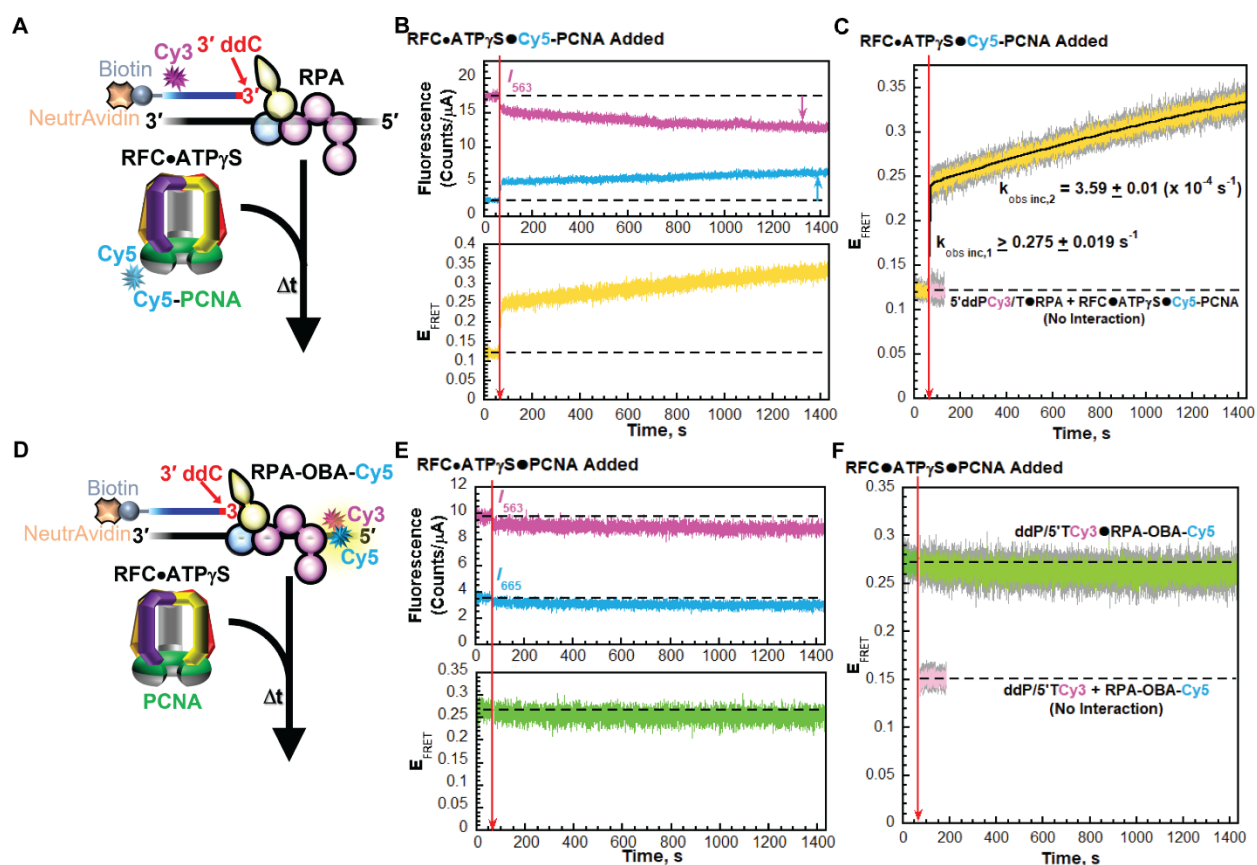

872 **Figure 2.** Interplay of RPA OBA and RFC interactions with nascent P/T junctions during PCNA  
 873 loading in the presence of ATP $\gamma$ S. (A - C) Monitoring interactions of a loading complex with a  
 874 P/T junction engaged by RPA. (A) Schematic representation of the FRET experiment performed  
 875 with 5' ddPCy3/T (+ NeutrAvidin), RPA, and loading complex pre-formed with RFC, ATP $\gamma$ S,  
 876 and Cy5-PCNA. (B) Sample time trajectories of  $I_{563}$  and  $I_{665}$  (Top) and their  $E_{\text{FRET}}$  (Bottom). The  
 877 time at which the loading complex is added is indicated by a red arrow. Changes in  $I_{563}$  and  $I_{665}$   
 878 are indicated by magenta and cyan arrows, respectively. For observation, the  $I_{563}$ ,  $I_{665}$ , and  $E_{\text{FRET}}$   
 879 values observed prior to the addition of the loading complex are fit to flat lines that are  
 880 extrapolated to the axis limits. (C) FRET data. Each  $E_{\text{FRET}}$  trace is the mean of at least three  
 881 independent traces with the S.E.M. shown in grey. The time at which the loading complex is  
 882 added is indicated by a red arrow. The  $E_{\text{FRET}}$  trace observed after the addition of the loading  
 883 complex is fit to a double exponential rise and the observed rate constants are reported in the  
 884 graph. The predicted  $E_{\text{FRET}}$  trace (pink) for no interaction between 5' ddPCy3/T•RPA complex  
 885 and the loading complex is fit to a flat line. (D - F) Monitoring RPA OBA interactions with a  
 886 P/T junction that is engaged by a loading complex. (D) Schematic representation of the  
 887 experiment. Reactions were carried out exactly as described for panel A above except that  
 888 ddP/5' TCy3 DNA, RPA-OBA-Cy5, and PCNA were utilized. (E) Sample time trajectory of  $I_{563}$   
 889 and  $I_{665}$  (Top) and their  $E_{\text{FRET}}$  (Bottom) are plotted as described for panel B above. (F) FRET  
 890 data. Each  $E_{\text{FRET}}$  trace is the mean of at least three independent traces with the S.E.M. shown in  
 891 grey. Data is plotted as described for panel C above. The  $E_{\text{FRET}}$  trace observed prior to the

892 addition of the loading complex is fit to a flat line that is extrapolated to the axis limits. The  
893 predicted  $E_{\text{FRET}}$  trace (pink) for no interaction between RPA-OBA-Cy5 and the ddP/5'TCy3  
894 DNA is fit to a flat line.

895  
896  
897  
898  
899  
900  
901  
902  
903  
904  
905  
906  
907  
908  
909  
910  
911  
912  
913  
914  
915  
916  
917  
918  
919  
920  
921  
922

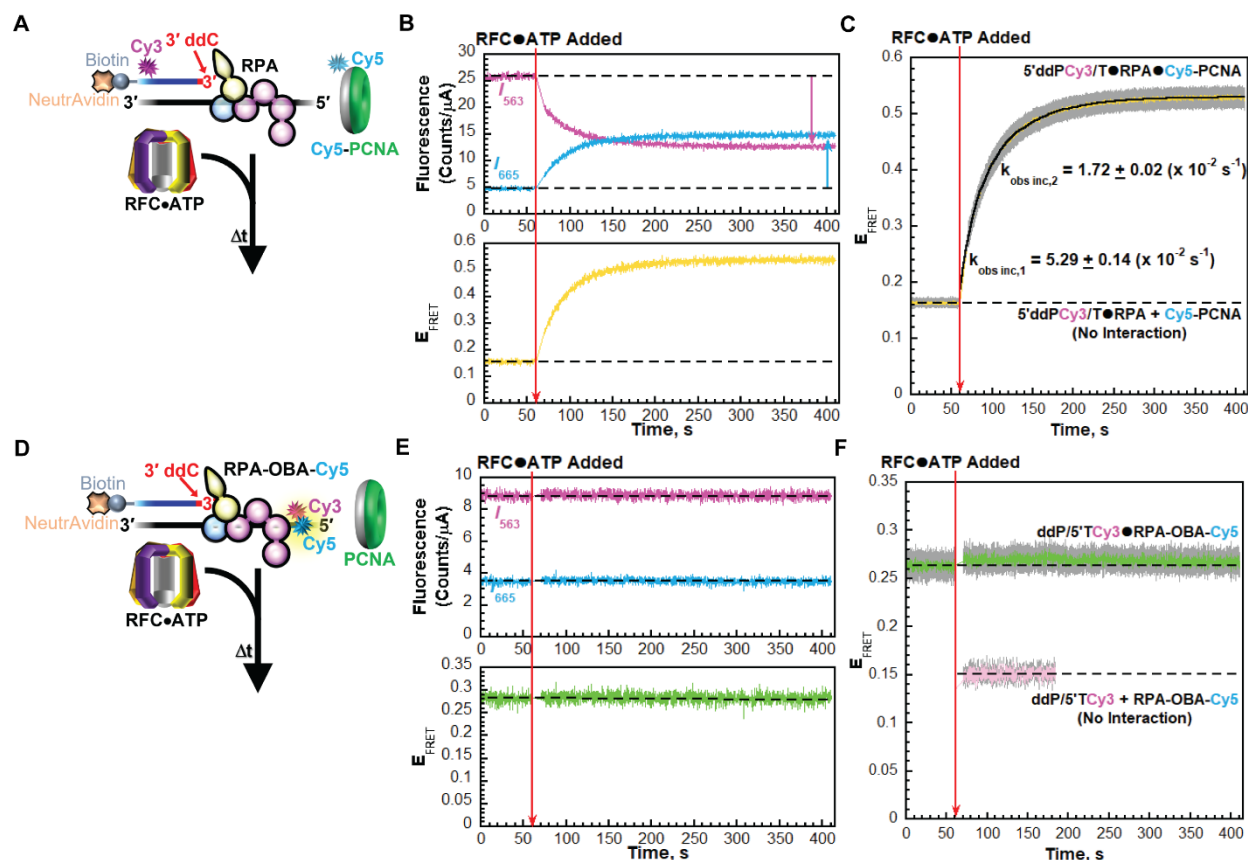

923 **Figure 3.** Interplay of RPA OBA and RFC interactions with nascent P/T junctions during PCNA  
 924 loading in the presence of ATP. (A - C) Monitoring interactions of RFC and PCNA with a P/T  
 925 junction engaged by RPA. (A) Schematic representation of the FRET experiment performed with  
 926 5'ddPCy3/T (+ NeutrAvidin), RPA, Cy5-PCNA and a pre-formed RFC•ATP complex. (B)  
 927 Sample time trajectories of  $I_{563}$  and  $I_{665}$  (Top) and their  $E_{FRET}$  (Bottom). The time at which the  
 928 RFC•ATP complex is added is indicated by a red arrow. Changes in  $I_{563}$  and  $I_{665}$  are indicated by  
 929 magenta and cyan arrows, respectively. For observation, the  $I_{563}$ ,  $I_{665}$ , and  $E_{FRET}$  values observed  
 930 prior to the addition of the RFC•ATP complex are fit to flat lines that are extrapolated to the axis  
 931 limits. (C) FRET data. Each  $E_{FRET}$  trace is the mean of at least three independent traces with the  
 932 S.E.M. shown in grey. The time at which the RFC•ATP complex is added is indicated by a red  
 933 arrow. The  $E_{FRET}$  trace observed prior to the addition of the RFC•ATP complex represents the  
 934 complete absence of interactions between the 5'ddPCy3/T•RPA complex and Cy5-PCNA and is  
 935 fit to a flat line that is extrapolated to the axis limits. The  $E_{FRET}$  trace observed after the addition  
 936 of the RFC•ATP complex is fit to a double exponential rise and the observed rate constants are  
 937 reported in the graph as well as in **Table S1**. (D - F) Monitoring RPA OBA interactions with a  
 938 P/T junction that is engaged by RFC. (D) Schematic representation of the experiment. Reactions  
 939 were carried out exactly as described in panel A except with ddP/5'TCy3 DNA, RPA-OBA-Cy5,  
 940 and PCNA. (E) Sample time trajectory of  $I_{563}$  and  $I_{665}$  (Top) and their  $E_{FRET}$  (Bottom) are plotted  
 941 as described in panel B. (F) FRET data. Each  $E_{FRET}$  trace is the mean of at least three  
 942 independent traces with the S.E.M. shown in grey. Data is plotted as described in panel C. The  
 943  $E_{FRET}$  trace observed prior to the addition of the RFC•ATP complex is fit to a flat line that is  
 944 extrapolated to the axis limits. The predicted  $E_{FRET}$  trace (pink) for no interaction between RPA-  
 945 OBA-Cy5 and the ddP/5'TCy3 DNA is fit to a flat line.



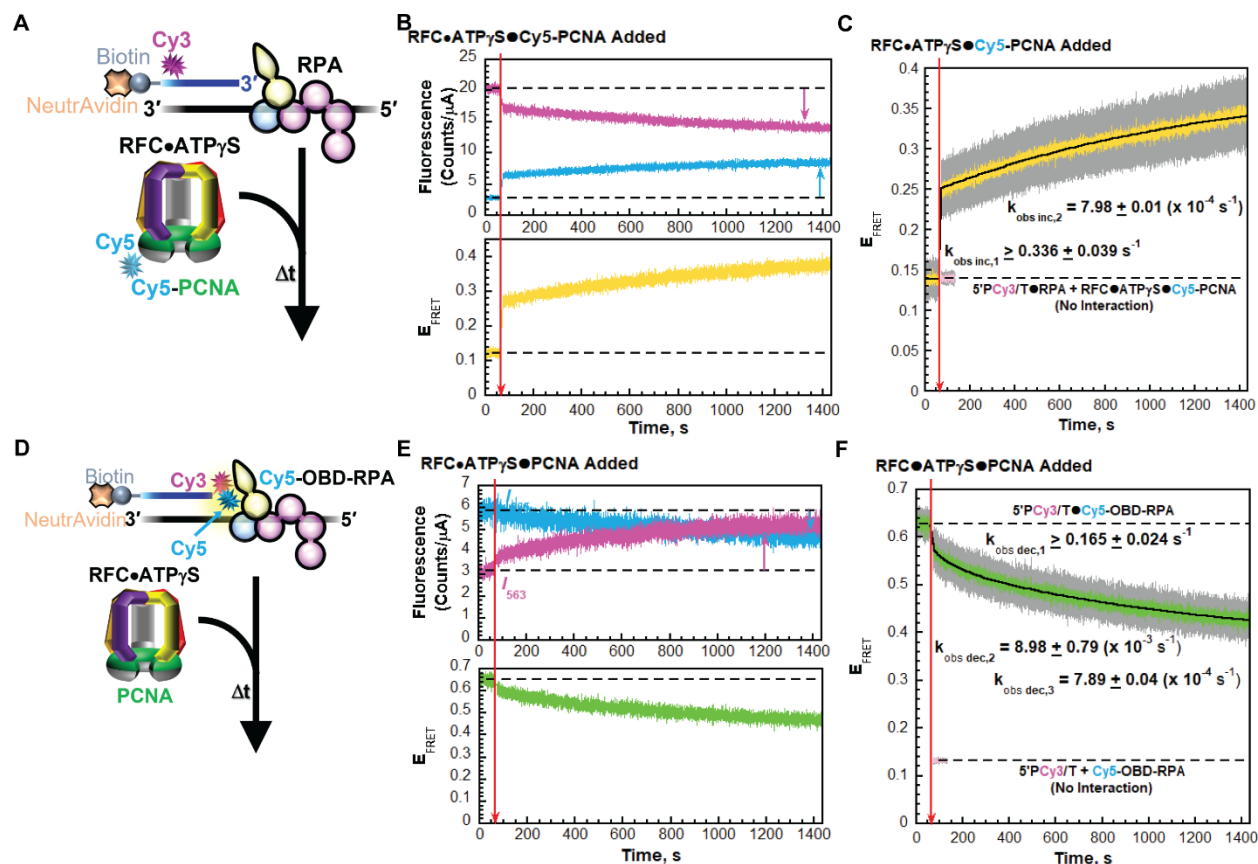

946 **Figure 4.** Interplay of RPA OBD and RFC interactions with nascent P/T junctions during PCNA  
 947 loading in the presence of ATP $\gamma$ S. (A - C) Monitoring interactions of a loading complex with a  
 948 P/T junction engaged by RPA. (A) Schematic representation of the FRET experiment performed  
 949 with 5'PCy3/T (+ NeutrAvidin), RPA, and loading complex pre-formed with RFC, ATP $\gamma$ S, and  
 950 Cy5-PCNA. (B) Sample time trajectories of  $I_{563}$  and  $I_{665}$  (Top) and their  $E_{FRET}$  (Bottom). The  
 951 time at which the loading complex is added is indicated by a red arrow. Changes in  $I_{563}$  and  $I_{665}$   
 952 are indicated by magenta and cyan arrows, respectively. For observation, the  $I_{563}$ ,  $I_{665}$ , and  $E_{FRET}$   
 953 values observed prior to the addition of the loading complex are fit to flat lines that are  
 954 extrapolated to the axis limits. (C) FRET data. Each  $E_{FRET}$  trace is the mean of at least three  
 955 independent traces with the S.E.M. shown in grey. The time at which the loading complex is  
 956 added is indicated by a red arrow. The  $E_{FRET}$  trace observed after the addition of the loading  
 957 complex is fit to a double exponential rise and the observed rate constants are reported in the  
 958 graph. The predicted  $E_{FRET}$  trace (pink) for no interaction between 5'PCy3/T•RPA complex and  
 959 the loading complex is fit to a flat line. (D - F) Monitoring RPA OBD interactions with a P/T  
 960 junction that is engaged by a loading complex. (D) Schematic representation of the experiment.  
 961 Reactions carried out exactly as described for panel A above except with P/5'TCy3 DNA,  
 962 Cy5-OBD-RPA, and PCNA. (E) Sample time trajectory of  $I_{563}$  and  $I_{665}$  (Top) and their  $E_{FRET}$   
 963 (Bottom) are plotted as described for panel B above. (F) FRET data. Each  $E_{FRET}$  trace is the mean  
 964 of at least three independent traces with the S.E.M. shown in grey. Data is plotted as described  
 965 for panel C above. The  $E_{FRET}$  trace observed prior to the addition of the loading complex is fit  
 966 to a flat line that is extrapolated to the axis limits. The predicted  $E_{FRET}$  trace (pink) for no  
 967 interaction between Cy5-OBD-RPA and the P/5'TCy3 DNA is fit to a flat line.

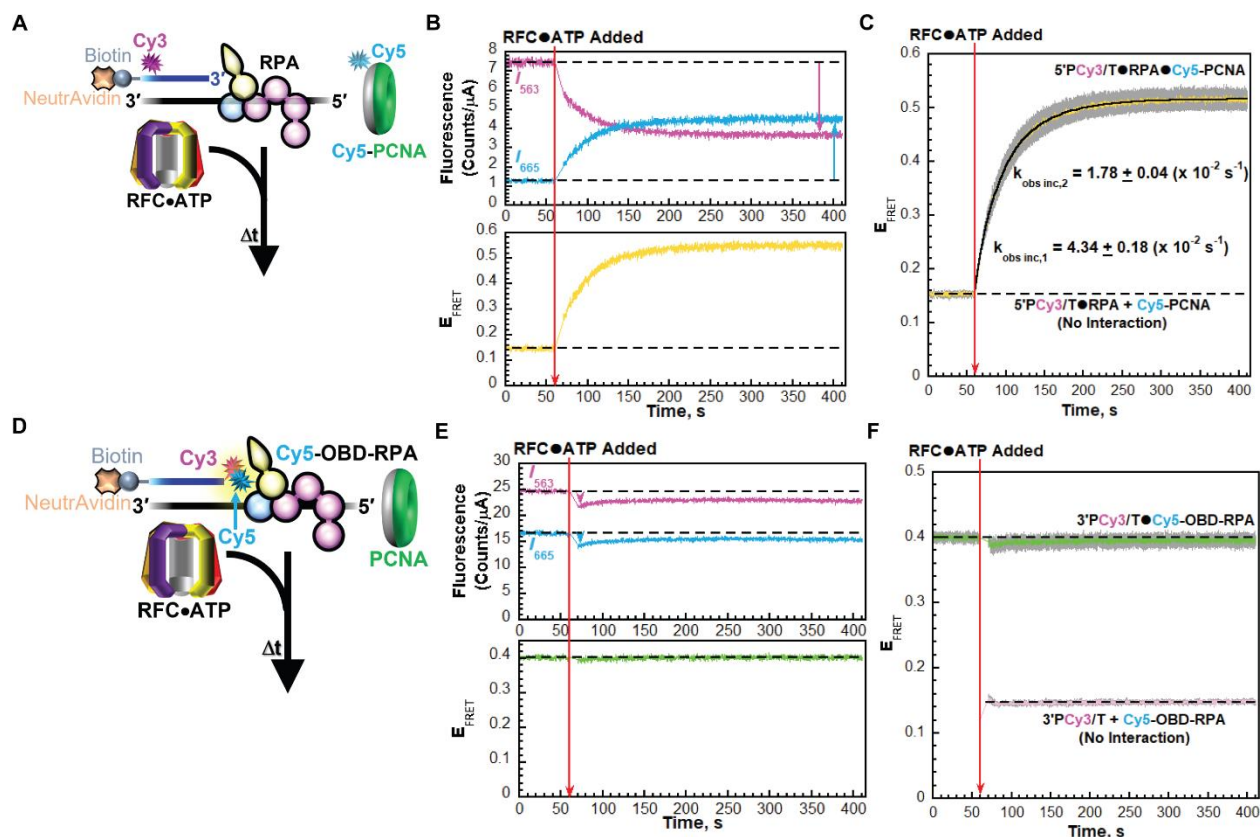

968 **Figure 5.** Interplay of RPA OBD and RFC interactions with nascent P/T junctions during PCNA  
 969 loading in the presence of ATP. (A - C) Monitoring interactions of RFC and PCNA with a P/T  
 970 junction engaged by RPA. (A) Schematic representation of the FRET experiment performed with  
 971 5'PCy3/T (+ NeutrAvidin), RPA, Cy5-PCNA and a pre-formed RFC•ATP complex. (B) Sample  
 972 time trajectories of  $I_{563}$  and  $I_{665}$  (Top) and their  $E_{\text{FRET}}$  (Bottom). The time at which the RFC•ATP  
 973 complex is added is indicated by a red arrow. Changes in  $I_{563}$  and  $I_{665}$  are indicated by magenta  
 974 and cyan arrows, respectively. For observation, the  $I_{563}$ ,  $I_{665}$ , and  $E_{\text{FRET}}$  values observed prior to  
 975 the addition of the RFC•ATP complex are fit to flat lines that are extrapolated to the axis limits.  
 976 (C) FRET data. Each  $E_{\text{FRET}}$  trace is the mean of at least three independent traces with the S.E.M.  
 977 shown in grey. The time at which the RFC•ATP complex is added is indicated by a red arrow.  
 978 The  $E_{\text{FRET}}$  trace observed prior to the addition of the RFC•ATP complex represents the complete  
 979 absence of interactions between the 5'PCy3/T•RPA complex and Cy5-PCNA and is fit to flat  
 980 line that is extrapolated to the axis limits. The  $E_{\text{FRET}}$  trace observed after the addition of the  
 981 RFC•ATP complex is fit to a double exponential rise and the observed rate constants are  
 982 reported in the graph as well as in **Table S1**. (D - F) Monitoring RPA OBD interactions with a  
 983 P/T junction that is engaged by RFC. (D) Schematic representation of the experiment. Reactions  
 984 were carried out exactly as described in panel A except with 3'PCy3/T DNA, Cy5-OBD-RPA,  
 985 and PCNA. (E) Sample time trajectory of  $I_{563}$  and  $I_{665}$  (Top) and their  $E_{\text{FRET}}$  (Bottom) are plotted  
 986 as described in panel B. (F) FRET data. Each  $E_{\text{FRET}}$  trace is the mean of at least three  
 987 independent traces with the S.E.M. shown in grey. Data is plotted as described in panel C. The  
 988  $E_{\text{FRET}}$  trace observed prior to the addition of the RFC•ATP complex is fit to a flat line that is  
 989 extrapolated to the axis limits. The predicted  $E_{\text{FRET}}$  trace (pink) for no interaction between Cy5-  
 990 OBD-RPA and the 3'PCy3/T DNA is fit to a flat line.

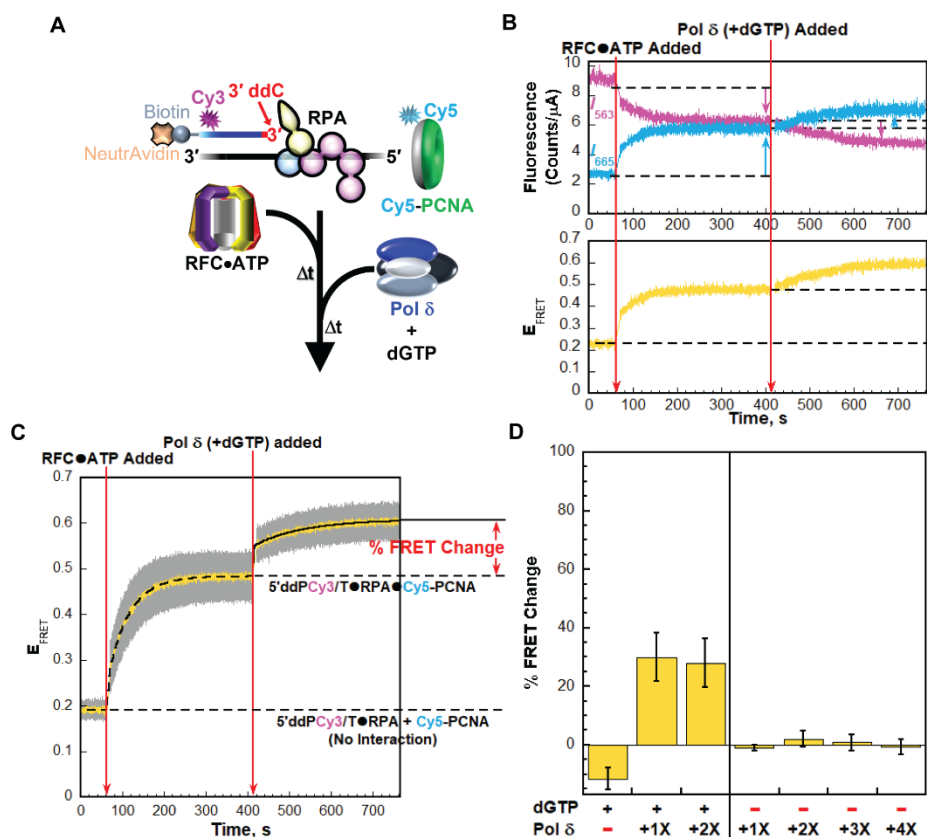

991 **Figure 6.** Formation of a Pol  $\delta$  holoenzyme at a P/T junction engaged by RPA. (A) Schematic  
 992 representation of the FRET experiment performed with 5' ddPCy3/T (+ NeutrAvidin), RPA, Cy5-  
 993 PCNA, RFC, ATP, and Pol  $\delta$  together with dGTP. (B) Sample time trajectories of  $I_{563}$  and  $I_{665}$   
 994 (*Top*) and their  $E_{\text{FRET}}$  (*Bottom*). The times at which the RFC•ATP complex and Pol  $\delta$  (+ dGTP)  
 995 are added are indicated by red arrows. For observation, the emission intensity traces and  $E_{\text{FRET}}$   
 996 values observed in the absence of RFC are each fit to dashed flat lines that are extrapolated.  
 997 Also, dashed flat lines are drawn to highlight  $I$  values and  $E_{\text{FRET}}$  values observed at equilibrium  
 998 for PCNA loading. Changes in  $I_{563}$  and  $I_{665}$  observed after each addition are indicated by magenta  
 999 and cyan arrows, respectively. (C) FRET data. Each  $E_{\text{FRET}}$  trace is the mean of at least three  
 1000 independent traces with the S.E.M. shown in grey. The times at which the RFC•ATP complex  
 1001 and Pol  $\delta$  (+ dGTP) are added are indicated by red arrows. The  $E_{\text{FRET}}$  trace observed prior to the  
 1002 addition of the RFC•ATP complex is fit to a dashed flat line that is extrapolated to the axis limits  
 1003 to depict the average  $E_{\text{FRET}}$  value for no interaction between Cy5-PCNA and the  
 1004 5' ddPCy3/T•RPA complex. The  $E_{\text{FRET}}$  trace observed after the addition of the RFC•ATP  
 1005 complex is fit to a dashed double exponential rise that is extrapolated to the axis limits to depict  
 1006 the average  $E_{\text{FRET}}$  value for complete loading of Cy5-PCNA onto the Cy3-labeled P/T DNA  
 1007 substrate (i.e., the 5' ddPCy3/T•RPA•Cy5-PCNA complex). The  $E_{\text{FRET}}$  traces observed after the  
 1008 addition of Pol  $\delta$  (+ dGTP) is fit to a double exponential rise. The % FRET Change observed  
 1009 after the addition of Pol  $\delta$  (+ dGTP) is depicted in red. (D) Characterization of the % FRET  
 1010 Change observed. FRET experiments were repeated in the presence/absence of dGTP and with  
 1011 varying concentrations of Pol  $\delta$  (0 – 100 nM heterotetramer) and the % FRET Change observed  
 1012 upon the ultimate addition (either dGTP, Pol  $\delta$  + dGTP, or Pol  $\delta$ ) was measured. Each column is  
 1013 the mean of at least three independent replicates with the S.E.M. shown in black.

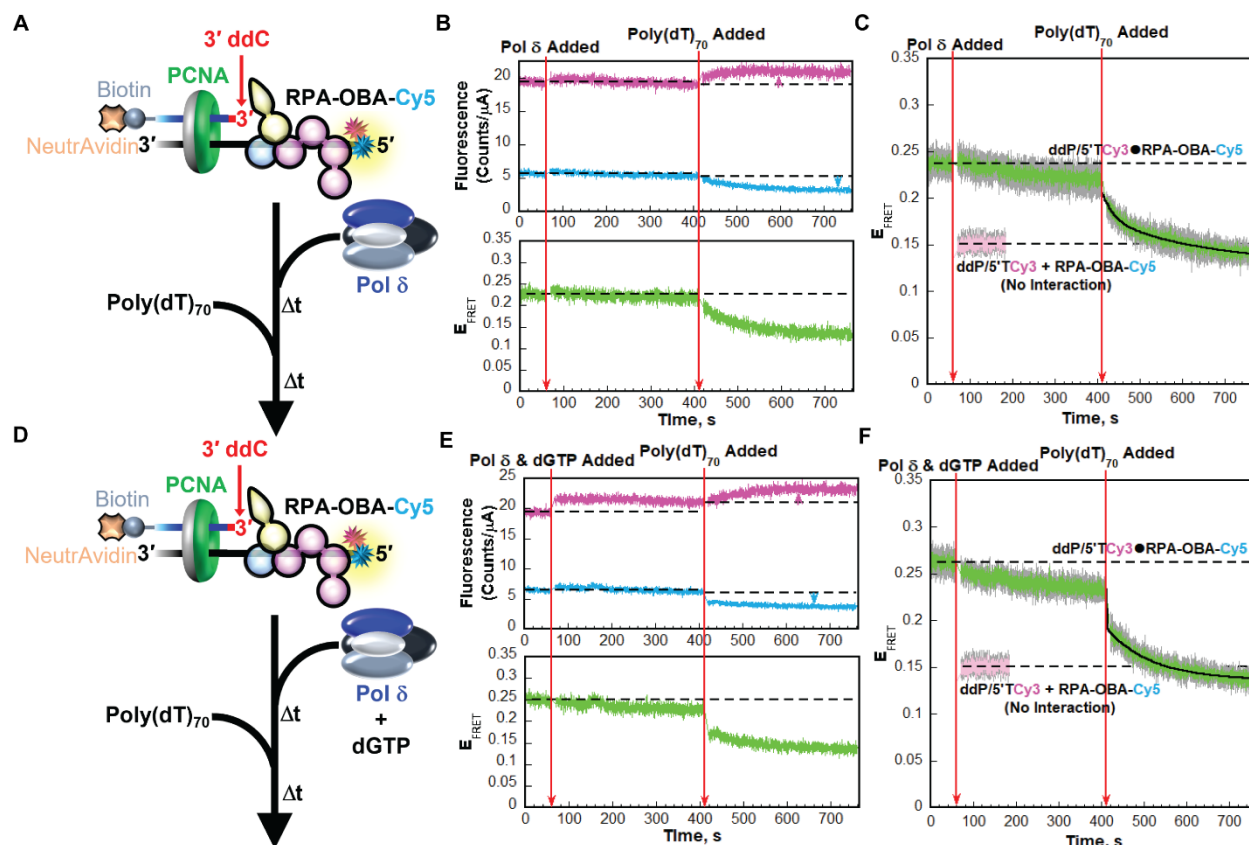

1014 **Figure 7.** RPA dynamics during formation of a Pol  $\delta$  holoenzyme and initiation of DNA  
 1015 synthesis. (A) Schematic representation of the FRET experiment performed with 5'ddP/5'TCy3  
 1016 (+ NeutrAvidin), RPA-OBA-Cy5, PCNA, RFC, ATP, Pol  $\delta$ , and poly(dT)<sub>70</sub>. (B) Sample time  
 1017 trajectories of  $I_{563}$  and  $I_{665}$  (Top) and their  $E_{\text{FRET}}$  (Bottom). The times at which Pol  $\delta$  and  
 1018 poly(dT)<sub>70</sub> are added are indicated by red arrows. For observation, the emission intensity traces  
 1019 and  $E_{\text{FRET}}$  values observed in the absence of Pol  $\delta$  are each fit to dashed flat lines that are  
 1020 extrapolated. Also, dashed flat lines are drawn to highlight the  $I$  values and  $E_{\text{FRET}}$  values  
 1021 observed at equilibrium after the addition of Pol  $\delta$ . Changes in  $I_{563}$  and  $I_{665}$  observed after the  
 1022 addition of poly(dT)<sub>70</sub> are indicated by magenta and cyan arrows, respectively. (C) FRET data.  
 1023 Each  $E_{\text{FRET}}$  trace is the mean of at least three independent traces with the S.E.M. shown in grey.  
 1024 The times at which the Pol  $\delta$  and poly(dT)<sub>70</sub> are added are indicated by red arrows. The  $E_{\text{FRET}}$   
 1025 trace observed prior to the addition of the Pol  $\delta$  is fit to a dashed flat line that is extrapolated  
 1026 to the axis limits to depict the average  $E_{\text{FRET}}$  value for the interaction between RPA-OBA-Cy5 and  
 1027 ddP/5'TCy3. The predicted  $E_{\text{FRET}}$  trace (pink) for no interaction between RPA-OBA-Cy5 and the  
 1028 ddP/5'TCy3 DNA is fit to a flat line that is extrapolated to the axis limits. The  $E_{\text{FRET}}$  trace  
 1029 observed after the addition of the poly(dT)<sub>70</sub> is fit to a double exponential decay. (D) Schematic  
 1030 representation of the FRET experiment performed in the same manner as that depicted in panel  
 1031 A except that Pol  $\delta$  is added simultaneously with dGTP. (E) Sample time trajectories of  $I_{563}$  and  
 1032  $I_{665}$  (Top) and their  $E_{\text{FRET}}$  (Bottom) plotted as in panel B. (F) FRET data plotted and analyzed as  
 1033 in panel C. Each  $E_{\text{FRET}}$  trace is the mean of at least three independent traces with the S.E.M.  
 1034 shown in grey.

1035  
 1036

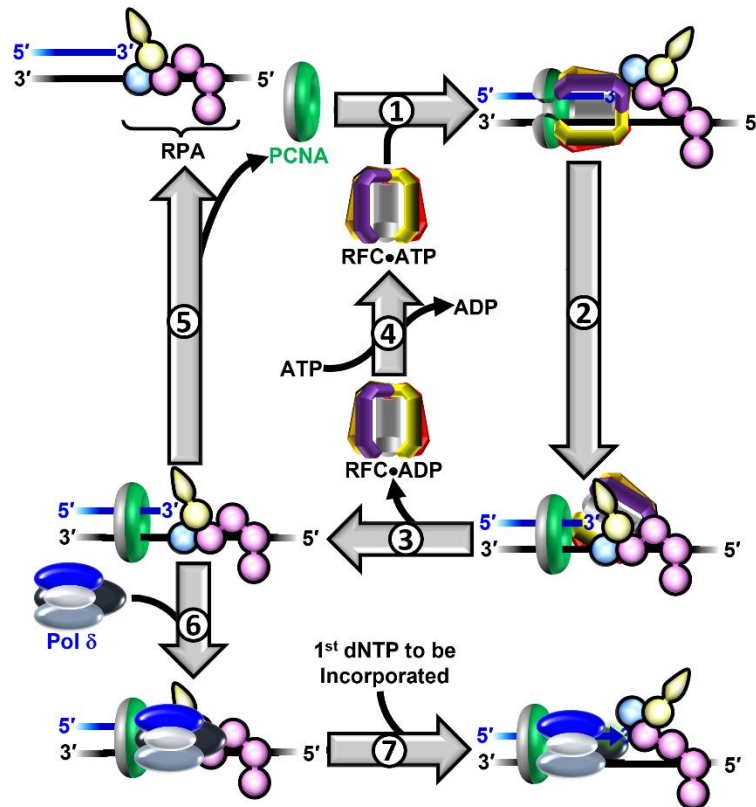

1037 **Figure 8.** Assembly of the human Pol  $\delta$  holoenzyme and initiation of DNA synthesis. A nascent  
 1038 P/T junction is pre-engaged by RPA in an orientation-specific manner (as depicted) and PCNA  
 1039 resides in solution (*Top Left*). **1)** RFC•ATP engages the "front face" of a free PCNA in solution,  
 1040 opens the sliding clamp, and the resultant loading complex engages a nascent P/T junction such  
 1041 that the "front face" of PCNA is oriented towards the 3' terminus of the primer from which DNA  
 1042 synthesis initiates. Upon engaging a nascent P/T junction, the loading complex adopts an  
 1043 activated conformation in which ATP hydrolysis by RFC is optimized. RPA OBD is released  
 1044 from the 3' terminus of the primer strand to accommodate binding and activation of the loading  
 1045 complex at the nascent P/T junction. **2)** ATP hydrolysis by RFC within the activated loading  
 1046 complex simultaneously closes PCNA around the DNA and the closed (i.e., loaded) PCNA is  
 1047 subsequently released onto the dsDNA region of the nascent P/T junction. Concomitant with  
 1048 closure of PCNA or release of loaded PCNA, the resultant RFC•ADP complex vacates the P/T  
 1049 junction, transferring to the RPA1 subunit, and the interactions of RPA OBD are re-established  
 1050 with the 3' terminus of the primer strand. **3)** The RFC•ADP complex releases into solution via  
 1051 dissociation from the RPA1 subunit of the resident RPA engaged with the nascent P/T junction.  
 1052 **4)** RFC then exchanges ADP for ATP. **5)** In the absence of catalyzed unloading of PCNA and  
 1053 significant translocation of loaded PCNA, the only pathway for dissociation of Pol  $\delta$ , loaded  
 1054 PCNA may dissociate from a nascent P/T junction via spontaneous opening of the PCNA ring. **6)**  
 1055 In the presence of Pol  $\delta$ , the DNA polymerase engages the "front face" of loaded PCNA  
 1056 encircling a P/T junction, forming a holoenzyme. **7)** An assembled Pol  $\delta$  holoenzyme engages a  
 1057 nascent P/T junction and an incoming dNTP and aligns the incoming dNTP at the 3' terminus of  
 1058 the primer strand in a correct base pair with the template nt immediately 5' of the P/T junction.  
 1059

## 1060 Supplemental Information

### 1061 TITLE: **Interplay of macromolecular interactions during assembly of human DNA** 1062 **polymerase $\delta$ holoenzymes and initiation of DNA synthesis**

1063  
1064 Jessica L. Norris<sup>1</sup>, Lindsey O. Rogers<sup>1</sup>, Kara G. Pytko<sup>1</sup>, Rachel L. Dannenberg<sup>1</sup>, Samuel  
1065 Perreault<sup>1</sup>, Vikas Kaushik<sup>2</sup>, Sahiti Kuppa<sup>2</sup>, Edwin Antony<sup>2</sup>, and Mark Hedglin<sup>1,\*</sup>

1066 \*Corresponding author, to whom correspondence may be addressed: Email: [muh218@psu.edu](mailto:muh218@psu.edu)

### 1067 Affiliations:

1068 <sup>1</sup>The Pennsylvania State University, Department of Chemistry, University Park PA, 16802

1069 <sup>2</sup>The Saint Louis University School of Medicine, Department of Biochemistry and Molecular  
1070 Biology, St. Louis MO, 63104

### 1071 Supplementary Results

1072 *Experimental reaction buffer components do not affect the amount of RPA that binds to ssDNA*  
1073 *nor the amount of PCNA loaded onto DNA by RFC.*

1074 Calcium ( $\text{Ca}^{2+}$ ) is included in all experimental reaction buffers in the current study to account  
1075 for experimental conditions in future studies. Rigorous control experiments were carried out to  
1076 demonstrate that the results presented in the present study are not attributed to indirect effects of  
1077 buffer components. We initially focused on RPA-DNA interactions. First, the concentration of  
1078 active RPA heterotrimer was calculated as previously described in 1X  $\text{Mg}^{2+}$  buffer (25 mM  
1079 HEPES, pH 7.5, 125 mM KOAc, 10 mM  $\text{Mg}(\text{OAc})_2$ ) supplemented with 1 mM DTT, 1 mM  
1080 ATP, and ionic strength adjusted to 200 mM by addition of KOAc<sup>1</sup>. The ssDNA substrate  
1081 utilized in these assays (poly(dT)<sub>30</sub>-FRET) accommodates one RPA heterotrimer and is shown in  
1082 **Figure S1**. Next, these titrations were repeated in the same experimental reaction buffer except  
1083 with amended amounts of RPA heterotrimer that accounted for the calculated concentration of  
1084 active RPA heterotrimer (**Figure S2A**) and the data ( $E_{\text{FRET}}$  values) is plotted as a function of the  
1085 ratios of the concentrations of active RPA heterotrimer and DNA (i.e., [RPA]:[DNA], **Figure**  
1086 **S2B**). As expected, saturation occurs at a ratio of 1:1 ( $1.017 \pm 0.0545$  [RPA]:[DNA]). Finally,  
1087 these experiments were repeated with the same preparation of human RPA heterotrimer except in  
1088 1X  $\text{Mg}^{2+}/\text{Ca}^{2+}$  buffer. In this  $\text{Mg}^{2+}/\text{Ca}^{2+}$  buffer,  $\text{Ca}^{2+}$  is included in addition to magnesium ( $\text{Mg}^{2+}$ )  
1089 and the acetate ( $\text{OAc}^-$ ) from  $\text{Mg}^{2+}$  buffer is replaced with chloride ( $\text{Cl}^-$ ). As observed in **Figure**  
1090 **S2C**, saturation occurs in 1X  $\text{Mg}^{2+}/\text{Ca}^{2+}$  buffer at ratio ( $0.938 \pm 0.0507$  [RPA]:[DNA]) that is  
1091 within experimental error of that observed in 1X  $\text{Mg}^{2+}$  buffer ( $1.017 \pm 0.0545$  [RPA]:[DNA],  
1092 **Figure S2C**). This indicates that experimental reaction buffer components do not affect the  
1093 amount of RPA that binds to ssDNA. Next, we focused on RFC-catalyzed loading of PCNA onto  
1094 a P/T junction.

1095 RFC-catalyzed loading of PCNA onto nascent P/T junctions that are engaged with RPA was  
1096 monitored exactly as described in **Figure 3** in the main text. Under the conditions of the assay,  
1097 PCNA loading is biphasic and stoichiometric<sup>2,3</sup>. Shown in **Figure S3A – B** is the data observed  
1098 in 1X  $\text{Mg}^{2+}$  buffer. Upon addition of RFC, the observed changes in  $I_{665}$  and  $I_{563}$  are synchronized  
1099 and anti-correlated (**Figure S3A, Top**), indicating the appearance and increase in FRET (**Figure**  
1100 **S3A, Bottom**). As observed in **Figure S3B**,  $E_{\text{FRET}}$  traces rapidly increase to values significantly  
1101 above the  $E_{\text{FRET}}$  values observed for no interaction between Cy5-PCNA and the

1102 5' ddPCy3/T•RPA complex. As expected, the rapid increase in  $E_{\text{FRET}}$  observed upon addition of  
1103 RFC•ATP is biphasic with observed rate constants of  $k_{\text{obs inc},1} = 0.122 \pm 0.004 \text{ s}^{-1}$  and  $k_{\text{obs inc},2} =$   
1104  $1.28 \pm 0.05 \text{ (x } 10^{-2}) \text{ s}^{-1}$  (reported in **Table S1**) and an overall (i.e., total) amplitude of  $A_{\text{T}} = 0.351$   
1105  $\pm 0.019$ . Importantly, the rate constants observed in **Figure S3B** agree very well with values  
1106 reported in a previous study ( $k_{\text{obs inc},1} = 0.134 \pm 0.010 \text{ s}^{-1}$  and  $k_{\text{obs inc},2} = 2.03 \pm 0.03 \text{ (x } 10^{-2}) \text{ s}^{-1}$ )  
1107 that analyzed PCNA loading under similar conditions by monitoring sensitized Cy5 acceptor  
1108 fluorescence emission intensity ( $I_{665}$ ) via stopped flow. Under these conditions,  $k_{\text{obs inc},1}$  describes  
1109 a kinetic step along the PCNA loading pathway that occurs prior to and much slower than  
1110 binding of the loading complex to the nascent P/T junction.  $k_{\text{obs inc},2}$  describes release of the  
1111 RFC•ADP complex into solution via dissociation from RPA engaged with the nascent P/T  
1112 junction<sup>2</sup>. The overall amplitude ( $A_{\text{T}}$ ) indicates the overall increase in FRET observed upon  
1113 stable loading of a single Cy5-PCNA onto each 5' ddPCy3/T DNA substrate. Shown in **Figure**  
1114 **S3C – D** is the data observed in 1X  $\text{Mg}^{2+}/\text{Ca}^{2+}$  buffer.  $E_{\text{FRET}}$  traces observed upon addition of  
1115 RFC•ATP are also biphasic. Importantly, the overall amplitude observed in **Figure S3D** ( $A_{\text{T}} =$   
1116  $0.368 \pm 0.014$ ) is within experimental error of that observed in the alternative buffer ( $A_{\text{T}} = 0.351$   
1117  $\pm 0.019$ , **Figure S3B**), indicating that experimental reaction buffer components do not affect the  
1118 amount of PCNA loaded onto DNA by RFC.  $k_{\text{obs},2}$  observed in **Figure S3D** ( $k_{\text{obs inc},2} = 1.72 \pm$   
1119  $0.02 \text{ (x } 10^{-2}) \text{ s}^{-1}$ , **Table S1**) agrees very well with that observed in **Figure S3B** for the alternative  
1120 buffer ( $k_{\text{obs inc},2} = 2.03 \pm 0.03 \text{ (x } 10^{-2}) \text{ s}^{-1}$ , **Table S1**) suggesting that  $k_{\text{obs inc},2}$  under these  
1121 conditions also represents release of the RFC•ADP complex into solution via dissociation from  
1122 RPA engaged with the nascent P/T junction.  $k_{\text{obs inc},1}$  observed for each experimental reaction  
1123 buffer are within 2-fold of each other. This suggests either that  $k_{\text{obs inc},1}$  describes either; 1) the  
1124 same kinetic step(s) for each condition and, hence, this step is dependent on the experimental  
1125 reaction buffer components; or 2) a distinct step(s) for each condition. Regardless, the identical  
1126 total amplitudes ( $A_{\text{T}}$ ) observed in **Figure S3** indicate that both experimental reaction buffers  
1127 fully support RFC-catalyzed loading of PCNA onto P/T junctions.

1128  
1129 *RPA rapidly engages a nascent P/T junction in a stable interaction.*

1130 To investigate RPA/DNA interactions at P/T junctions, we designed and carried out FRET  
1131 assays utilizing Cy3, Cy5 FRET pairs comprised of a Cy3-labeled P/T DNA substrate (**Figure**  
1132 **S1**) and a corresponding Cy5-labeled RPA. To monitor interactions of RPA OBA with P/T DNA  
1133 we utilized a substrate (**Figure S4A**, ddP/5'TCy3 DNA) with a 3' dideoxy-terminated primer and  
1134 a Cy3 donor near the 5' end of the template strand and RPA with a Cy5 acceptor on OBA  
1135 (**Figure S4B**, RPA-OBA-Cy5) that faces the Cy3 donor (**Figure S4C**)<sup>4-11</sup>. To monitor  
1136 interactions of RPA OBD with P/T DNA we utilized a substrate (**Figure S4D**, 3'PCy3/T) with a  
1137 Cy3 donor on the 3' terminus of the primer strand and RPA with a Cy5 acceptor on OBD  
1138 (**Figure S4E**, Cy5-OBD-RPA) that faces the Cy3 donor (**Figure S4F**)<sup>12</sup>. Each Cy3-labeled P/T  
1139 junction was tested for stable interaction with the corresponding Cy5-labeled RPA by monitoring  
1140 the FRET signals observed at equilibrium after excitation with 514 nm light. Here, Cy5 on RPA  
1141 can be excited via FRET from Cy3 on a P/T junction only when the two cyanine labels remain in  
1142 close proximity of each other (i.e.,  $\leq 10 \text{ nm}$ ), as depicted in **Figures S4C** and **S4F**. This is  
1143 indicated by an increase in the fluorescence emission intensity of the Cy5 acceptor at 665 nm  
1144 (Cy5 acceptor fluorescence emission maximum,  $I_{665}$ ) and a concomitant decrease in the  
1145 fluorescence emission intensity of the Cy3 donor at 563 nm (Cy3 donor fluorescence emission  
1146 maximum,  $I_{563}$ ). A FRET signal is clearly observed for both Cy3, Cy5 FRET pairs only when  
1147 both the respective Cy3-labeled P/T junction and the corresponding Cy5-labeled RPA are present

1148 **(Figure S4G and S4H)**. Collectively, this indicates that RPA engages a P/T junction in a stable  
1149 interaction. This equilibrium FRET assay was adapted to determine the concentrations of active  
1150 Cy5-labeled RPAs **(Figure S5)**.

1151 To analyze the kinetics of RPA binding to nascent P/T junctions **(Figure S6A)**,  $I_{563}$  and  $I_{665}$   
1152 are first monitored over time for ddP/5'TCy3 DNA alone. Then, the fluorescence emission  
1153 intensity recording is paused, RPA-OBA-Cy5 is added to the reaction mixture, the resultant  
1154 solution is mixed, and the fluorescence emission intensity recording is resumed within 10 s of the  
1155 addition (i.e., “dead time”  $\leq 10$  s). Upon addition of RPA-OBA-Cy5,  $I_{665}$  rapidly increases  
1156 concomitantly with a rapid decrease in  $I_{563}$  **(Figure S6B, Top)** after which both fluorescence  
1157 emission intensities stabilize and persist over time. These synchronized, anti-correlated changes  
1158 in  $I_{563}$  and  $I_{665}$  are indicative of the appearance and increase in FRET **(Figure S6B, Bottom)**. As  
1159 observed in **Figure S6C**,  $E_{\text{FRET}}$  traces rapidly increase to values significantly above the  $E_{\text{FRET}}$   
1160 traces predicted for no interaction between RPA-OBA-Cy5 and ddP/5'TCy3 DNA. Furthermore,  
1161 the rapid increase in  $E_{\text{FRET}}$  observed upon addition of RPA-OBA-Cy5 is comprised of at least  
1162 two phases (i.e., biphasic) with an observed rate constant for the slower phase ( $k_{\text{obs inc},2}$ ) of  $9.45 \times$   
1163  $10^{-3} \pm 2.23 \times 10^{-3} \text{ s}^{-1}$ . Similar results are observed for the 3'PCy3/T DNA, Cy5-OBD-RPA FRET  
1164 pair **(Figure S6D – F)** except that association of the Cy5-labeled OBD of RPA with the Cy3-  
1165 labeled P/T junction is completed within the dead time of the experiment ( $\leq 10$  s). This behavior  
1166 agrees with previous studies that observed differential kinetics for binding of OBA and OBD to  
1167 ssDNA in the context of the complete, heterotrimeric RPA complex<sup>12-14</sup>. Altogether, the results  
1168 presented in **Figures S4 and S6** indicate that RPA rapidly engages P/T junctions in a stable  
1169 interaction.

1170  
1171 *PCNA is loaded onto a P/T junction in 1:1 stoichiometry regardless of the position of the Cy3*  
1172 *label.*

1173 In order to investigate the effects of the Cy3 donor located at the 3' primer terminus of the of  
1174 the 3'PCy3/T DNA substrate **(Figure S1)** on RFC-catalyzed loading of PCNA, we carried out  
1175 PCNA loading experiments under two different conditions. First, we investigated the kinetics of  
1176 PCNA loading by carrying out PCNA loading reactions in the presence of ATP exactly as  
1177 described in in the main text except with 3'Cy3P/T DNA **(Figure S9A)**. In short, 20 nM  
1178 3'PCy3/T DNA (pre-bound with 80 nM NeutrAvidin and 1 mM ATP are pre-incubated with 25  
1179 nM wild type RPA. Then, 20 nM Cy5-PCNA is added. PCNA loading is initiated by the addition  
1180 of 20 nM pre-formed RFC•ATP complex and monitored via FRET over time **(Figure S9B)**.  
1181 Under these conditions the concentrations of RFC, PCNA, and P/T DNA are stoichiometric (i.e.,  
1182 1:1:1). As observed in **Figure S9C**,  $E_{\text{FRET}}$  traces rapidly increase to values significantly above  
1183 the  $E_{\text{FRET}}$  values observed for no interaction between Cy5-PCNA and the 3'PCy3/T•RPA  
1184 complex. The rapid increase in  $E_{\text{FRET}}$  observed upon addition of RFC is biphasic with observed  
1185 rate constants of  $k_{\text{obs inc},1} = 4.42 \pm 0.10 (\times 10^{-2}) \text{ s}^{-1}$  and  $k_{\text{obs inc},2} = 1.59 \pm 0.09 (\times 10^{-2}) \text{ s}^{-1}$  **(Table**  
1186 **S1)**. The rate constants observed for the 3'Cy3P/T DNA substrate **(Figure S9C, Table S1)** are  
1187 nearly identical to those observed for the 5'Cy3P/T DNA substrate **(Table S1)**, indicating that  
1188 the Cy3 label on the 3' terminus of the primer of the 3'Cy3P/T DNA substrate does not affect  
1189 kinetics of RFC-catalyzed loading of PCNA onto P/T junctions. The overall total amplitude ( $A_{\text{T}}$ )  
1190 observed for the 3'Cy3P/T DNA substrate **(Figure S9C)** is  $> 2$ -fold less than that observed for  
1191 the 5'Cy3P/T DNA substrate, likely due to the Cy5 label on PCNA being oriented away from the  
1192 Cy3 donor (rather than towards) when Cy5-PCNA is loaded onto the 3'Cy3P/T DNA substrate  
1193 by RFC. Next, we investigated the stoichiometry of PCNA loading by characterizing the overall



1194 total amplitudes ( $A_T$ ) of PCNA loading via a titration of the  $E_{FRET}$  signal observed at equilibrium  
1195 (i.e., when  $A_T$  has been achieved). In short, a Cy3-labeled P/T DNA (55 nM of either 5'Cy3P/T  
1196 or 3'Cy3P/T pre-bound with 220 nM NeutrAvidin) is pre-saturated with wild type RPA prior to  
1197 the addition of RFC (55 nM). Cy5-PCNA is then titrated in and the equilibrium  $E_{FRET}$  is  
1198 monitored. As expected for the 5'PCy3/T DNA substrate,  $E_{FRET}$  increased linearly with Cy5-  
1199 PCNA up to a Cy5-PCNA: Cy3-DNA ratio of 1:1 after which the  $E_{FRET}$  values remain constant  
1200 (**Figure S10**)<sup>2,3</sup>. This confirms the validity of the approach and that RFC-catalyzed loading of  
1201 PCNA onto the 5'PCy3/T DNA substrate is stoichiometric. For the 3'PCy3/T DNA substrate,  
1202 identical behavior is observed. This indicates that the location of the Cy3 label on the primer  
1203 strand does not affect the amount of PCNA loaded onto DNA by RFC. Together, the results  
1204 presented in **Figures S9** and **S10** demonstrate that the Cy3 donor located at the 3' primer  
1205 terminus of the of the 3'PCy3/T DNA substrate has no effect on RFC-catalyzed loading of  
1206 PCNA on the resident P/T junction.

1207  
1208 *dGTP inhibits RFC-catalyzed re-loading of PCNA onto a P/T junction.*

1209 In the current study, RFC-catalyzed loading of PCNA onto a P/T junction in the presence of  
1210 ATP is stoichiometric. After dissociation of the RFC•ADP complex into solution, the loaded  
1211 PCNA is left behind on the duplex region of the P/T junction and randomly and rapidly diffuses  
1212 along the double-stranded DNA (dsDNA)<sup>15</sup>. Recent *in vivo* evidence suggests that enzyme-  
1213 catalyzed unloading of PCNA from a P/T junction will not occur until the primer is completely  
1214 extended and ligated to the downstream duplex region<sup>16</sup>. Physical blocks i.e., “protein  
1215 roadblocks,” restrict translocation of PCNA away from the P/T junction via diffusion. Diffusion  
1216 of loaded PCNA along the duplex region is restricted by high-affinity DNA-binding proteins,  
1217 such as histones and transcription factors, that rapidly bind nascent dsDNA upstream of P/T  
1218 junctions during S-phase of the cell cycle when DNA replication occurs. This is emulated in the  
1219 current study by the biotin-NeutrAvidin complex at the blunt duplex end of the DNA substrates.  
1220 RPA engaged with the ssDNA downstream of nascent P/T junctions prohibits diffusion of loaded  
1221 PCNA along ssDNA as well as RFC-catalyzed unloading of PCNA<sup>2,3</sup>. In the absence of  
1222 catalyzed unloading of PCNA and significant translocation of loaded PCNA, the only pathway  
1223 for dissociation of loaded PCNA from a nascent P/T junction is through spontaneous opening of  
1224 the PCNA ring, which is dramatically slow [ $k_{open} = 1.25 \pm 0.32 (x 10^{-3}) s^{-1}$ ]<sup>17</sup>, ~20-fold slower  
1225 than the observed rate constant RFC-catalyzed loading of “free” PCNA onto a P/T junction in  
1226 the presence of ATP (**Figure 3, 5, S3, S3 – S9**, and **Table 1**). This suggests that, upon  
1227 dissociation of PCNA from a nascent P/T junction via spontaneous opening of the PCNA ring,  
1228 RFC utilizes ATP to instantly reload PCNA back onto the nascent P/T junction such that the loss  
1229 of loaded PCNA from a nascent P/T junction and, hence,  $E_{FRET}$ , is not observed<sup>2,18</sup>. To directly  
1230 confirm this, we continuously analyzed DNA-PCNA interactions over time as reaction  
1231 conditions progressively evolved (**Figure S11A**). First, the 5'ddPCy3/T DNA substrate is pre-  
1232 saturated with native RPA, Cy5-PCNA is added, and  $I_{563}$  and  $I_{665}$  are monitored over time. Next,  
1233 pre-formed RFC•complex is added to the and the fluorescence emission intensities are  
1234 monitored over time until PCNA loading is complete. Under the conditions of the assay, PCNA  
1235 loading is stoichiometric and biphasic<sup>2</sup>. Finally, unlabeled PCNA is added in excess and the  
1236 fluorescence emission intensities are monitored over time. Under these conditions, once loaded  
1237 Cy5-PCNA dissociates from the Cy3-labeled P/T junction via spontaneous opening of the PCNA

1238 ring, re-loading of “free” Cy5-PCNA is prohibited due to the 70-fold excess of unlabeled PCNA,  
1239 and consequently the observed FRET decreases. Here, the disappearance of FRET is rate-limited  
1240 by and directly reports on spontaneous opening of the PCNA ring.

1241 Upon addition of RFC•ATP,  $I_{665}$  rapidly increases concomitantly with a rapid decrease in  $I_{563}$   
1242 after which both fluorescence emission intensities stabilize and persist over time (**Figure S11B**,  
1243 *Top*). These synchronized, anti-correlated changes in  $I_{563}$  and  $I_{665}$  are indicative of the  
1244 appearance and increase in FRET (**Figure S11B**, *Bottom*). As expected,  $E_{\text{FRET}}$  traces observed in  
1245 **Figure S11C** rapidly increase in a biphasic manner upon addition of RFC•ATP and plateau at  
1246 values significantly above the  $E_{\text{FRET}}$  traces observed for no interaction between Cy5-PCNA and  
1247 5’ddPCy3/T. At this point, a Cy5-PCNA has been loaded onto each 5’ddPCy3/T DNA and  
1248 RFC•ADP has released into solution and exchanged ADP for ATP. Both observed rate constants  
1249 for RFC-catalyzed loading of PCNA in the presence of ATP are in excellent agreement with  
1250 results from the current study obtained under the same experimental conditions (**Table S1**).  $k_{\text{obs}}$   
1251  $_{\text{inc}, 1}$  (in **Figure S11C**), which encompasses all kinetic steps along the PCNA loading pathway up  
1252 to and including release of loaded PCNA onto P/T DNA, is  $4.46 \pm 0.29$  ( $\times 10^{-2}$ )  $\text{s}^{-1}$ .  $k_{\text{obs}, \text{inc}, 2}$  (in  
1253 **Figure S11C**), which reports on release of RFC•ADP into solution (via its dissociation from the  
1254 resident RPA engaged with the P/T junction) is  $1.70 \pm 0.12$  ( $\times 10^{-2}$ )  $\text{s}^{-1}$ .

1255 Upon addition of excess, unlabeled PCNA, the observed changes in  $I_{665}$  and  $I_{563}$  are  
1256 synchronized and anti-correlated (**Figure S11B**, *Top*), indicating a decrease in FRET (**Figure**  
1257 **S11B**, *Bottom*). As observed in **Figure S11C**, upon addition of excess unlabeled PCNA,  $E_{\text{FRET}}$   
1258 traces decrease to  $E_{\text{FRET}}$  values observed for no interaction between Cy5-PCNA and 5’ddPCy3/T  
1259 DNA (i.e., all Cy5-PCNA remaining “free” in solution) indicating that all Cy5-PCNA dissociates  
1260 from the 5’ddPCy3/T•RPA complex. Furthermore, the decrease in  $E_{\text{FRET}}$  observed upon addition  
1261 of excess unlabeled PCNA is comprised of a single phase (i.e., monophasic) with an observed  
1262 rate constant [ $k_{\text{obs}, \text{dec}} = 1.93 \pm 0.01$  ( $\times 10^{-3}$ )  $\text{s}^{-1}$ ] that is in excellent agreement with the rate  
1263 constant for spontaneous opening of the PCNA ring [ $k_{\text{open}} = 1.25 \pm 0.32$  ( $\times 10^{-3}$ )  $\text{s}^{-1}$ ]<sup>17</sup> and is 23.1  
1264  $\pm 1.50$ -fold slower than the rate constant for RFC-catalyzed loading of “free” PCNA onto a P/T  
1265 junction in the presence of ATP [ $k_{\text{obs}, \text{inc}, 1} = 4.46 \pm 0.29$  ( $\times 10^{-2}$ )  $\text{s}^{-1}$ ]. Altogether, this confirms  
1266 that; 1) dissociation of PCNA from nascent P/T junctions is governed entirely by spontaneous  
1267 opening of the PCNA ring; and 2) upon dissociation of PCNA from a nascent P/T junction,  
1268 RFC•ATP instantly reloads PCNA back onto the nascent P/T junction such that the loss of  
1269 loaded PCNA from a nascent P/T junction is not observed. In other words, RFC together with  
1270 ATP continuously maintain loaded PCNA on all P/T junctions.

1271 Interestingly, when the experiments described in **Figure S11** and **Figure 6** (in the main text)  
1272 were repeated by replacing unlabeled PCNA and Pol  $\delta$ , respectively with dGTP (1 mM final  
1273 concentration, **Figure S12A**),  $I_{665}$  decreases slightly over time concomitantly with a slight  
1274 increase in  $I_{563}$  over time (**Figure S12B**, *Top*). These synchronized, anti-correlated changes in  
1275  $I_{563}$  and  $I_{665}$  are indicative of a decrease in FRET (**Figure S12B**, *Bottom*). As observed in **Figure**  
1276 **S12C**, upon addition of dGTP,  $E_{\text{FRET}}$  traces very slightly, but reproducibly, decrease (% FRET  
1277 Change =  $-11.7 \pm 3.7$  %) with an observed rate constant [ $k_{\text{obs}, \text{dec}} = 3.75 \pm 0.41$  ( $\times 10^{-3}$ )  $\text{s}^{-1}$ ] that  
1278 agrees with the rate constant observed in **Figure S11C** [ $k_{\text{obs}, \text{dec}} = 1.93 \pm 0.01$  ( $\times 10^{-3}$ )  $\text{s}^{-1}$ ] for  
1279 PCNA unloading via spontaneous opening of the PCNA ring. This suggests that; 1) PCNA  
1280 dissociates from the P/T junction under these conditions via spontaneous opening of the PCNA  
1281 ring; and 2) dGTP (at a concentration of 1 mM) inhibits RFC-catalyzed reloading of PCNA back  
1282 onto the P/T junction. Regarding the latter point, previous studies of human RFC observed that

1283 dGTP decreases DNA-dependent nucleotide triphosphate hydrolysis by RFC approximately 4-  
1284 fold and significantly tempers PCNA-dependent stimulation of Pol  $\delta$ -mediated DNA synthesis  
1285 by ~8-fold, suggesting that dGTP significantly inhibits loading of PCNA onto P/T junctions by  
1286 RFC<sup>19</sup>. To directly test this, we repeated PCNA loading assays (described in **Figures 3, 5, S3,**  
1287 **and S7 – S9**) in the presence of dGTP (**Figure S13**).

1288 Upon addition of RFC•dGTP, the observed changes in  $I_{665}$  and  $I_{563}$  are synchronized and  
1289 correlated (**Figure 13B, Top**). This behavior is due to nonspecific effects<sup>20</sup>. For the example  
1290 FRET trajectory depicted in **Figure 13B (Bottom)**,  $E_{\text{FRET}}$  values observed prior to the addition of  
1291 the RFC•dGTP complex are maintained after addition of the RFC•dGTP loading complex. For  
1292 the averaged  $E_{\text{FRET}}$  trajectory depicted in **Figure S13C**, the  $E_{\text{FRET}}$  traces observed prior to the  
1293 addition of the RFC•dGTP complex persist and are maintained at the  $E_{\text{FRET}}$  values observed for  
1294 no interaction between Cy5-PCNA and the 5' ddPCy3/T•RPA complex. This indicates that dGTP  
1295 (at a concentration of 1 mM) prohibits loading of PCNA onto P/T junctions by RFC under these  
1296 conditions and, hence, likely inhibits re-loading of PCNA when it is added (at a concentration of  
1297 1 mM) after a significant incubation time (in **Figure S12** and **Figure 6**) where ATP has been  
1298 depleted and ADP has increased through spontaneous hydrolysis of ATP and RFC-catalyzed  
1299 PCNA loading and re-loading.

1300

1301 *Human RPA undergoes facilitated exchange with free ssDNA.*

1302 The human RPA complex has exceptionally high affinity for ssDNA at physiological ionic  
1303 strength but can undergo facilitated exchange due to the dynamic ssDNA-binding interactions of  
1304 its individual OB folds, enabling the human RPA complex to rapidly exchange between free and  
1305 ssDNA-bound states when free, high-affinity ssDNA-binding proteins are present in solution. In  
1306 this process, human RPA complexes exist in microscopically dissociated states that only undergo  
1307 macroscopic dissociation when free, high-affinity ssDNA-binding proteins are available to  
1308 occupy the ssDNA that is exposed during the microscopic dissociation events<sup>12,13,21,22</sup>.  
1309 Accordingly, this concentration-dependent RPA turnover should also be observed when free  
1310 ssDNA is present in solution. Here, microscopically dissociated states of RPA complexes only  
1311 undergo macroscopic dissociation when free ssDNA sequences are available to occupy the OB  
1312 folds of RPA that are exposed during the microscopic dissociation events. This behavior is akin  
1313 to intersegmental transfer of DNA-binding proteins that contain at least two DNA binding  
1314 domains<sup>23</sup>. To test this, we analyzed the kinetics of RPA dissociation from nascent P/T junctions  
1315 (**Figure S14A**).

1316 First, ddP/5' TCy3 DNA is pre-incubated with RPA-OBA-Cy5 at a ratio of 1:1 and  $I_{563}$  and  
1317  $I_{665}$  of the resultant mixture are monitored over time. Then, the fluorescence emission intensity  
1318 recording is paused, buffer containing varying concentrations of free poly(dT)<sub>70</sub> is added to the  
1319 reaction mixture, the resultant solution is mixed, and the fluorescence emission intensity  
1320 recording is resumed within 10 s of the addition (i.e., “dead time”  $\leq 10$  s). The ssDNA binding  
1321 affinity of human RPA is highest for poly(dT) and each poly(dT)<sub>70</sub> accommodates at least two  
1322 RPA complexes<sup>4-6,24</sup>. Hence, poly(dT)<sub>70</sub> serves as an effective trap to release RPA-OBA-Cy5  
1323 from the ddP/5' TCy3 DNA substrate via facilitated exchange and prohibit re-binding. Upon  
1324 addition of 0.25  $\mu\text{M}$  poly(dT)<sub>70</sub>, the observed changes in  $I_{665}$  and  $I_{563}$  are synchronized and anti-  
1325 correlated (**Figure S14B, Top**), indicating a decrease in FRET (**Figure S14B, Bottom**). As  
1326 observed in **Figure S14C**,  $E_{\text{FRET}}$  traces observed in the presence of 0.25  $\mu\text{M}$  poly(dT)<sub>70</sub> rapidly  
1327 decrease to the  $E_{\text{FRET}}$  traces predicted for no interaction between RPA-OBA-Cy5 and  
1328 ddP/5' TCy3 DNA. Furthermore, the rapid decrease in  $E_{\text{FRET}}$  observed upon addition of

1329 poly(dT)<sub>70</sub> is comprised of at least two phases (i.e., biphasic) with an observed rate constants of  
1330  $k_{\text{obs dec},1} = 9.02 \pm 0.49 \text{ (x}10^{-2}\text{) s}^{-1}$  and  $k_{\text{obs dec},2} = 7.09 \pm 0.13 \text{ (x}10^{-3}\text{) s}^{-1}$ . As expected, RPA-OBA-  
1331 Cy5 remained tightly bound to the ddP/5'TCy3 DNA in mock reactions lacking poly(dT)<sub>70</sub>  
1332 (**Figure S14D**). In contrast, RPA-OBA-Cy5 rapidly and completely dissociated from the  
1333 ddP/5'TCy3 DNA at each concentration of poly(dT)<sub>70</sub> (**Figure S14D**) and the rates RPA-OBA-  
1334 Cy5 dissociation are dependent upon the concentration of poly(dT)<sub>70</sub> (**Figure S14E**), indicating a  
1335 second order, bimolecular reaction. Altogether, this indicates that human RPA complexes can  
1336 undergo concentration-dependent facilitated exchange between ssDNA sequences.

1337

## 1338 **Supplementary Methods**

1339 *Determining stoichiometry of RPA:ssDNA interactions via FRET.* The Cy3/Cy5-labeled ssDNA  
1340 oligonucleotide (poly(dT)<sub>30</sub>-FRET) accommodates one RPA heterotrimer and is shown in **Figure**  
1341 **S1**<sup>25</sup>. All experiments were performed at room temperature ( $23 \pm 2 \text{ }^\circ\text{C}$ ) in either 1X Mg<sup>2+</sup>/Ca<sup>2+</sup>  
1342 buffer and the ionic strength adjusted to 200 mM by addition of KCl or in 1X Mg<sup>2+</sup> buffer with  
1343 the ionic strength adjusted to 200 mM by addition of KOAc. The excitation and emission slit  
1344 widths were set to 5 nm. The poly(dT)<sub>30</sub>-FRET ssDNA is titrated with increasing concentrations  
1345 of RPA. For each RPA addition, fluorescence emission intensities ( $I_{665}$  and  $I_{563}$ ) are monitored  
1346 over time until both signals stabilize for at least 1 min. Within this stable region, E<sub>FRET</sub> values are  
1347 calculated from the observed fluorescence emission intensities ( $I_{665}$  and  $I_{563}$ ) and averaged to  
1348 obtain the final E<sub>FRET</sub> value for a given RPA addition. Under the experimental conditions, RPA  
1349 binding is stoichiometric and, hence, E<sub>FRET</sub> increases linearly until the ssDNA is saturated with  
1350 Cy5-labeled RPA (i.e., equivalence point)<sup>12,25</sup>. Data is plotted as a function of the ratio of the  
1351 concentrations of active RPA and DNA (i.e., [RPA]:[DNA]) and fit to two segment lines (a  
1352 linear regression with a positive slope and a flat line). The equivalence point (RPA per DNA) is  
1353 calculated from the intersection of the two segment lines.

1354 *Equilibrium FRET assays to characterize RPA interactions.* One or more of the following  
1355 components are pre-equilibrated in a fluorometer cell with 1 mM ATP; Cy3-labeled P/T DNA  
1356 (20 nM, **Figure S1**), NeutrAvidin (80 nM), and a Cy5-labeled RPA (25 nM heterotrimer, RPA-  
1357 OBA-Cy5 or Cy5-OBD-RPA). The cell is subsequently placed in the instrument, the respective  
1358 solution is excited at 514 nm, and fluorescence emission spectra (530 nm – 750 nm) are recorded  
1359 (1 spectra/25.9 ms) until the spectra stabilizes for at least 1 min. Spectra observed within this  
1360 stable period are averaged to obtain the final spectra for the respective condition.

1361

1362 *Equilibrium FRET assays to determine the concentration of active human Cy5-labeled RPA.* A  
1363 Cy3-labeled Bio-P/T DNA substrate (**Figure S1**) is titrated with increasing concentrations of a  
1364 human Cy5-labeled RPA. For each RPA addition, fluorescence emission intensities ( $I_{665}$  and  $I_{563}$ )  
1365 are monitored over time until both signals stabilize for at least 1 min. Within this stable region,  
1366 E<sub>FRET</sub> values are calculated from the observed fluorescence emission intensities ( $I_{665}$  and  $I_{563}$ ) and  
1367 averaged to obtain the final E<sub>FRET</sub> value for a given RPA addition. Under the experimental  
1368 conditions, RPA binding is stoichiometric and, hence, E<sub>FRET</sub> increases linearly until the ssDNA is  
1369 saturated with Cy5-labeled RPA (i.e., equivalence point)<sup>12,25</sup>. Data is fit to two segment lines (a  
1370 linear regression with a positive slope and a flat line) and the equivalence point is calculated  
1371 from the intersection of the two segment lines. The concentration of the active Cy5-labeled RPA

1372 (in  $\mu\text{M}$ ) is determined by dividing the amount of RPA-binding sites (in pmoles) by the total  
1373 volume (in  $\mu\text{L}$ ) of Cy5-labeled RPA at the equivalence point. Each Cy3-labeled P/T DNA  
1374 substrate utilized in the present study accommodates 1 RPA heterotrimer. Hence, for a given  
1375 Cy3-labeled P/T DNA, Cy5-labeled RPA FRET pair, the amounts of RPA-binding sites is equal  
1376 to the amount of the respective Cy3-labeled P/T DNA.

1377 *Pre-steady state FRET assays to monitor RPA-DNA interactions.* A solution containing a Cy3-  
1378 labeled P/T DNA (20 nM, **Figure S1**), NeutrAvidin (80 nM, Thermo Scientific), and ATP (1  
1379 mM, Thermo Scientific) is pre-incubated, and the resultant solution is transferred to a  
1380 fluorometer cell that is then placed in the instrument. Fluorescence emission intensities ( $I_{665}$  and  
1381  $I_{563}$ ) are monitored over time until both signals stabilize for at least 1 min. Within this stable  
1382 region,  $E_{\text{FRET}}$  values are calculated from the observed fluorescence emission intensities ( $I_{665}$  and  
1383  $I_{563}$ ) and averaged to obtain the  $E_{\text{FRET}}$  value observed prior to addition of Cy5-labeled RPA.  
1384 Then, a Cy5-labeled RPA (25 nM heterotrimer, either Cy5-OBDRPA or RPA-OBA-Cy5) is  
1385 added, the resultant solution is mixed by pipetting, and the fluorescence emission intensities ( $I_{665}$   
1386 and  $I_{563}$ ) are monitored over time, beginning 10 s after the addition of the Cy5-labeled RPA (i.e.,  
1387  $\Delta t \leq 10$  s). To determine the predicted  $E_{\text{FRET}}$  trace for a Cy5-labeled RPA remaining completely  
1388 disengaged from a Cy3-labeled P/T DNA, these experiments are repeated with Cy5-labeled RPA  
1389 alone and with a Cy3-labeled P/T DNA alone and the  $E_{\text{FRET}}$  is calculated for each time point by

1390 the equation 
$$E_{\text{FRET}} = \frac{(I_{665}^{\text{RPA}} + I_{665}^{\text{DNA}})}{(I_{665}^{\text{RPA}} + I_{665}^{\text{DNA}}) + (I_{563}^{\text{RPA}} + I_{563}^{\text{DNA}})}$$

1391 *Equilibrium FRET assays to determine the stoichiometry of RFC-catalyzed loading of PCNA*  
1392 *onto P/T junctions.* A Cy3-labeled P/T DNA (55 nM of either 5'Cy3P/T or 3'Cy3P/T pre-bound  
1393 with 220 nM NeutrAvidin) is saturated with RPA prior to the addition of RFC (55 nM) and then  
1394 Cy5-PCNA is titrated in. After each addition of Cy5-PCNA,  $E_{\text{FRET}}$  is monitored over time until  
1395 the signal stabilizes for at least 1 min.  $E_{\text{FRET}}$  values observed within this stable period are  
1396 averaged to obtain the  $E_{\text{FRET}}$  value observed for the respective addition of Cy5-PCNA.

1397  
1398 *Pre-steady state FRET assays to monitor PCNA unloading.* A solution containing a 5'ddPCy3/T  
1399 DNA (20 nM, **Figure S1**), NeutrAvidin (80 nM), and ATP (1 mM) is pre-incubated with RPA  
1400 (25 nM heterotrimer). Then, Cy5-PCNA (20 nM homotrimer) is added, the resultant solution is  
1401 transferred to a fluorometer cell, and the cell is placed in the instrument.  $E_{\text{FRET}}$  is monitored over  
1402 time until the signal stabilizes for at least 1 min.  $E_{\text{FRET}}$  values observed within this stable period  
1403 are averaged to obtain the  $E_{\text{FRET}}$  value observed prior to addition of RFC•ATP. Next, a pre-  
1404 formed RFC•ATP complex (20 nM RFC heteropentamer, 1 mM ATP) is added, the resultant  
1405 solution is mixed via pipetting, and  $E_{\text{FRET}}$  is monitored beginning  $\leq 10$  s after the addition of  
1406 RFC (i.e.,  $\Delta t \leq 10$  s) and continues until the signal stabilizes for at least 1 min.  $E_{\text{FRET}}$  values  
1407 observed within this stable period are averaged to obtain the  $E_{\text{FRET}}$  value observed prior to  
1408 addition of unlabeled PCNA. Finally, unlabeled PCNA (1.4  $\mu\text{M}$  homotrimer) is added, the  
1409 resultant solution is mixed by pipetting, and  $E_{\text{FRET}}$  is monitored beginning  $\leq 10$  s after the  
1410 addition of unlabeled PCNA ( $\Delta t \leq 10$  s).

1411  
1412 *Pre-steady state FRET assays to monitor facilitated exchange of RPA between ssDNA sequences.*  
1413 A solution containing ddP/5'TCy3 (50 nM, **Figure S1**), NeutrAvidin (200 nM, Thermo

1414 Scientific), and ATP (1 mM, Thermo Scientific), and RPA-OBA-Cy5 (55 nM heterotrimer) is  
1415 pre-incubated, and the resultant solution is transferred to a fluorometer cell that is then placed in  
1416 the instrument. Fluorescence emission intensities ( $I_{665}$  and  $I_{563}$ ) are monitored over time until  
1417 both signals stabilize for at least 1 min. Within this stable region,  $E_{\text{FRET}}$  values are calculated  
1418 from the observed fluorescence emission intensities ( $I_{665}$  and  $I_{563}$ ) and averaged to obtain the  
1419  $E_{\text{FRET}}$  value observed prior to addition of poly(dT)<sub>70</sub>. Then, poly(dT)<sub>70</sub> (0.0 – 2.25  $\mu\text{M}$ ) is added,  
1420 the resultant solution is mixed by pipetting, and the fluorescence emission intensities ( $I_{665}$  and  
1421  $I_{563}$ ) are monitored over time, beginning 10 s after the addition of the poly (dT)<sub>70</sub> (i.e.,  $\Delta t \leq 10$  s).

1422

1423

1424

1425

1426

1427

1428

1429

1430

1431 **Supplemental Figures**

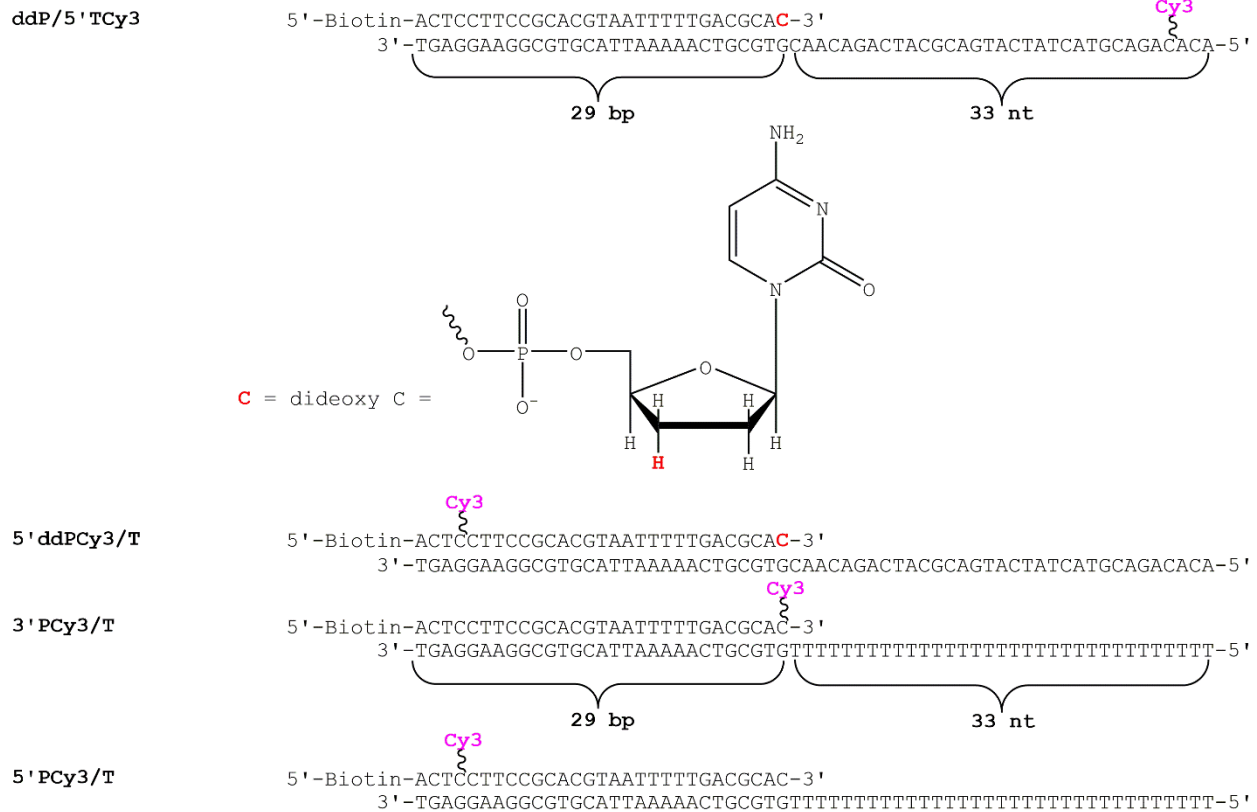

1432 **Figure S1.** DNA substrates utilized in this study. For substrates containing dsDNA regions, the  
1433 sequences and lengths (29 bp) of these regions are all identical. When annealed, each substrate  
1434 mimics a nascent P/T junction. The size of the dsDNA P/T region (29 bp) is in agreement with  
1435 the requirements for assembly of a PCNA ring onto DNA by RFC<sup>2,3,18</sup>. The ssDNA regions  
1436 adjacent to the 3' end of the P/T junctions are 33 nt in length and accommodate one RPA  
1437 heterotrimer<sup>4-6</sup>. RPA prevents loaded PCNA from sliding off the ssDNA end of the substrate<sup>2</sup>.  
1438 When pre-bound to NeutrAvidin, the biotin attached to the 5'-end of a primer strand prevents  
1439 loaded PCNA from sliding off the dsDNA end of the substrate. ssDNA comprised only of T (i.e.,  
1440 poly(dT)<sub>x</sub>) is incapable of adapting stable secondary structures<sup>26</sup>. Primers terminated at the 3'  
1441 end with a dideoxy C nucleotide cannot be extended by Pol δ.

1442  
1443  
1444  
1445  
1446  
1447  
1448  
1449  
1450  
1451  
1452

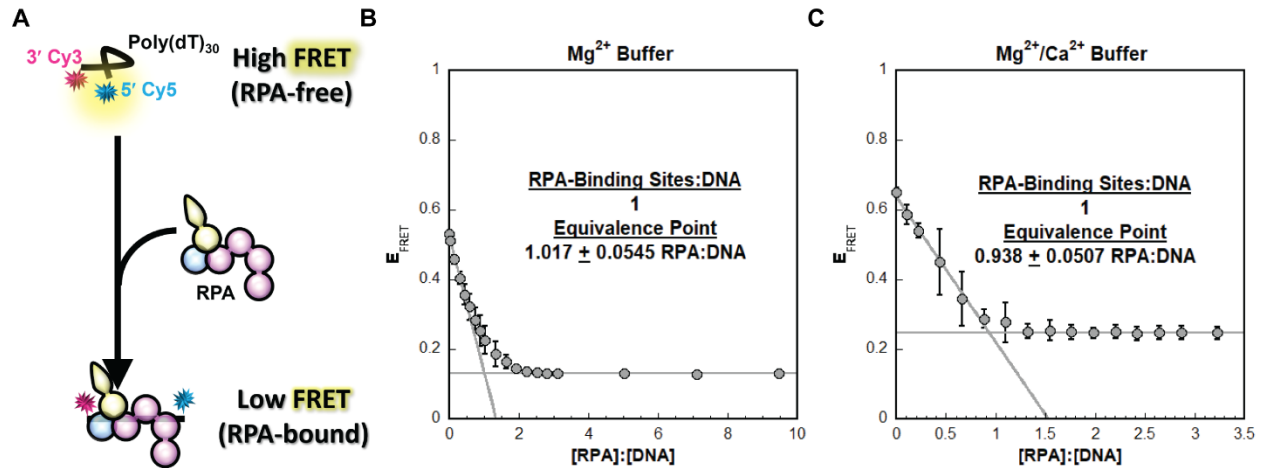

1453 **Figure S2.** Effect of experimental reaction buffers on RPA binding ssDNA. (A) Schematic  
1454 representation of the FRET experiment utilizing poly(dT)<sub>30</sub> FRET ssDNA and native RPA.  
1455 Poly(dT)<sub>30</sub> FRET is terminally labeled with a 3' Cy3 (FRET donor) and a 5' Cy5 (FRET  
1456 acceptor). In the absence of RPA, free DNA (poly(dT)<sub>30</sub>-FRET) forms a compact, flexible  
1457 structure, bringing the two cyanine fluorophores close together and yielding a high E<sub>FRET</sub>.  
1458 Binding of an RPA stretches the engaged ssDNA and increases its bending 2 – 3 fold<sup>12,27</sup>,  
1459 thereby increasing the Cy3, Cy5 distance and reducing E<sub>FRET</sub>. (B - C) FRET data for RPA  
1460 titrations carried out in Mg<sup>2+</sup> Buffer (panel B) and Mg<sup>2+</sup>/Ca<sup>2+</sup> Buffer (panel C). For each,  
1461 poly(dT)<sub>30</sub>-FRET (10 nM) is titrated with RPA and E<sub>FRET</sub> is monitored. The observed E<sub>FRET</sub> is  
1462 plotted as a function of the ratio of concentrations of active RPA and DNA (i.e., [RPA]:[DNA]).  
1463 Each data point represents the mean ± S.E.M. of at least three independent measurements. The  
1464 equivalence points for each panel are indicated with standard errors of the calculations.

1465  
1466  
1467  
1468  
1469  
1470  
1471  
1472  
1473  
1474  
1475  
1476  
1477  
1478  
1479  
1480  
1481  
1482  
1483  
1484



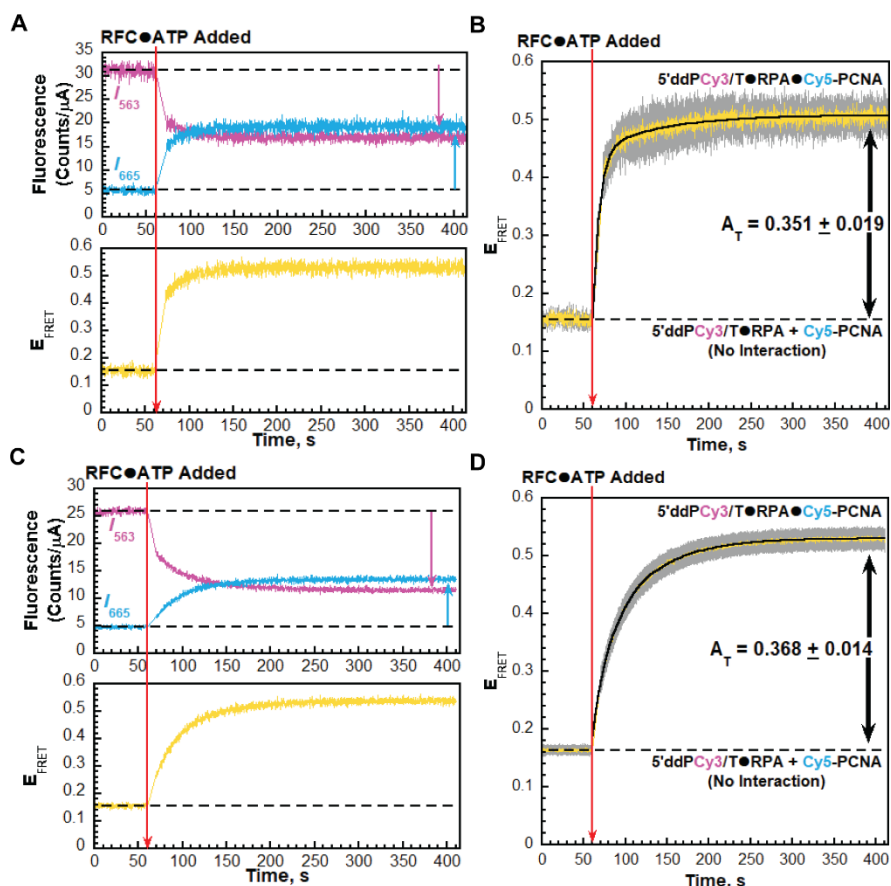

1485 **Figure S3.** Effect of experimental reaction buffers on RFC-catalyzed loading of PCNA onto P/T  
 1486 junctions. Experiments are carried out on the 5'ddPcy3/T DNA substrate and the results are  
 1487 plotted and analyzed exactly as described in **Figure 3A – C** in the main text. (**A - B**). Data  
 1488 observed with native RPA in  $Mg^{2+}$  buffer. (**C – D**) Data observed with native RPA in  $Ca^{2+}/Mg^{2+}$   
 1489 buffer. Data is from **Figure 3B – C** in the main text. For  $E_{FRET}$  traces in panels **B** and **D**, each is  
 1490 the mean of at least three independent traces with the S.E.M. shown in grey.  $E_{FRET}$  traces  
 1491 observed after the addition of RFC are each fit to double exponential rises and the  $A_T$  are  
 1492 reported in the respective graph as well as in **Table S1** along with other kinetic variables.

1493  
1494  
1495  
1496  
1497  
1498  
1499  
1500  
1501  
1502  
1503  
1504  
1505  
1506

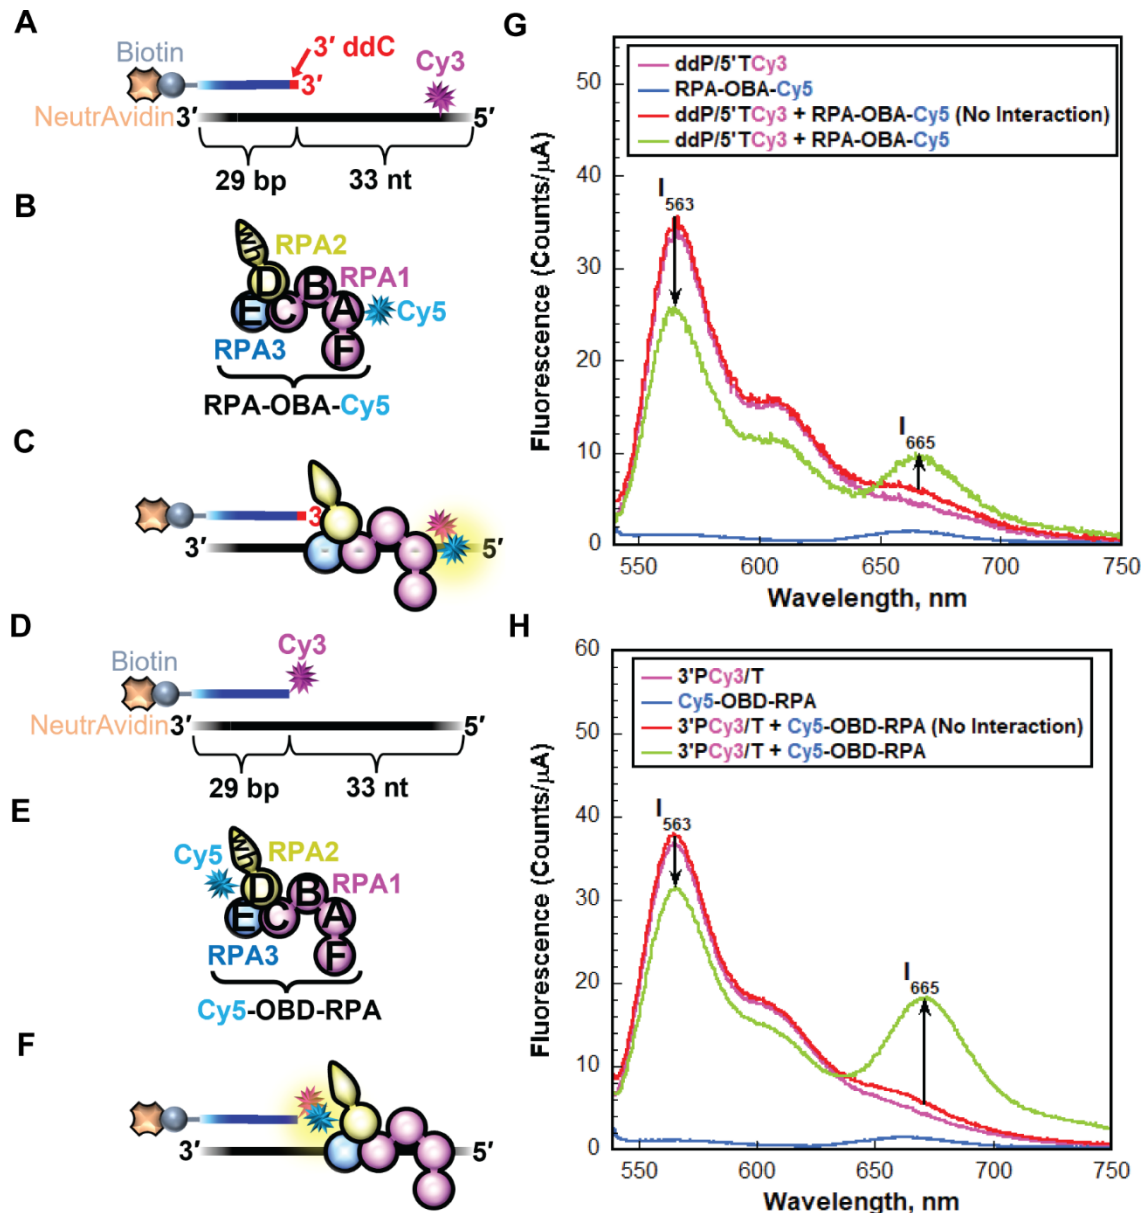

1507 **Figure S4** Monitoring interaction between RPA and a P/T junction by FRET. (A - C) Schematic  
 1508 representations of the Cy3-labeled P/T DNA substrate (panel A, ddP/5'TCy3, **Figure S1**) and  
 1509 Cy5-labeled RPA (panel B, RPA-OBA-Cy5) utilized to monitor the interaction of RPA OBA  
 1510 with a P/T junction (panel C). (D - F) Schematic representations of the Cy3-labeled P/T DNA  
 1511 substrate (panel D, 3'PCy3/T, **Figure S1**) and Cy5-labeled RPA (Cy5-OBD-RPA) utilized to  
 1512 monitor the interaction of OBD with a P/T junction (panel F). RPA subunits are color-coded and  
 1513 depicted as in **Figure 1**. (G - H) Fluorescence emission spectra of RPA-P/T DNA interactions.  
 1514  $I_{665}$  and  $I_{563}$  are denoted in each spectrum. FRET is indicated by an increase in  $I_{665}$  and a  
 1515 concomitant decrease in  $I_{563}$ , both of which are denoted in each panel by black arrows. For each  
 1516 panel, the predicted spectrum for no interaction between the respective Cy5-labeled RPA and the  
 1517 corresponding Cy3-labeled P/T DNA is determined by adding the spectrums of the individual  
 1518 components. The spectrums obtained for the interactions between RPA-OBA-Cy5 and the  
 1519 ddP/5'TCy3 DNA substrate and between Cy5-OBD-RPA and the 3'PCy3/T DNA substrate are  
 1520 shown in panels G and H, respectively.

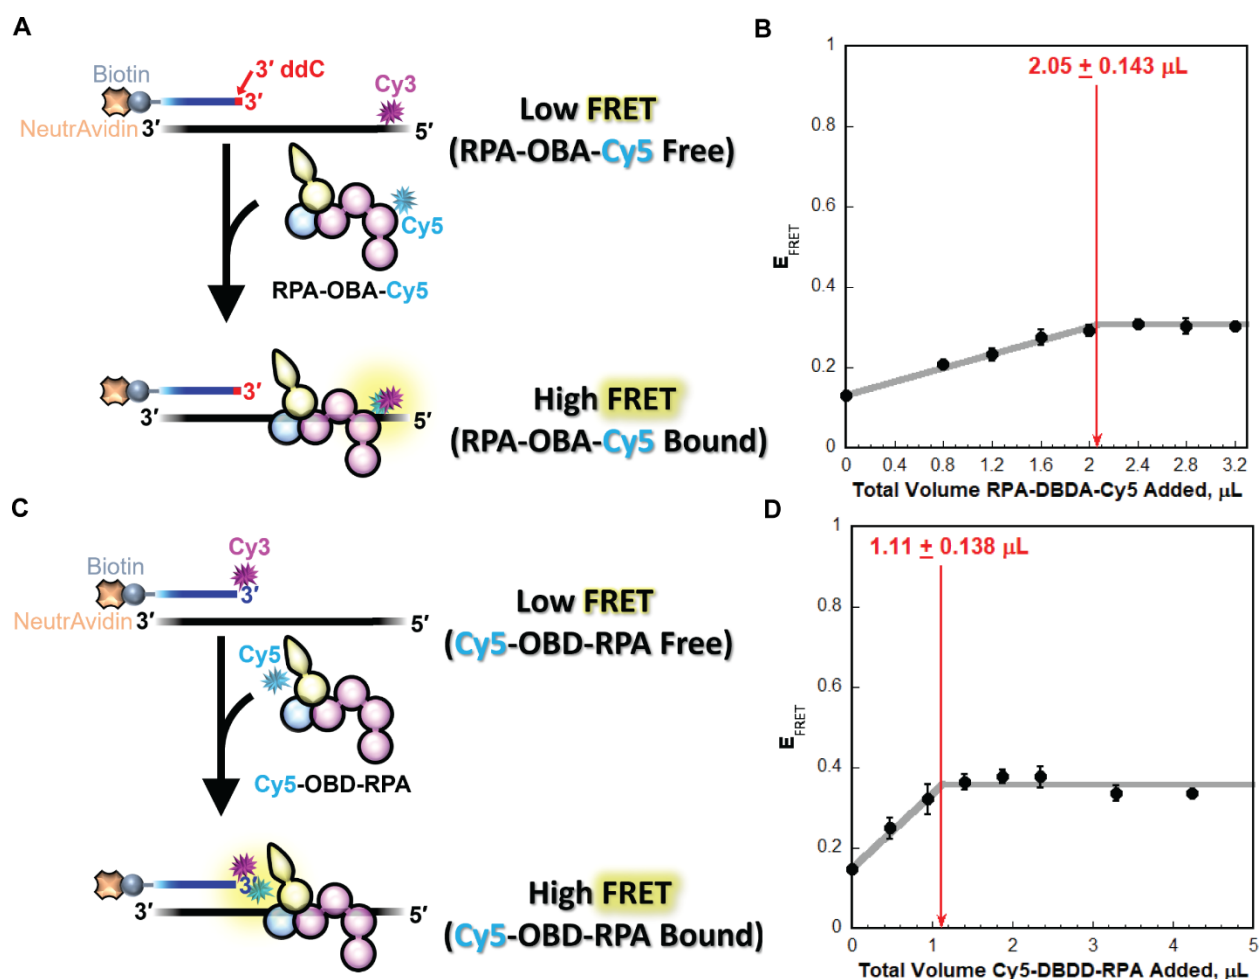

1521 **Figure S5.** Concentration of active Cy5-labeled RPA. (A) Schematic representation of FRET-  
 1522 based active site titration of RPA-OBA-Cy5. (B) Titration of ddP/5'Cy3T DNA (3.014 pmole,  
 1523 3.014 pmole RPA binding sites) with RPA-OBA-Cy5. Each data point represents the mean  $\pm$   
 1524 S.E.M. of at least three independent measurements. The equivalence point is indicated with  
 1525 standard error of the calculation. Saturation is reached at approximately 2.05  $\mu\text{L}$  total RPA-  
 1526 OBA-Cy5 added, yielding a concentration of 1.47  $\mu\text{M}$  (3.014 pmole RPA binding sites/2.05  $\mu\text{L}$   
 1527 total RPA-OBA-Cy5 added = 1.47 pmole/ $\mu\text{L}$  = 1.47  $\mu\text{M}$ ). (C) Schematic representation of  
 1528 FRET-based active site titration of Cy5-OBD-RPA. The assay is carried out as described in  
 1529 panel A except that the FRET donor is 3'PCy3/T DNA (**Figure S1**) and the FRET acceptor is  
 1530 Cy5-OBD-RPA. (D) Titration of 3'PCy3/T DNA (2.43 pmole, 2.43 pmole RPA binding sites)  
 1531 with Cy5-OBD-RPA. Each data point represents the mean  $\pm$  S.E.M. of at least three independent  
 1532 measurements. The equivalence point is indicated with standard error of the calculation.  
 1533 Saturation is reached at approximately 1.11  $\mu\text{L}$  total Cy5-OBD-RPA, yielding a concentration of  
 1534 2.19  $\mu\text{M}$  (2.43 pmole RPA binding sites/1.11  $\mu\text{L}$  total Cy5-OBD-RPA added = 2.19 pmole/ $\mu\text{L}$  =  
 1535 2.19  $\mu\text{M}$ ).

1536

1537

1538

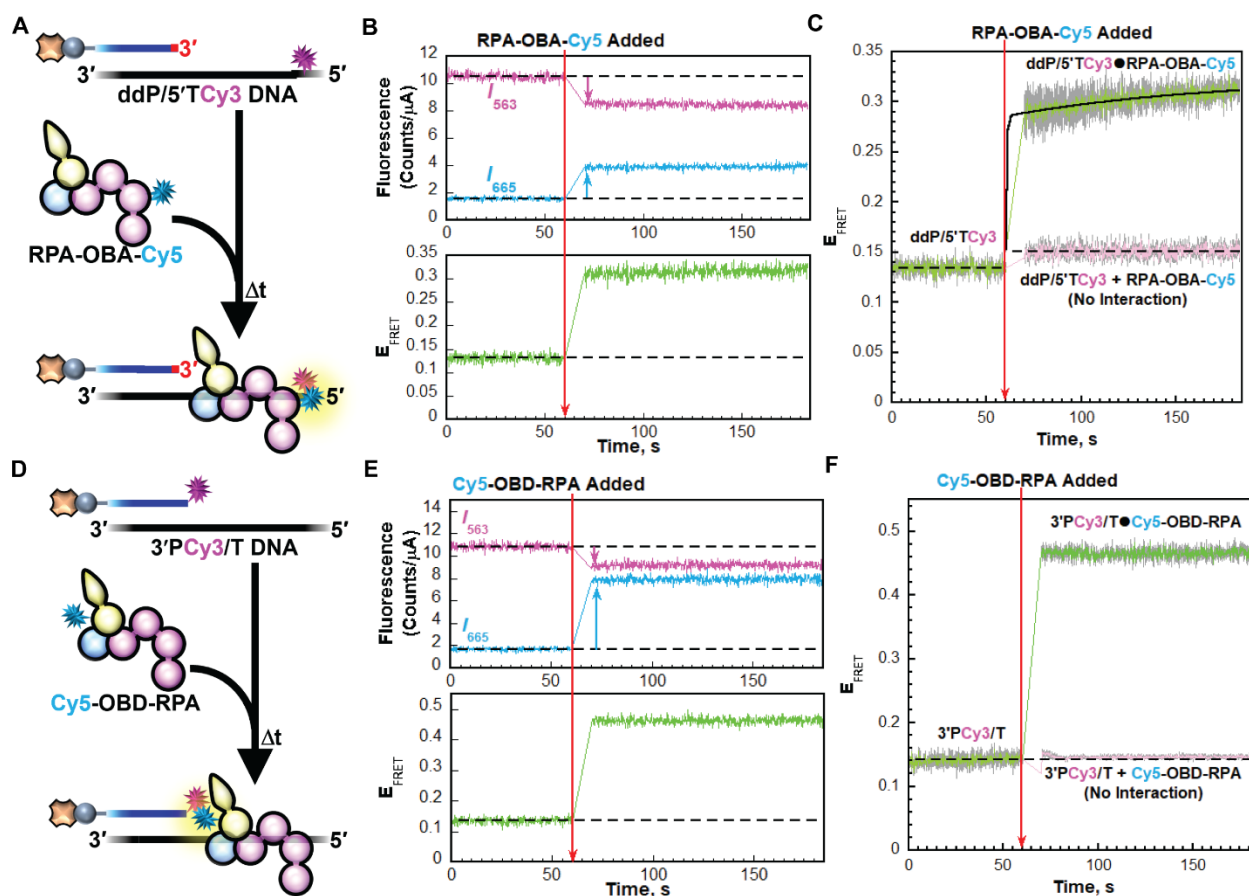

1539 **Figure S6.** RPA engaging a P/T junction. **(A)** Schematic representation of the FRET experiment  
 1540 performed with ddP/5'TCy3 DNA (+ NeutrAvidin) and RPA-OBA-Cy5 **(B)** Sample time  
 1541 trajectories of  $I_{563}$  and  $I_{665}$  (Top) and their  $E_{\text{FRET}}$  (Bottom). The time at which RPA-OBA-Cy5 is  
 1542 added is indicated by a red arrow. For observation, the  $I_{563}$ ,  $I_{665}$ , and  $E_{\text{FRET}}$  values observed prior to  
 1543 the addition of RPA-OBA-Cy5 are fit to flat lines that are extrapolated to the axis limits.  
 1544 Changes in  $I_{563}$  and  $I_{665}$  are indicated by magenta and cyan arrows, respectively. **(C)** FRET data.  
 1545 Each  $E_{\text{FRET}}$  trace is the mean of at least three independent traces with the S.E.M. shown in grey.  
 1546 The time at which RPA-OBA-Cy5 is added is indicated by a red arrow. The  $E_{\text{FRET}}$  trace observed  
 1547 prior to the addition of RPA-OBA-Cy5 is fit to a flat line. The  $E_{\text{FRET}}$  observed after the addition  
 1548 of RPA-OBA-Cy5 is fit to a double exponential rise and the observed rate constant for the  
 1549 second, slower phase ( $k_{\text{obs inc},2}$ ) is reported in the graph. The predicted FRET trace (pink) for no  
 1550 interaction between RPA-OBA-Cy5 and the 5'TCy3 DNA is fit to a flat line. **(D – F)**  
 1551 Experiments, results, and data analysis carried out for 3'PCy3/T DNA and Cy5-OBD-RPA  
 1552 exactly as described in panels A – C except FRET traces observed after the addition of Cy5-  
 1553 OBD-RPA were not fit to a kinetic model.

1554  
 1555  
 1556  
 1557  
 1558  
 1559

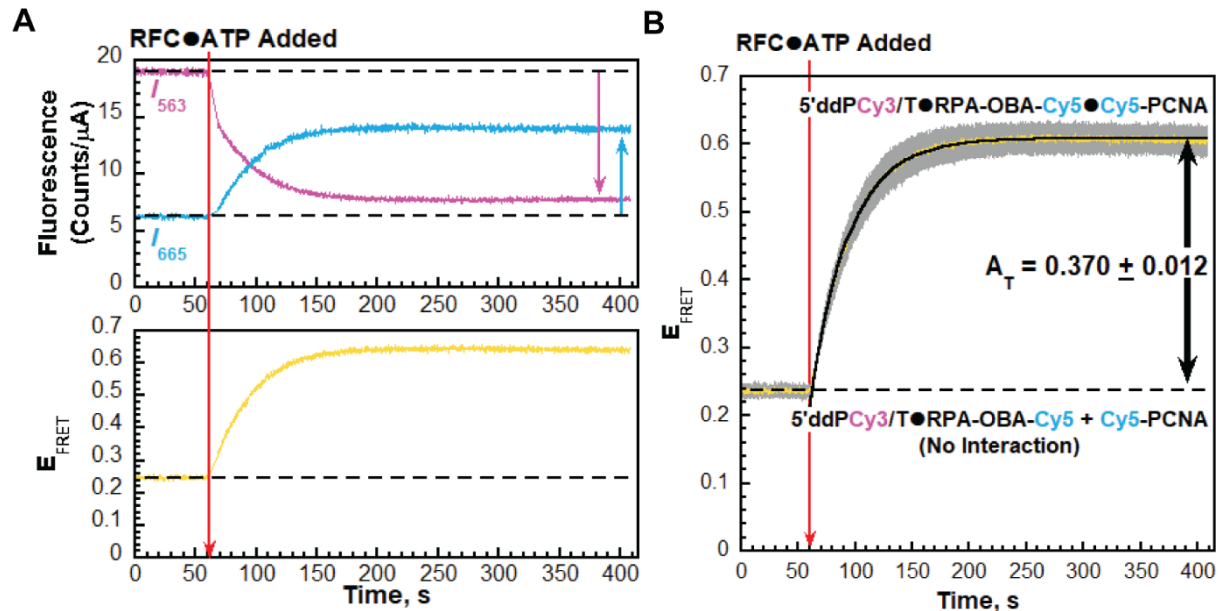

1560 **Figure S7.** Effect of Cy5 labeling of RPA OBA on RFC-catalyzed loading of PCNA onto P/T  
1561 junctions. Experiments are carried out with RPA-OBA-Cy5 on the 5'ddPCy3/T DNA substrate  
1562 and the results are plotted and analyzed exactly as described in **Figure 3A – C** in the main text.  
1563  $E_{\text{FRET}}$  trace in panel **B** is the mean of at least three independent traces with the S.E.M. shown in  
1564 grey.  $E_{\text{FRET}}$  trace in panel **B** observed after the addition of RFC is fit to an exponential rise and  
1565 the  $A_T$  is reported in the graph as well as in **Table S1** along with other kinetic variables. The  
1566 total amplitude observed on the 5'ddPCy3/T DNA substrate in  $\text{Mg}^{2+}/\text{Ca}^{2+}$  buffer with RPA-  
1567 OBA-Cy5 ( $A_T = 0.370 \pm 0.012$ ) is within experimental error of that observed under the same  
1568 experimental conditions with native RPA ( $A_T = 0.368 \pm 0.014$ , **Figure 3C**, **Figure S3D**, **Table**  
1569 **S1**). This indicates that RPA-OBA-Cy5 fully supports RFC-catalyzed loading of PCNA onto P/T  
1570 junctions.

1571  
1572  
1573  
1574  
1575  
1576  
1577  
1578  
1579  
1580  
1581  
1582  
1583  
1584  
1585  
1586  
1587  
1588

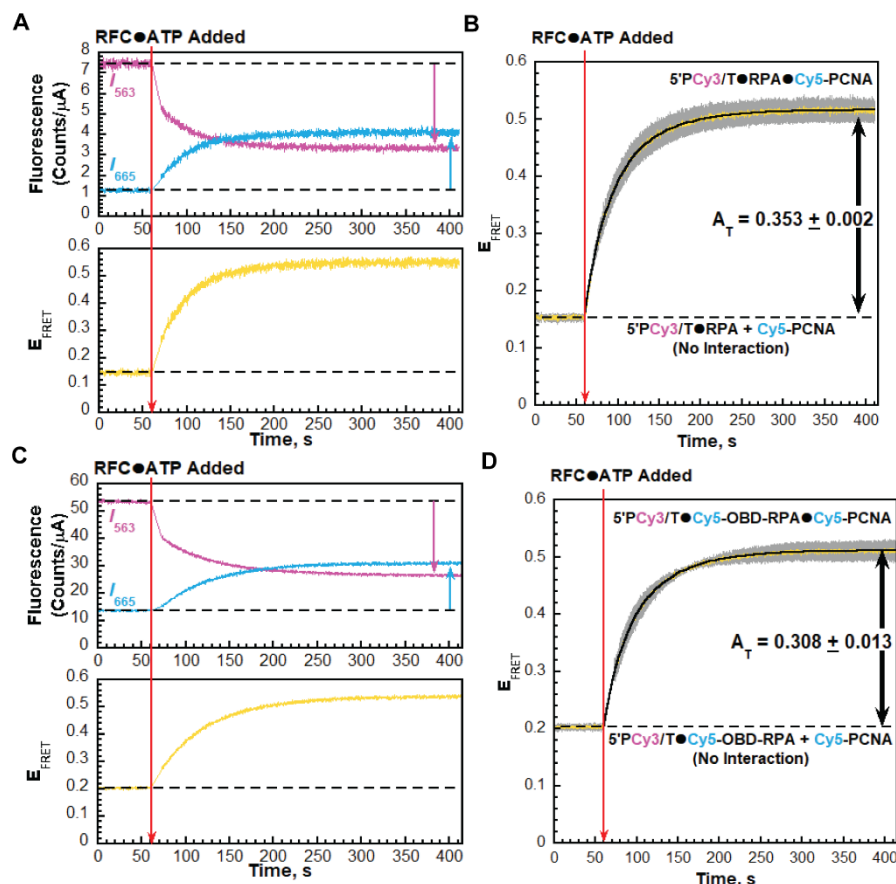

1589 **Figure S8.** Effect of Cy5 label on OBD of RPA on RFC-catalyzed loading of PCNA onto P/T  
 1590 junctions. Experiments are carried out on the 5'PCy3/T DNA substrate and the results are plotted  
 1591 and analyzed exactly as described in **Figure 5A – C** in the main text. (**A – B**) Data observed with  
 1592 native RPA in  $\text{Ca}^{2+}/\text{Mg}^{2+}$  buffer (from **Figure 5B – C** in the main text). (**C – D**) Data observed  
 1593 with Cy5-OBD-RPA in  $\text{Ca}^{2+}/\text{Mg}^{2+}$  buffer. For  $E_{\text{FRET}}$  traces in panels **B** and **D**, each is the mean  
 1594 of at least three independent traces with the S.E.M. shown in grey.  $E_{\text{FRET}}$  traces observed after  
 1595 the addition of RFC are each fit to double exponential rises and the total amplitudes ( $A_T$ ) are  
 1596 reported in the respective graph as well as in **Table S1** (along with other kinetic variables).  
 1597 The total amplitude observed with Cy5-OBD-RPA ( $A_T = 0.308 \pm 0.013$ ) agrees very well with  
 1598 that observed under the same experimental conditions with native RPA ( $A_T = 0.353 \pm 0.002$ ,  
 1599 **Figure 5C, Table S1**). Furthermore, the rate constants [ $k_{\text{obs inc},1} = 5.06 \pm 0.18 (x 10^{-2}) \text{ s}^{-1}$ ,  $k_{\text{obs inc},2}$   
 1600  $= 1.83 \pm 0.02 (x 10^{-2}) \text{ s}^{-1}$ , **Table S1**] observed with Cy5-OBD-RPA are nearly identical to those  
 1601 observed under the same experimental conditions with native RPA [ $k_{\text{obs inc},1} = 4.34 \pm 0.18 (x 10^{-2})$   
 1602  $\text{ s}^{-1}$ ,  $k_{\text{obs inc},2} = 1.79 \pm 0.04 (x 10^{-2}) \text{ s}^{-1}$ , **Table S1**]. Together, this indicates that RPA-OBA-Cy5  
 1603 fully supports RFC-catalyzed loading of PCNA onto P/T junctions.

1604  
 1605  
 1606  
 1607  
 1608  
 1609  
 1610  
 1611

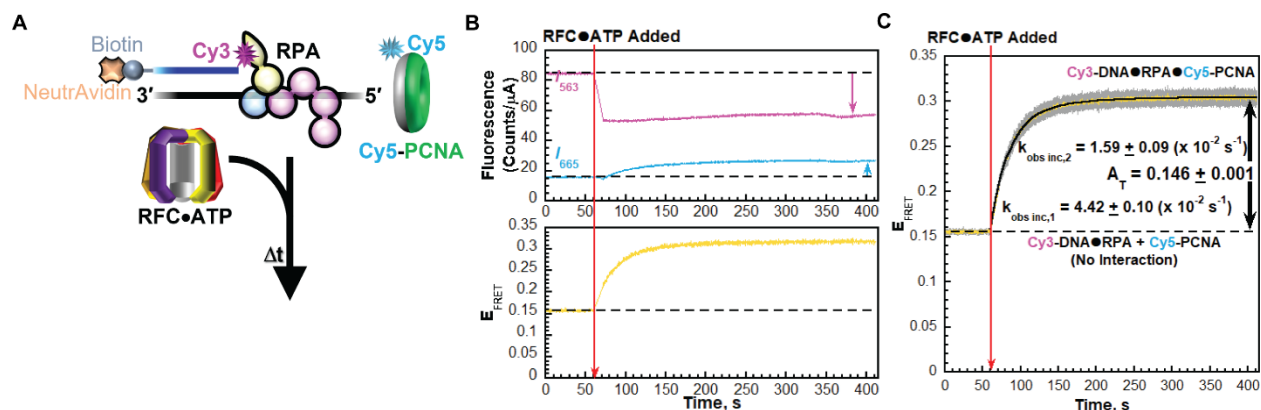

1612 **Figure S9.** Effects of primer Cy3 donor location on the kinetics RFC-catalyzed loading of  
 1613 PCNA onto P/T junctions. (A) Schematic representation of the FRET experiment. Reactions  
 1614 were carried out exactly as described in 5A in the main text except with 3'Cy3P/T DNA. Note  
 1615 the Cy5 label on PCNA will be oriented away from the Cy3 donor on the 3' terminus of the  
 1616 primer strand when Cy5-PCNA is loaded onto the 3'Cy3P/T DNA substrate by RFC (B) Sample  
 1617 time trajectories of  $I_{563}$  and  $I_{665}$  (Top) and their  $E_{\text{FRET}}$  (Bottom). The time at which the RFC•ATP  
 1618 complex is added is indicated by a red arrow. Changes in  $I_{563}$  and  $I_{665}$  are indicated by magenta  
 1619 and cyan arrows, respectively. For observation, the  $I_{563}$ ,  $I_{665}$ , and  $E_{\text{FRET}}$  values observed prior to  
 1620 the addition of the RFC•ATP complex are fit to flat lines that are extrapolated to the axis limits.  
 1621 (C) FRET data. Each  $E_{\text{FRET}}$  trace is the mean of at least three independent traces with the S.E.M.  
 1622 shown in grey. The time at which the RFC•ATP is added is indicated by a red arrow. The  $E_{\text{FRET}}$   
 1623 trace observed prior to the addition of the RFC•ATP complex represents the complete absence of  
 1624 interactions between the 3'PCy3/T•RPA complex and Cy5-PCNA and is fit to a flat line that is  
 1625 extrapolated to the axis limits. The  $E_{\text{FRET}}$  trace observed after the addition of the RFC•ATP  
 1626 complex is fit to a double exponential rise and the observed rate constants ( $k_{\text{obs inc,1}}$  and  $k_{\text{obs inc,2}}$ )  
 1627 and  $A_T$  are reported in the graph as well as in Table S1. The predicted  $E_{\text{FRET}}$  trace (pink) for no  
 1628 interaction between 5P'Cy3/T•RPA complex and the loading complex is fit to a flat line.

1629  
 1630  
 1631  
 1632  
 1633  
 1634  
 1635  
 1636  
 1637  
 1638  
 1639  
 1640  
 1641  
 1642  
 1643  
 1644  
 1645

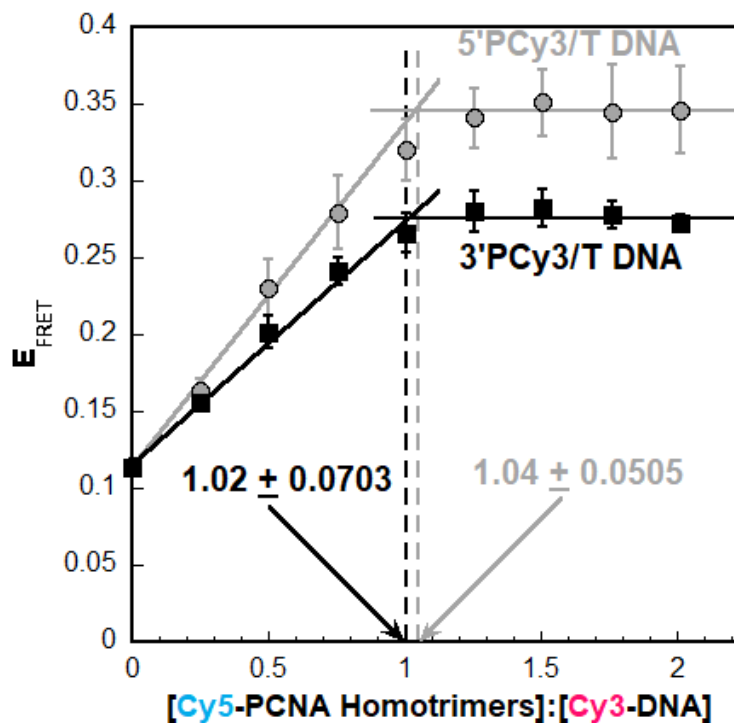

1646 **Figure S10.** Titrations of the steady state FRET signal. Results are plotted as a function of the  
1647  $[\text{Cy5-PCNA homotrimer}]:[\text{Cy3-DNA}]$  ratio and each data point represents the mean  $\pm$  S.E.M. of  
1648 at least three independent measurements. Data observed for the 5'PCy3/T and 3'PCy3/T DNA  
1649 substrates is shown in grey and black, respectively. Under the experimental conditions, RFC-  
1650 catalyzed loading of PCNA onto the 5'PCy3/T is stoichiometric (**Figure S9**) and, hence, FRET  
1651 increases linearly until the DNA is saturated with PCNA (i.e., the equivalence point)<sup>2,3</sup> at a ratio  
1652 of 1 PCNA homotrimer:1 P/T DNA. Data is fit to two segment lines (a linear regression with a  
1653 positive slope and a flat line) and the equivalence points (indicated with standard errors of the  
1654 calculations) are calculated from the intersection of the two segment lines. Equivalence points  
1655 for each P/T DNA substrate are indicated on the graph.

1656  
1657  
1658  
1659  
1660  
1661  
1662  
1663  
1664  
1665  
1666  
1667  
1668  
1669  
1670  
1671



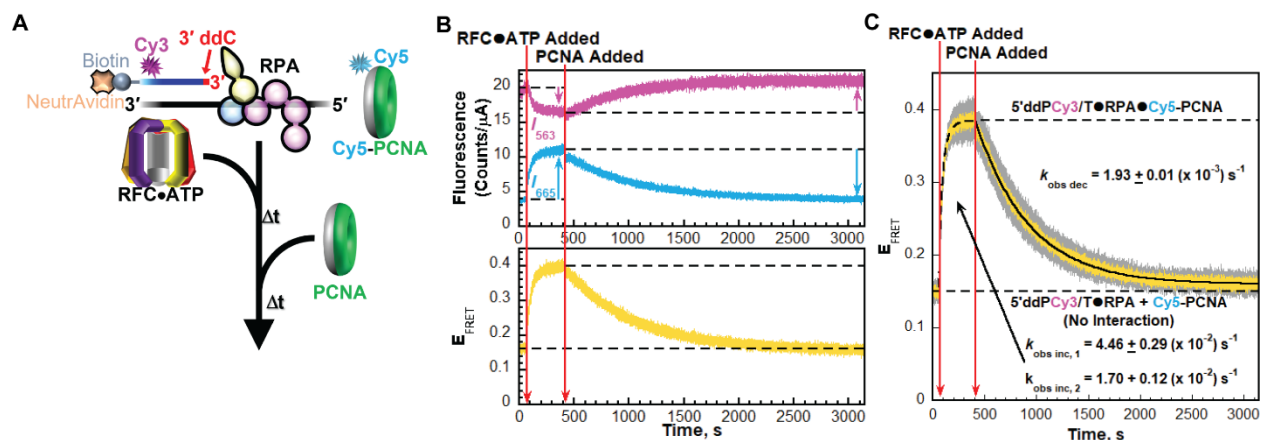

1672 **Figure S11.** Dynamics of PCNA encircling a P/T junction. (A) Schematic representation of the  
 1673 FRET experiment performed with 5'ddPCy3/T DNA, RPA, Cy5-PCNA, RFC, ATP, and PCNA.  
 1674 (B) Sample time trajectories of  $I_{563}$  and  $I_{665}$  (Top) and their  $E_{FRET}$  (Bottom). The times at which  
 1675 the RFC•ATP complex and unlabeled PCNA are added are indicated by red arrows. For  
 1676 observation, the emission intensity traces and  $E_{FRET}$  values observed in the absence of RFC are  
 1677 each fit to dashed flat lines that are extrapolated. Also, dashed flat lines are drawn to highlight  
 1678 the  $I$  values and  $E_{FRET}$  values observed at equilibrium after the addition of unlabeled PCNA.  
 1679 Changes in  $I_{563}$  and  $I_{665}$  observed after each addition are indicated by magenta and cyan arrows,  
 1680 respectively. (C) FRET data. Each  $E_{FRET}$  trace is the mean of at least three independent traces  
 1681 with the S.E.M. shown in grey. The times at which RFC•ATP and unlabeled PCNA are added  
 1682 are indicated by red arrows. The  $E_{FRET}$  trace observed prior to the addition of the RFC•ATP  
 1683 complex is fit to a dashed flat line that is extrapolated to the axis limits to depict the average  
 1684  $E_{FRET}$  value for no interaction between Cy5-PCNA and the 5'ddPCy3/T•RPA complex. The  
 1685  $E_{FRET}$  trace observed after the addition of the RFC•ATP complex is fit to a dashed double  
 1686 exponential rise that is extrapolated to the axis limits to depict the average  $E_{FRET}$  value for  
 1687 complete loading of Cy5-PCNA onto the Cy3-labeled P/T DNA substrate (i.e., the  
 1688 5'ddPCy3/T•RPA•Cy5-PCNA complex). The rate constants observed for the  $E_{FRET}$  increase ( $k_{obs\ inc, 1}$   
 1689 and  $k_{obs\ inc, 2}$ ) are reported in the figure. The  $E_{FRET}$  trace observed after the addition of  
 1690 unlabeled PCNA is fit to a single exponential decay and the observed rate constant ( $k_{obs\ dec}$ )  
 1691 is reported in the graph.

1692  
1693  
1694  
1695  
1696  
1697  
1698  
1699  
1700  
1701  
1702  
1703  
1704

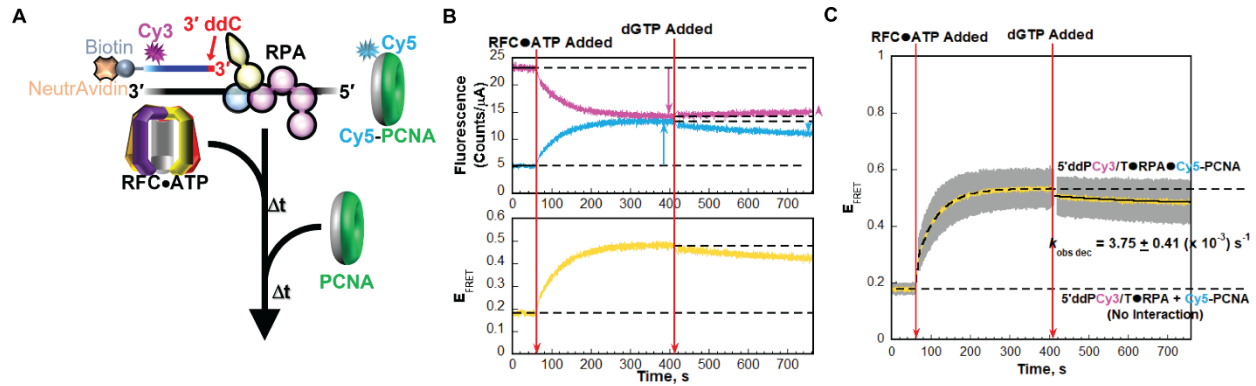

1705 **Figure S12.** Effects of added dGTP on the dynamics of PCNA encircling a P/T junction. (A)  
 1706 Schematic representation of the FRET experiment performed with 5'ddPCy3/T DNA, RPA, Cy5-  
 1707 PCNA, RFC, ATP, and dGTP. (B) Sample time trajectories of  $I_{563}$  and  $I_{665}$  (Top) and their  $E_{FRET}$   
 1708 (*Bottom*). The times at which the RFC•ATP complex and dGTP are added are indicated by red  
 1709 arrows. For observation, the emission intensity traces and  $E_{FRET}$  values observed in the absence  
 1710 of RFC are each fit to dashed flat lines that are extrapolated. Also, dashed flat lines are drawn to  
 1711 highlight the  $I$  values and  $E_{FRET}$  values observed at equilibrium after the addition of RFC•ATP.  
 1712 Changes in  $I_{563}$  and  $I_{665}$  observed after each addition are indicated by magenta and cyan  
 1713 arrows, respectively. (C) FRET data. Each  $E_{FRET}$  trace is the mean of at least three independent  
 1714 traces with the S.E.M. shown in grey. The times at which RFC•ATP and dGTP are added are indicated  
 1715 by red arrows. The  $E_{FRET}$  trace observed prior to the addition of the RFC•ATP complex is fit to a  
 1716 dashed flat line that is extrapolated to the axis limits to depict the average  $E_{FRET}$  value for no  
 1717 interaction between Cy5-PCNA and the 5'ddPCy3/T•RPA complex. The  $E_{FRET}$  trace observed  
 1718 after the addition of the RFC•ATP complex is fit to a dashed double exponential rise that is  
 1719 extrapolated to the axis limits to depict the average  $E_{FRET}$  value for complete loading of Cy5-  
 1720 PCNA onto the Cy3-labeled P/T DNA substrate (i.e., the 5'ddPCy3/T•RPA•Cy5-PCNA  
 1721 complex). The  $E_{FRET}$  trace observed after the addition of dGTP is fit to a single exponential  
 1722 decay and the observed rate constant ( $k_{obs\ dec}$ ) is reported in the graph.

1723  
 1724  
 1725  
 1726  
 1727  
 1728

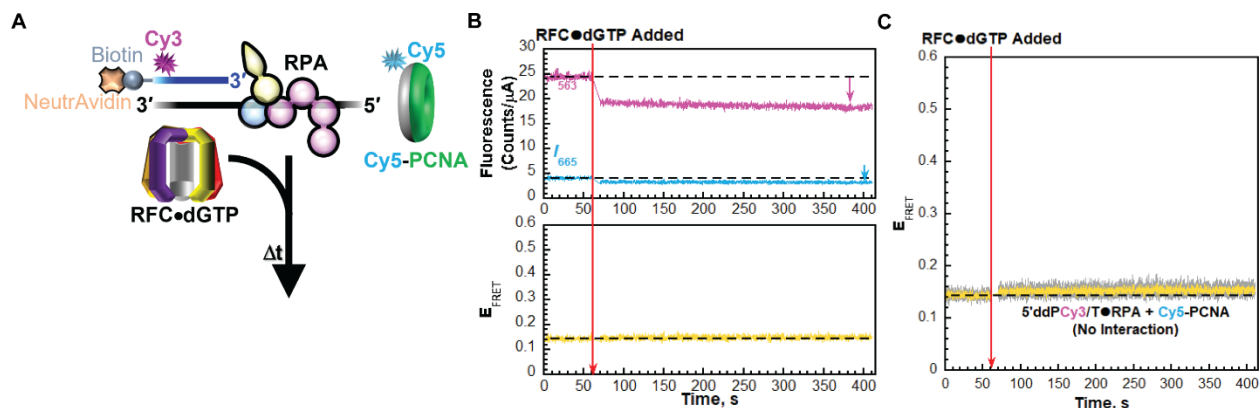

1729 **Figure S13.** Effects of dGTP on RFC-catalyzed loading of PCNA onto a P/T junction. (A)  
 1730 Schematic representation of the FRET experiment performed with 5' ddPCy3/T DNA, RPA, Cy5-  
 1731 PCNA, RFC, and dGTP. (B) Sample time trajectories of  $I_{563}$  and  $I_{665}$  (Top) and their  $E_{FRET}$   
 1732 (Bottom). The time at which the RFC•dGTP complex is added is indicated by a red arrow. For  
 1733 observation, the emission intensity traces and  $E_{FRET}$  values observed in the absence of RFC are  
 1734 each fit to dashed flat lines that are extrapolated. Changes in  $I_{563}$  and  $I_{665}$  observed after each  
 1735 addition are indicated by magenta and cyan arrows, respectively. (C) FRET data. Each  $E_{FRET}$   
 1736 trace is the mean of at least three independent traces with the S.E.M. shown in grey. The times at  
 1737 which RFC•dGTP is added is indicated by red arrows. The  $E_{FRET}$  trace observed prior to the  
 1738 addition of the RFC•dGTP complex is fit to a dashed flat line that is extrapolated to the axis  
 1739 limits to depict the average  $E_{FRET}$  value for no interaction between Cy5-PCNA and the  
 1740 5' ddPCy3/T•RPA complex.

1741  
 1742  
 1743  
 1744  
 1745  
 1746  
 1747  
 1748  
 1749  
 1750  
 1751  
 1752  
 1753  
 1754  
 1755  
 1756  
 1757  
 1758  
 1759  
 1760  
 1761  
 1762  
 1763

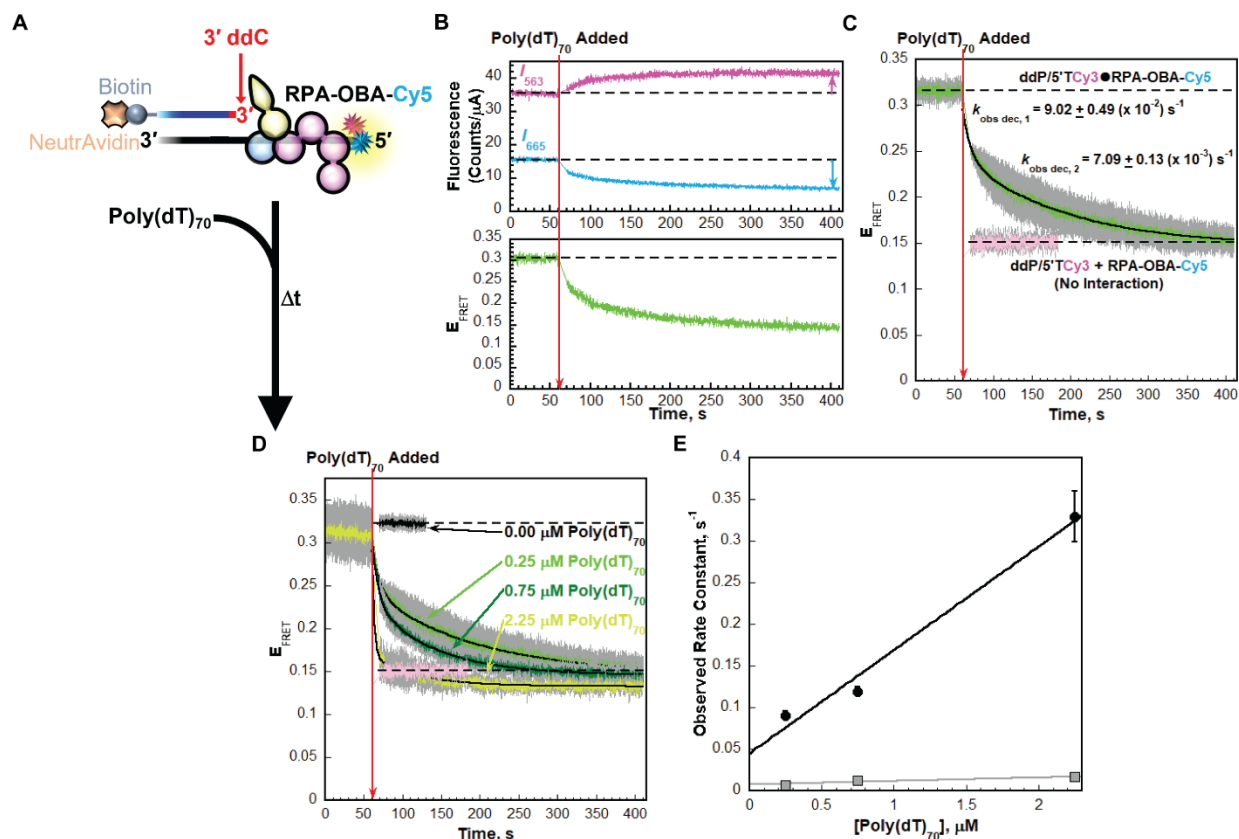

1764 **Figure S14.** Facilitated exchange of RPA between ssDNA sequences. (A) Schematic  
 1765 representation of the FRET experiment performed with ddP/5'TCy3 DNA, RPA-OBA-Cy5,  
 1766 ATP, and poly(dT)<sub>70</sub>. (B) Sample time trajectories of  $I_{563}$  and  $I_{665}$  (Top) and their  $E_{\text{FRET}}$  (Bottom)  
 1767 observed with 0.235 μM poly(dT)<sub>70</sub>. The time at which poly(dT)<sub>70</sub> is added is indicated by a red  
 1768 arrow. For observation, the emission intensity traces and  $E_{\text{FRET}}$  values observed in the absence  
 1769 poly(dT)<sub>70</sub> are each fit to dashed flat lines that are extrapolated. Changes in  $I_{563}$  and  $I_{665}$  observed  
 1770 after each addition are indicated by magenta and cyan arrows, respectively. (C) FRET data  
 1771 observed in the presence of 0.250 μM poly(dT)<sub>70</sub>. Each  $E_{\text{FRET}}$  trace is the mean of three  
 1772 independent traces with the S.E.M. shown in grey. The times at which poly(dT)<sub>70</sub> is added is  
 1773 indicated by a red arrow. The  $E_{\text{FRET}}$  trace observed prior to the addition of poly(dT)<sub>70</sub> is fit to a  
 1774 dashed flat line that is extrapolated to the axis limits. The  $E_{\text{FRET}}$  trace observed after the addition  
 1775 of poly(dT)<sub>70</sub> is fit to a double exponential decline and the observed rate constants ( $k_{\text{obs dec,1}}$  and  
 1776  $k_{\text{obs dec,2}}$ ) are reported in the graph. The predicted  $E_{\text{FRET}}$  trace (pink) for no interaction between  
 1777 RPA-OBA-Cy5 and the ddP/5'TCy3 DNA is fit to a flat line. (D) FRET data observed in the  
 1778 presence of increasing concentrations of poly(dT)<sub>70</sub>. Each  $E_{\text{FRET}}$  trace is the mean of three  
 1779 independent traces with the S.E.M. shown in grey. The times at which poly(dT)<sub>70</sub> is added is  
 1780 indicated by a red arrow. The  $E_{\text{FRET}}$  trace observed after the addition of buffer is fit to a flat line.  
 1781 The  $E_{\text{FRET}}$  traces observed after the addition of a non-zero concentration of poly(dT)<sub>70</sub> are fit to  
 1782 double exponential declines and the observed rate constants ( $k_{\text{obs dec,1}}$  and  $k_{\text{obs dec,2}}$ ) are plotted in  
 1783 panel E as a function of poly(dT)<sub>70</sub> concentration.

1784  
 1785  
 1786  
 1787

| RPA                                                    | Wild-type        |        |                                    |        |                                    |        |                                    |        | RPA-OBA-Cy5                        | Cy5-OBD-RPA |                                    |        |
|--------------------------------------------------------|------------------|--------|------------------------------------|--------|------------------------------------|--------|------------------------------------|--------|------------------------------------|-------------|------------------------------------|--------|
| Cy3 P/T DNA                                            | 5'ddPCy3/T       |        |                                    |        | 5'PCy3/T                           |        | 3'PCy3/T                           |        | 5'ddPCy3/T                         |             | 5'PCy3/T                           |        |
| Buffer                                                 | Mg <sup>2+</sup> |        | Mg <sup>2+</sup> /Ca <sup>2+</sup> |        | Mg <sup>2+</sup> /Ca <sup>2+</sup> |        | Mg <sup>2+</sup> /Ca <sup>2+</sup> |        | Mg <sup>2+</sup> /Ca <sup>2+</sup> |             | Mg <sup>2+</sup> /Ca <sup>2+</sup> |        |
| Variable                                               | Value            | StdErr | Value                              | StdErr | Value                              | StdErr | Value                              | StdErr | Value                              | StdErr      | Value                              | StdErr |
| $k_{obs inc, 1r}$ ( $\times 10^{-2}$ ) s <sup>-1</sup> | 12.2             | 0.4    | 5.29                               | 0.14   | 4.34                               | 0.18   | 4.42                               | 0.10   | Not Observed                       |             | 5.06                               | 0.18   |
| $k_{obs inc, 2r}$ ( $\times 10^{-2}$ ) s <sup>-1</sup> | 1.28             | 0.05   | 1.72                               | 0.02   | 1.79                               | 0.04   | 1.59                               | 0.09   | 2.98                               | 0.05        | 1.83                               | 0.02   |
| $A_T$                                                  | 0.351            | 0.019  | 0.368                              | 0.014  | 0.353                              | 0.002  | 0.146                              | 0.001  | 0.370                              | 0.012       | 0.308                              | 0.013  |

1788 **Table S1.** Kinetic variables of RFC-catalyzed loading of PCNA onto a P/T junction.  
 1789  
 1790  
 1791  
 1792  
 1793  
 1794  
 1795  
 1796  
 1797  
 1798  
 1799  
 1800  
 1801  
 1802  
 1803  
 1804  
 1805  
 1806  
 1807  
 1808  
 1809  
 1810  
 1811  
 1812  
 1813  
 1814  
 1815  
 1816  
 1817  
 1818  
 1819  
 1820  
 1821  
 1822  
 1823  
 1824  
 1825  
 1826  
 1827  
 1828

1829 **References**

- 1830 1 Li, M., Sengupta, B., Benkovic, S. J., Lee, T. H. & Hedglin, M. PCNA Monoubiquitination Is Regulated  
1831 by Diffusion of Rad6/Rad18 Complexes along RPA Filaments. *Biochemistry* **59**, 4694-4702,  
1832 doi:10.1021/acs.biochem.0c00849 (2020).
- 1833 2 Hedglin, M. & Benkovic, S. J. Replication Protein A Prohibits Diffusion of the PCNA Sliding Clamp  
1834 along Single-Stranded DNA. *Biochemistry* **56**, 1824-1835, doi:10.1021/acs.biochem.6b01213 (2017).
- 1835 3 Hedglin, M., Aitha, M. & Benkovic, S. J. Monitoring the Retention of Human Proliferating Cell Nuclear  
1836 Antigen at Primer/Template Junctions by Proteins That Bind Single-Stranded DNA. *Biochemistry* **56**,  
1837 3415-3421, doi:10.1021/acs.biochem.7b00386 (2017).
- 1838 4 Kim, C., Paulus, B. F. & Wold, M. S. Interactions of human replication protein A with  
1839 oligonucleotides. *Biochemistry* **33**, 14197-14206 (1994).
- 1840 5 Kim, C., Snyder, R. O. & Wold, M. S. Binding properties of replication protein A from human and  
1841 yeast cells. *Mol Cell Biol* **12**, 3050-3059 (1992).
- 1842 6 Kim, C. & Wold, M. S. Recombinant human replication protein A binds to polynucleotides with low  
1843 cooperativity. *Biochemistry* **34**, 2058-2064 (1995).
- 1844 7 Kolpashchikov, D. M. *et al.* Polarity of human replication protein A binding to DNA. *Nucleic Acids Res*  
1845 **29**, 373-379, doi:10.1093/nar/29.2.373 (2001).
- 1846 8 Pestryakov, P. E., Khlimankov, D. Y., Bochkareva, E., Bochkarev, A. & Lavrik, O. I. Human replication  
1847 protein A (RPA) binds a primer-template junction in the absence of its major ssDNA-binding  
1848 domains. *Nucleic Acids Res* **32**, 1894-1903, doi:10.1093/nar/gkh346 (2004).
- 1849 9 Pestryakov, P. E. *et al.* Human replication protein A. The C-terminal RPA70 and the central RPA32  
1850 domains are involved in the interactions with the 3'-end of a primer-template DNA. *J Biol Chem* **278**,  
1851 17515-17524, doi:10.1074/jbc.M301265200 (2003).
- 1852 10 Kolpashchikov, D. M. *et al.* Interaction of the p70 subunit of RPA with a DNA template directs p32 to  
1853 the 3'-end of nascent DNA. *FEBS Lett* **450**, 131-134, doi:10.1016/s0014-5793(99)00484-6 (1999).
- 1854 11 Kolinjivadi, A. M. *et al.* Smarcal1-Mediated Fork Reversal Triggers Mre11-Dependent Degradation of  
1855 Nascent DNA in the Absence of Brca2 and Stable Rad51 Nucleofilaments. *Mol Cell* **67**, 867-881 e867,  
1856 doi:10.1016/j.molcel.2017.07.001 (2017).
- 1857 12 Yates, L. A. *et al.* A structural and dynamic model for the assembly of Replication Protein A on single-  
1858 stranded DNA. *Nat Commun* **9**, 5447, doi:10.1038/s41467-018-07883-7 (2018).
- 1859 13 Pokhrel, N. *et al.* Dynamics and selective remodeling of the DNA-binding domains of RPA. *Nat Struct*  
1860 *Mol Biol* **26**, 129-136, doi:10.1038/s41594-018-0181-y (2019).
- 1861 14 Pokhrel, N. *et al.* Monitoring Replication Protein A (RPA) dynamics in homologous recombination  
1862 through site-specific incorporation of non-canonical amino acids. *Nucleic Acids Res* **45**, 9413-9426,  
1863 doi:10.1093/nar/gkx598 (2017).
- 1864 15 Kochaniak, A. B. *et al.* Proliferating cell nuclear antigen uses two distinct modes to move along DNA.  
1865 *J Biol Chem* **284**, 17700-17710, doi:10.1074/jbc.M109.008706 (2009).
- 1866 16 Kubota, T., Katou, Y., Nakato, R., Shirahige, K. & Donaldson, A. D. Replication-Coupled PCNA  
1867 Unloading by the Elg1 Complex Occurs Genome-wide and Requires Okazaki Fragment Ligation. *Cell*  
1868 *Rep* **12**, 774-787, doi:10.1016/j.celrep.2015.06.066 (2015).
- 1869 17 Perumal, S. K., Xu, X., Yan, C., Ivanov, I. & Benkovic, S. J. Recognition of a Key Anchor Residue by a  
1870 Conserved Hydrophobic Pocket Ensures Subunit Interface Integrity in DNA Clamps. *J Mol Biol* **431**,  
1871 2493-2510, doi:10.1016/j.jmb.2019.04.035 (2019).
- 1872 18 Hedglin, M., Perumal, S. K., Hu, Z. & Benkovic, S. Stepwise assembly of the human replicative  
1873 polymerase holoenzyme. *Elife* **2**, e00278, 00271 - 00220, doi:10.7554/eLife.00278 (2013).
- 1874 19 Lee, S. H., Kwong, A. D., Pan, Z. Q. & Hurwitz, J. Studies on the activator 1 protein complex, an  
1875 accessory factor for proliferating cell nuclear antigen-dependent DNA polymerase delta. *J Biol Chem*  
1876 **266**, 594-602 (1991).

- 1877 20 Tims, H. S. & Widom, J. Stopped-flow fluorescence resonance energy transfer for analysis of  
1878 nucleosome dynamics. *Methods* **41**, 296-303, doi:10.1016/j.ymeth.2007.01.001 (2007).
- 1879 21 Ma, C. J., Gibb, B., Kwon, Y., Sung, P. & Greene, E. C. Protein dynamics of human RPA and RAD51 on  
1880 ssDNA during assembly and disassembly of the RAD51 filament. *Nucleic Acids Res* **45**, 749-761,  
1881 doi:10.1093/nar/gkw1125 (2017).
- 1882 22 Ahmad, F. *et al.* Hydrogen-deuterium exchange reveals a dynamic DNA-binding map of replication  
1883 protein A. *Nucleic Acids Res* **49**, 1455-1469, doi:10.1093/nar/gkaa1288 (2021).
- 1884 23 Hedglin, M., Zhang, Y. & O'Brien, P. J. Isolating contributions from intersegmental transfer to DNA  
1885 searching by alkyladenine DNA glycosylase. *J Biol Chem* **288**, 24550-24559,  
1886 doi:10.1074/jbc.M113.477018 (2013).
- 1887 24 Blackwell, L. J. & Borowiec, J. A. Human replication protein A binds single-stranded DNA in two  
1888 distinct complexes. *Mol Cell Biol* **14**, 3993-4001 (1994).
- 1889 25 Li, M., Sengupta, B., Benkovic, S. J., Lee, T. H. & Hedglin, M. PCNA Monoubiquitination Is Regulated  
1890 by Diffusion of Rad6/Rad18 Complexes along RPA Filaments. *Biochemistry*,  
1891 doi:10.1021/acs.biochem.0c00849 (2020).
- 1892 26 Bloomfield, V. A., Crothers, D.M., Tinoco, I. . *Nucleic Acids: Structure, Properties, and Functions*.  
1893 (University Science Books, 2000).
- 1894 27 Chen, J., Le, S., Basu, A., Chazin, W. J. & Yan, J. Mechanochemical regulations of RPA's binding to  
1895 ssDNA. *Sci Rep* **5**, 9296, doi:10.1038/srep09296 (2015).

1896
